# Supplementary material for: Paraxial mesoderm organoids model development of human somites
Source: bioRxiv preprint, doi:10.1101/2021.03.22.436471, version 2 (2021-11-19)
Supplement: Supplemental Table 1, cluster-based marker genes of scRNA-seq dataset [file 436471_file03.csv]

	avg_logFC	p_val_adj	cluster	gene	description
1	2.181115147	0	NMp	NODAL	nodal growth differentiation factor [Source:HGNC Symbol;Acc:HGNC:7865]
2	1.754178401	0	NMp	L1TD1	LINE1 type transposase domain containing 1 [Source:HGNC Symbol;Acc:HGNC:25595]
3	1.706392423	0	NMp	CNTNAP2	contactin associated protein like 2 [Source:HGNC Symbol;Acc:HGNC:13830]
4	1.649259006	0	NMp	POU5F1	POU class 5 homeobox 1 [Source:HGNC Symbol;Acc:HGNC:9221]
5	1.440818919	0	NMp	EPCAM	epithelial cell adhesion molecule [Source:HGNC Symbol;Acc:HGNC:11529]
6	1.428154748	0	NMp	PLA2G16	NA
7	1.418664883	0	NMp	SERPINB9	serpin family B member 9 [Source:HGNC Symbol;Acc:HGNC:8955]
8	1.413713154	0	NMp	RP11-1144P22.1	NA
9	1.407538226	0	NMp	NQO2	N-ribosyldihydronicotinamide:quinone reductase 2 [Source:HGNC Symbol;Acc:HGNC:7856]
10	1.395480343	0	NMp	GAL	galanin and GMAP prepropeptide [Source:HGNC Symbol;Acc:HGNC:4114]
11	1.380687968	0	NMp	CLDN7	claudin 7 [Source:HGNC Symbol;Acc:HGNC:2049]
12	1.338394683	0	NMp	MIXL1	Mix paired-like homeobox [Source:HGNC Symbol;Acc:HGNC:13363]
13	1.326027745	0	NMp	RP11-148B6.1	NA
14	1.2960318	0	NMp	LINC01356	long intergenic non-protein coding RNA 1356 [Source:HGNC Symbol;Acc:HGNC:50587]
15	1.24975877	0	NMp	UGP2	UDP-glucose pyrophosphorylase 2 [Source:HGNC Symbol;Acc:HGNC:12527]
16	1.226843161	0	NMp	APOE	apolipoprotein E [Source:HGNC Symbol;Acc:HGNC:613]
17	1.181051147	0	NMp	SFRP2	secreted frizzled related protein 2 [Source:HGNC Symbol;Acc:HGNC:10777]
18	1.172210883	0	NMp	RP11-568A7.4	NA
19	1.144119948	0	NMp	RARRES2	retinoic acid receptor responder 2 [Source:HGNC Symbol;Acc:HGNC:9868]
20	1.133694941	0	NMp	TDGF1	teratocarcinoma-derived growth factor 1 [Source:HGNC Symbol;Acc:HGNC:11701]
21	1.111005672	0	NMp	CD9	CD9 molecule [Source:HGNC Symbol;Acc:HGNC:1709]
22	1.106826189	0	NMp	CDA	cytidine deaminase [Source:HGNC Symbol;Acc:HGNC:1712]
23	1.097403276	0	NMp	LINC00678	long intergenic non-protein coding RNA 678 [Source:HGNC Symbol;Acc:HGNC:44413]
24	1.087664962	0	NMp	IFITM1	interferon induced transmembrane protein 1 [Source:HGNC Symbol;Acc:HGNC:5412]
25	1.083647174	0	NMp	TUBB2B	tubulin beta 2B class IIb [Source:HGNC Symbol;Acc:HGNC:30829]
26	1.026878062	0	NMp	DSEL	dermatan sulfate epimerase like [Source:HGNC Symbol;Acc:HGNC:18144]
27	1.004693401	0	NMp	FOXH1	forkhead box H1 [Source:HGNC Symbol;Acc:HGNC:3814]
28	0.965743739	0	NMp	LEFTY1	left-right determination factor 1 [Source:HGNC Symbol;Acc:HGNC:6552]
29	0.954983141	0	NMp	SEPHS1	selenophosphate synthetase 1 [Source:HGNC Symbol;Acc:HGNC:19685]
30	0.950567772	0	NMp	SOX2	SRY-box transcription factor 2 [Source:HGNC Symbol;Acc:HGNC:11195]
31	0.946667697	0	NMp	RAB25	RAB25, member RAS oncogene family [Source:HGNC Symbol;Acc:HGNC:18238]
32	0.939368213	0	NMp	PMEPA1	prostate transmembrane protein, androgen induced 1 [Source:HGNC Symbol;Acc:HGNC:14107]
33	0.937886938	0	NMp	PTPRZ1	protein tyrosine phosphatase receptor type Z1 [Source:HGNC Symbol;Acc:HGNC:9685]
34	0.913961445	0	NMp	TPST2	tyrosylprotein sulfotransferase 2 [Source:HGNC Symbol;Acc:HGNC:12021]
35	0.913483461	0	NMp	DKK4	dickkopf WNT signaling pathway inhibitor 4 [Source:HGNC Symbol;Acc:HGNC:2894]
36	0.911014331	0	NMp	SCG3	secretogranin III [Source:HGNC Symbol;Acc:HGNC:13707]
37	0.909595732	0	NMp	TNFRSF12A	TNF receptor superfamily member 12A [Source:HGNC Symbol;Acc:HGNC:18152]
38	0.908208777	0	NMp	PLPP2	phospholipid phosphatase 2 [Source:HGNC Symbol;Acc:HGNC:9230]
39	0.89690644	0	NMp	ALDH3A2	aldehyde dehydrogenase 3 family member A2 [Source:HGNC Symbol;Acc:HGNC:403]
40	0.895984419	0	NMp	EOMES	eomesodermin [Source:HGNC Symbol;Acc:HGNC:3372]
41	0.888496494	0	NMp	CLDN6	claudin 6 [Source:HGNC Symbol;Acc:HGNC:2048]
42	0.88665799	0	NMp	CBR1	carbonyl reductase 1 [Source:HGNC Symbol;Acc:HGNC:1548]
43	0.879591686	0	NMp	FAM159B	NA
44	0.878081043	0	NMp	B3GNT7	UDP-GlcNAc:betaGal beta-1,3-N-acetylglucosaminyltransferase 7 [Source:HGNC Symbol;Acc:HGNC:18811]
45	0.875495071	0	NMp	DNMT3B	DNA methyltransferase 3 beta [Source:HGNC Symbol;Acc:HGNC:2979]
46	0.873305333	0	NMp	CRABP1	cellular retinoic acid binding protein 1 [Source:HGNC Symbol;Acc:HGNC:2338]
47	0.860999942	0	NMp	DMKN	dermokine [Source:HGNC Symbol;Acc:HGNC:25063]
48	0.84949634	0	NMp	NMRK2	nicotinamide riboside kinase 2 [Source:HGNC Symbol;Acc:HGNC:17871]
49	0.835909295	0	NMp	NFE2L3	nuclear factor, erythroid 2 like 3 [Source:HGNC Symbol;Acc:HGNC:7783]
50	0.824274319	0	NMp	GLIPR1L1	GLIPR1 like 1 [Source:HGNC Symbol;Acc:HGNC:28392]
51	0.81040194	0	NMp	DPPA4	developmental pluripotency associated 4 [Source:HGNC Symbol;Acc:HGNC:19200]
52	0.806917905	0	NMp	IER3	immediate early response 3 [Source:HGNC Symbol;Acc:HGNC:5392]
53	0.79780671	0	NMp	TUBB2A	tubulin beta 2A class IIa [Source:HGNC Symbol;Acc:HGNC:12412]
54	0.791346519	0	NMp	PYCARD	PYD and CARD domain containing [Source:HGNC Symbol;Acc:HGNC:16608]
55	0.783997537	0	NMp	NANOG	Nanog homeobox [Source:HGNC Symbol;Acc:HGNC:20857]
56	0.765271517	0	NMp	GSTT2B	glutathione S-transferase theta 2B (gene/pseudogene) [Source:HGNC Symbol;Acc:HGNC:33437]
57	0.751517335	0	NMp	MAL2	mal, T cell differentiation protein 2 (gene/pseudogene) [Source:HGNC Symbol;Acc:HGNC:13634]
58	0.746840084	0	NMp	KIF1A	kinesin family member 1A [Source:HGNC Symbol;Acc:HGNC:888]
59	0.739391415	0	NMp	UCHL1	ubiquitin C-terminal hydrolase L1 [Source:HGNC Symbol;Acc:HGNC:12513]
60	0.737523353	0	NMp	SPINT2	serine peptidase inhibitor, Kunitz type 2 [Source:HGNC Symbol;Acc:HGNC:11247]
61	0.734735736	0	NMp	RP11-267L5.1	NA
62	0.730161111	0	NMp	NIPA2	NIPA magnesium transporter 2 [Source:HGNC Symbol;Acc:HGNC:17044]
63	0.729989262	0	NMp	GSTO1	glutathione S-transferase omega 1 [Source:HGNC Symbol;Acc:HGNC:13312]
64	0.728111006	0	NMp	SLC3A2	solute carrier family 3 member 2 [Source:HGNC Symbol;Acc:HGNC:11026]
65	0.715134676	0	NMp	OLFM2	olfactomedin 2 [Source:HGNC Symbol;Acc:HGNC:17189]
66	0.709052433	0	NMp	MGST1	microsomal glutathione S-transferase 1 [Source:HGNC Symbol;Acc:HGNC:7061]
67	0.702787556	0	NMp	USP44	ubiquitin specific peptidase 44 [Source:HGNC Symbol;Acc:HGNC:20064]
68	0.698835151	0	NMp	LINC00467	long intergenic non-protein coding RNA 467 [Source:HGNC Symbol;Acc:HGNC:28227]
69	0.696557228	0	NMp	VAMP8	vesicle associated membrane protein 8 [Source:HGNC Symbol;Acc:HGNC:12647]
70	0.695368635	0	NMp	ATP5H	NA
71	0.688744549	0	NMp	POLR3G	RNA polymerase III subunit G [Source:HGNC Symbol;Acc:HGNC:30075]
72	0.683560713	0	NMp	DDT	D-dopachrome tautomerase [Source:HGNC Symbol;Acc:HGNC:2732]
73	0.677375116	0	NMp	FOXA2	forkhead box A2 [Source:HGNC Symbol;Acc:HGNC:5022]
74	0.672006934	0	NMp	NKX1-2	NK1 homeobox 2 [Source:HGNC Symbol;Acc:HGNC:31652]
75	0.669973002	0	NMp	ID1	inhibitor of DNA binding 1, HLH protein [Source:HGNC Symbol;Acc:HGNC:5360]
76	0.668185981	0	NMp	CLU	clusterin [Source:HGNC Symbol;Acc:HGNC:2095]
77	0.667816273	0	NMp	FRAT2	FRAT regulator of WNT signaling pathway 2 [Source:HGNC Symbol;Acc:HGNC:16048]
78	0.667582688	0	NMp	TERF1	telomeric repeat binding factor 1 [Source:HGNC Symbol;Acc:HGNC:11728]
79	0.6652842	0	NMp	NEFL	neurofilament light [Source:HGNC Symbol;Acc:HGNC:7739]
80	0.653481665	0	NMp	CDH1	cadherin 1 [Source:HGNC Symbol;Acc:HGNC:1748]
81	0.653046397	0	NMp	AK4	adenylate kinase 4 [Source:HGNC Symbol;Acc:HGNC:363]
82	0.648965356	0	NMp	DCLK1	doublecortin like kinase 1 [Source:HGNC Symbol;Acc:HGNC:2700]
83	0.638988918	0	NMp	IVNS1ABP	influenza virus NS1A binding protein [Source:HGNC Symbol;Acc:HGNC:16951]
84	0.628690587	0	NMp	PINK1	PTEN induced kinase 1 [Source:HGNC Symbol;Acc:HGNC:14581]
85	0.628450722	0	NMp	DPYSL3	dihydropyrimidinase like 3 [Source:HGNC Symbol;Acc:HGNC:3015]
86	0.627592942	0	NMp	ABRACL	ABRA C-terminal like [Source:HGNC Symbol;Acc:HGNC:21230]
87	0.613362084	0	NMp	SERPINE2	serpin family E member 2 [Source:HGNC Symbol;Acc:HGNC:8951]
88	0.609880558	0	NMp	IER2	immediate early response 2 [Source:HGNC Symbol;Acc:HGNC:28871]
89	0.608521099	0	NMp	OCIAD2	OCIA domain containing 2 [Source:HGNC Symbol;Acc:HGNC:28685]
90	0.607155954	0	NMp	CKB	creatine kinase B [Source:HGNC Symbol;Acc:HGNC:1991]
91	0.604466508	0	NMp	BNIP3	BCL2 interacting protein 3 [Source:HGNC Symbol;Acc:HGNC:1084]
92	0.599931384	0	NMp	TRDN	triadin [Source:HGNC Symbol;Acc:HGNC:12261]
93	0.596600509	0	NMp	CTSC	cathepsin C [Source:HGNC Symbol;Acc:HGNC:2528]
94	0.593431497	0	NMp	CASP3	caspase 3 [Source:HGNC Symbol;Acc:HGNC:1504]
95	0.590566744	0	NMp	GSC	goosecoid homeobox [Source:HGNC Symbol;Acc:HGNC:4612]
96	0.587548914	0	NMp	VRTN	vertebrae development associated [Source:HGNC Symbol;Acc:HGNC:20223]
97	0.58235684	0	NMp	AP1M2	adaptor related protein complex 1 subunit mu 2 [Source:HGNC Symbol;Acc:HGNC:558]
98	0.578748988	0	NMp	PHGDH	phosphoglycerate dehydrogenase [Source:HGNC Symbol;Acc:HGNC:8923]
99	0.576404562	0	NMp	FGF4	fibroblast growth factor 4 [Source:HGNC Symbol;Acc:HGNC:3682]
100	0.571287178	0	NMp	ZSCAN10	zinc finger and SCAN domain containing 10 [Source:HGNC Symbol;Acc:HGNC:12997]
101	0.563065628	0	NMp	EIF4EBP1	eukaryotic translation initiation factor 4E binding protein 1 [Source:HGNC Symbol;Acc:HGNC:3288]
102	0.562455433	0	NMp	PEBP1	phosphatidylethanolamine binding protein 1 [Source:HGNC Symbol;Acc:HGNC:8630]
103	0.562385288	0	NMp	LIN28A	lin-28 homolog A [Source:HGNC Symbol;Acc:HGNC:15986]
104	0.561518695	0	NMp	GSTP1	glutathione S-transferase pi 1 [Source:HGNC Symbol;Acc:HGNC:4638]
105	0.558078571	0	NMp	EZR	ezrin [Source:HGNC Symbol;Acc:HGNC:12691]
106	0.557825995	0	NMp	RBPMS	RNA binding protein, mRNA processing factor [Source:HGNC Symbol;Acc:HGNC:19097]
107	0.550223646	0	NMp	CYCS	cytochrome c, somatic [Source:HGNC Symbol;Acc:HGNC:19986]
108	0.548066398	0	NMp	HPDL	4-hydroxyphenylpyruvate dioxygenase like [Source:HGNC Symbol;Acc:HGNC:28242]
109	0.547963778	0	NMp	FAM195A	NA
110	0.546247502	0	NMp	FAM162A	family with sequence similarity 162 member A [Source:HGNC Symbol;Acc:HGNC:17865]
111	0.546122451	0	NMp	LINC01405	long intergenic non-protein coding RNA 1405 [Source:HGNC Symbol;Acc:HGNC:50688]
112	0.543614471	0	NMp	NPM3	nucleophosmin/nucleoplasmin 3 [Source:HGNC Symbol;Acc:HGNC:7931]
113	0.542824849	0	NMp	BEX2	brain expressed X-linked 2 [Source:HGNC Symbol;Acc:HGNC:30933]
114	0.541702471	0	NMp	PPP1R3B	protein phosphatase 1 regulatory subunit 3B [Source:HGNC Symbol;Acc:HGNC:14942]
115	0.536901583	0	NMp	SLC7A5	solute carrier family 7 member 5 [Source:HGNC Symbol;Acc:HGNC:11063]
116	0.534537407	0	NMp	FST	follistatin [Source:HGNC Symbol;Acc:HGNC:3971]
117	0.531012281	0	NMp	FGF19	fibroblast growth factor 19 [Source:HGNC Symbol;Acc:HGNC:3675]
118	0.530885427	0	NMp	ZNF649	zinc finger protein 649 [Source:HGNC Symbol;Acc:HGNC:25741]
119	0.530073183	0	NMp	GCHFR	GTP cyclohydrolase I feedback regulator [Source:HGNC Symbol;Acc:HGNC:4194]
120	0.521691462	0	NMp	GAP43	growth associated protein 43 [Source:HGNC Symbol;Acc:HGNC:4140]
121	0.517021619	0	NMp	IRX2	iroquois homeobox 2 [Source:HGNC Symbol;Acc:HGNC:14359]
122	0.516519996	0	NMp	PMAIP1	phorbol-12-myristate-13-acetate-induced protein 1 [Source:HGNC Symbol;Acc:HGNC:9108]
123	0.51609414	0	NMp	PSIP1	PC4 and SFRS1 interacting protein 1 [Source:HGNC Symbol;Acc:HGNC:9527]
124	0.501618898	0	NMp	ESRP1	epithelial splicing regulatory protein 1 [Source:HGNC Symbol;Acc:HGNC:25966]
125	0.49932907	0	NMp	YBX3	Y-box binding protein 3 [Source:HGNC Symbol;Acc:HGNC:2428]
126	0.498234147	0	NMp	P3H2	prolyl 3-hydroxylase 2 [Source:HGNC Symbol;Acc:HGNC:19317]
127	0.495431355	0	NMp	LINC00545	long intergenic non-protein coding RNA 545 [Source:HGNC Symbol;Acc:HGNC:43680]
128	0.494917184	0	NMp	SAP18	Sin3A associated protein 18 [Source:HGNC Symbol;Acc:HGNC:10530]
129	0.493441809	0	NMp	LECT1	NA
130	0.492806647	0	NMp	BLVRB	biliverdin reductase B [Source:HGNC Symbol;Acc:HGNC:1063]
131	0.490593653	0	NMp	SLC25A4	solute carrier family 25 member 4 [Source:HGNC Symbol;Acc:HGNC:10990]
132	0.489932543	0	NMp	PRDX6	peroxiredoxin 6 [Source:HGNC Symbol;Acc:HGNC:16753]
133	0.489471742	0	NMp	PDLIM1	PDZ and LIM domain 1 [Source:HGNC Symbol;Acc:HGNC:2067]
134	0.484681836	0	NMp	DUSP23	dual specificity phosphatase 23 [Source:HGNC Symbol;Acc:HGNC:21480]
135	0.483518306	0	NMp	LSR	lipolysis stimulated lipoprotein receptor [Source:HGNC Symbol;Acc:HGNC:29572]
136	0.482869663	0	NMp	LINC01315	long intergenic non-protein coding RNA 1315 [Source:HGNC Symbol;Acc:HGNC:50513]
137	0.480116579	0	NMp	PCDH10	protocadherin 10 [Source:HGNC Symbol;Acc:HGNC:13404]
138	0.472669682	0	NMp	RHOB	ras homolog family member B [Source:HGNC Symbol;Acc:HGNC:668]
139	0.470110465	0	NMp	GRB14	growth factor receptor bound protein 14 [Source:HGNC Symbol;Acc:HGNC:4565]
140	0.469929067	0	NMp	ISOC2	isochorismatase domain containing 2 [Source:HGNC Symbol;Acc:HGNC:26278]
141	0.468741337	0	NMp	KDR	kinase insert domain receptor [Source:HGNC Symbol;Acc:HGNC:6307]
142	0.462535955	0	NMp	UBE2D2	ubiquitin conjugating enzyme E2 D2 [Source:HGNC Symbol;Acc:HGNC:12475]
143	0.461589387	0	NMp	AP000688.29	NA
144	0.461307397	0	NMp	TMEM147	transmembrane protein 147 [Source:HGNC Symbol;Acc:HGNC:30414]
145	0.459682472	0	NMp	CDCA7L	cell division cycle associated 7 like [Source:HGNC Symbol;Acc:HGNC:30777]
146	0.456500554	0	NMp	NEFM	neurofilament medium [Source:HGNC Symbol;Acc:HGNC:7734]
147	0.455984119	0	NMp	ID2	inhibitor of DNA binding 2 [Source:HGNC Symbol;Acc:HGNC:5361]
148	0.454816353	0	NMp	GDF3	growth differentiation factor 3 [Source:HGNC Symbol;Acc:HGNC:4218]
149	0.454572572	0	NMp	SPINT1	serine peptidase inhibitor, Kunitz type 1 [Source:HGNC Symbol;Acc:HGNC:11246]
150	0.451904013	0	NMp	TMSB4X	thymosin beta 4 X-linked [Source:HGNC Symbol;Acc:HGNC:11881]
151	0.445136574	0	NMp	RND2	Rho family GTPase 2 [Source:HGNC Symbol;Acc:HGNC:18315]
152	0.435534975	0	NMp	CTD-2501M5.1	NA
153	0.429838027	0	NMp	ERP29	endoplasmic reticulum protein 29 [Source:HGNC Symbol;Acc:HGNC:13799]
154	0.428459809	0	NMp	MRPS34	mitochondrial ribosomal protein S34 [Source:HGNC Symbol;Acc:HGNC:16618]
155	0.424515099	0	NMp	MARVELD3	MARVEL domain containing 3 [Source:HGNC Symbol;Acc:HGNC:30525]
156	0.418159181	0	NMp	GRM4	glutamate metabotropic receptor 4 [Source:HGNC Symbol;Acc:HGNC:4596]
157	0.417061136	0	NMp	GYLTL1B	NA
158	0.415679553	0	NMp	TMEM238	transmembrane protein 238 [Source:HGNC Symbol;Acc:HGNC:40042]
159	0.415409181	0	NMp	SCGB3A2	secretoglobin family 3A member 2 [Source:HGNC Symbol;Acc:HGNC:18391]
160	0.414170306	0	NMp	MIF	macrophage migration inhibitory factor [Source:HGNC Symbol;Acc:HGNC:7097]
161	0.413211047	0	NMp	HMGA1	high mobility group AT-hook 1 [Source:HGNC Symbol;Acc:HGNC:5010]
162	0.409881844	0	NMp	TIMM13	translocase of inner mitochondrial membrane 13 [Source:HGNC Symbol;Acc:HGNC:11816]
163	0.409443754	0	NMp	C3orf58	NA
164	0.402916015	0	NMp	CCDC169	coiled-coil domain containing 169 [Source:HGNC Symbol;Acc:HGNC:34361]
165	0.401983793	0	NMp	KRTCAP3	keratinocyte associated protein 3 [Source:HGNC Symbol;Acc:HGNC:28943]
166	0.401779174	0	NMp	ARHGEF35	Rho guanine nucleotide exchange factor 35 [Source:HGNC Symbol;Acc:HGNC:33846]
167	0.40131688	0	NMp	PRKX	protein kinase X-linked [Source:HGNC Symbol;Acc:HGNC:9441]
168	0.399717319	0	NMp	BACE2	beta-secretase 2 [Source:HGNC Symbol;Acc:HGNC:934]
169	0.399204771	0	NMp	TALDO1	transaldolase 1 [Source:HGNC Symbol;Acc:HGNC:11559]
170	0.399115268	0	NMp	ATP5I	NA
171	0.398324014	0	NMp	ABHD17B	abhydrolase domain containing 17B [Source:HGNC Symbol;Acc:HGNC:24278]
172	0.396382867	0	NMp	RBM47	RNA binding motif protein 47 [Source:HGNC Symbol;Acc:HGNC:30358]
173	0.393883811	0	NMp	TOMM7	translocase of outer mitochondrial membrane 7 [Source:HGNC Symbol;Acc:HGNC:21648]
174	0.387933684	0	NMp	C1QBP	complement C1q binding protein [Source:HGNC Symbol;Acc:HGNC:1243]
175	0.385459549	0	NMp	ATP5G1	NA
176	0.385000577	0	NMp	GABRB2	gamma-aminobutyric acid type A receptor beta2 subunit [Source:HGNC Symbol;Acc:HGNC:4082]
177	0.380335902	0	NMp	PDPN	podoplanin [Source:HGNC Symbol;Acc:HGNC:29602]
178	0.379006128	0	NMp	COX5A	cytochrome c oxidase subunit 5A [Source:HGNC Symbol;Acc:HGNC:2267]
179	0.377729113	0	NMp	COX7C	cytochrome c oxidase subunit 7C [Source:HGNC Symbol;Acc:HGNC:2292]
180	0.375623661	0	NMp	C1GALT1	core 1 synthase, glycoprotein-N-acetylgalactosamine 3-beta-galactosyltransferase 1 [Source:HGNC Symbol;Acc:HGNC:24337]
181	0.372041172	0	NMp	RP11-562F9.2	NA
182	0.3715161	0	NMp	HLA-DQB1	major histocompatibility complex, class II, DQ beta 1 [Source:HGNC Symbol;Acc:HGNC:4944]
183	0.370239842	0	NMp	CHST9	carbohydrate sulfotransferase 9 [Source:HGNC Symbol;Acc:HGNC:19898]
184	0.369140777	0	NMp	ETV1	ETS variant 1 [Source:HGNC Symbol;Acc:HGNC:3490]
185	0.364754138	0	NMp	SLIRP	SRA stem-loop interacting RNA binding protein [Source:HGNC Symbol;Acc:HGNC:20495]
186	0.36465971	0	NMp	NDUFB4	NADH:ubiquinone oxidoreductase subunit B4 [Source:HGNC Symbol;Acc:HGNC:7699]
187	0.361503077	0	NMp	RAB38	RAB38, member RAS oncogene family [Source:HGNC Symbol;Acc:HGNC:9776]
188	0.355591236	0	NMp	HSPE1	heat shock protein family E (Hsp10) member 1 [Source:HGNC Symbol;Acc:HGNC:5269]
189	0.354215884	0	NMp	DBNDD1	dysbindin domain containing 1 [Source:HGNC Symbol;Acc:HGNC:28455]
190	0.353120699	0	NMp	RP11-132A1.3	NA
191	0.347258849	0	NMp	CLDN3	claudin 3 [Source:HGNC Symbol;Acc:HGNC:2045]
192	0.347063132	0	NMp	LMO7	LIM domain 7 [Source:HGNC Symbol;Acc:HGNC:6646]
193	0.341018632	0	NMp	APELA	apelin receptor early endogenous ligand [Source:HGNC Symbol;Acc:HGNC:48925]
194	0.338068267	0	NMp	MAP7	microtubule associated protein 7 [Source:HGNC Symbol;Acc:HGNC:6869]
195	0.334872702	0	NMp	EPHA1	EPH receptor A1 [Source:HGNC Symbol;Acc:HGNC:3385]
196	0.333770197	0	NMp	HERC5	HECT and RLD domain containing E3 ubiquitin protein ligase 5 [Source:HGNC Symbol;Acc:HGNC:24368]
197	0.332405628	0	NMp	IRF2BPL	interferon regulatory factor 2 binding protein like [Source:HGNC Symbol;Acc:HGNC:14282]
198	0.332191014	0	NMp	CTD-2306M5.1	NA
199	0.331751437	0	NMp	CER1	cerberus 1, DAN family BMP antagonist [Source:HGNC Symbol;Acc:HGNC:1862]
200	0.331134046	0	NMp	AHSP	alpha hemoglobin stabilizing protein [Source:HGNC Symbol;Acc:HGNC:18075]
201	0.329042755	0	NMp	ADD2	adducin 2 [Source:HGNC Symbol;Acc:HGNC:244]
202	0.327648666	0	NMp	CXCL12	C-X-C motif chemokine ligand 12 [Source:HGNC Symbol;Acc:HGNC:10672]
203	0.326817266	0	NMp	RPL8	ribosomal protein L8 [Source:HGNC Symbol;Acc:HGNC:10368]
204	0.323814389	0	NMp	PFN1	profilin 1 [Source:HGNC Symbol;Acc:HGNC:8881]
205	0.323394591	0	NMp	PPP1R1A	protein phosphatase 1 regulatory inhibitor subunit 1A [Source:HGNC Symbol;Acc:HGNC:9286]
206	0.320923216	0	NMp	FTL	ferritin light chain [Source:HGNC Symbol;Acc:HGNC:3999]
207	0.319465819	0	NMp	SCNN1A	sodium channel epithelial 1 alpha subunit [Source:HGNC Symbol;Acc:HGNC:10599]
208	0.318338148	0	NMp	TPD52	tumor protein D52 [Source:HGNC Symbol;Acc:HGNC:12005]
209	0.315883781	0	NMp	ADCY2	adenylate cyclase 2 [Source:HGNC Symbol;Acc:HGNC:233]
210	0.312329915	0	NMp	LRAT	lecithin retinol acyltransferase [Source:HGNC Symbol;Acc:HGNC:6685]
211	0.311716732	0	NMp	PITX2	paired like homeodomain 2 [Source:HGNC Symbol;Acc:HGNC:9005]
212	0.309283677	0	NMp	FBXO2	F-box protein 2 [Source:HGNC Symbol;Acc:HGNC:13581]
213	0.308378645	0	NMp	MTL5	NA
214	0.304366187	0	NMp	NIPA1	NIPA magnesium transporter 1 [Source:HGNC Symbol;Acc:HGNC:17043]
215	0.304014141	0	NMp	P2RY1	purinergic receptor P2Y1 [Source:HGNC Symbol;Acc:HGNC:8539]
216	0.303505115	0	NMp	NGFRAP1	NA
217	0.300910638	0	NMp	CYP2S1	cytochrome P450 family 2 subfamily S member 1 [Source:HGNC Symbol;Acc:HGNC:15654]
218	0.299735141	0	NMp	CRIP3	cysteine rich protein 3 [Source:HGNC Symbol;Acc:HGNC:17751]
219	0.297865559	0	NMp	MYCL	MYCL proto-oncogene, bHLH transcription factor [Source:HGNC Symbol;Acc:HGNC:7555]
220	0.2946803	0	NMp	PIM2	Pim-2 proto-oncogene, serine/threonine kinase [Source:HGNC Symbol;Acc:HGNC:8987]
221	0.289743055	0	NMp	OCLN	occludin [Source:HGNC Symbol;Acc:HGNC:8104]
222	0.289711895	0	NMp	PLA2G2A	phospholipase A2 group IIA [Source:HGNC Symbol;Acc:HGNC:9031]
223	0.289365687	0	NMp	SMPDL3B	sphingomyelin phosphodiesterase acid like 3B [Source:HGNC Symbol;Acc:HGNC:21416]
224	0.286571427	0	NMp	LDHB	lactate dehydrogenase B [Source:HGNC Symbol;Acc:HGNC:6541]
225	0.282403165	0	NMp	VSNL1	visinin like 1 [Source:HGNC Symbol;Acc:HGNC:12722]
226	0.279424985	0	NMp	MIAT	myocardial infarction associated transcript [Source:HGNC Symbol;Acc:HGNC:33425]
227	0.275453522	0	NMp	EPHX3	epoxide hydrolase 3 [Source:HGNC Symbol;Acc:HGNC:23760]
228	0.273861265	0	NMp	PPP1R14B	protein phosphatase 1 regulatory inhibitor subunit 14B [Source:HGNC Symbol;Acc:HGNC:9057]
229	0.272949992	0	NMp	RUNX1T1	RUNX1 partner transcriptional co-repressor 1 [Source:HGNC Symbol;Acc:HGNC:1535]
230	0.272504088	0	NMp	PIM1	Pim-1 proto-oncogene, serine/threonine kinase [Source:HGNC Symbol;Acc:HGNC:8986]
231	0.272269516	0	NMp	MARVELD2	MARVEL domain containing 2 [Source:HGNC Symbol;Acc:HGNC:26401]
232	0.269971463	0	NMp	EFEMP1	EGF containing fibulin extracellular matrix protein 1 [Source:HGNC Symbol;Acc:HGNC:3218]
233	0.267323048	0	NMp	CADPS2	calcium dependent secretion activator 2 [Source:HGNC Symbol;Acc:HGNC:16018]
234	0.265467892	0	NMp	HLA-DRB1	major histocompatibility complex, class II, DR beta 1 [Source:HGNC Symbol;Acc:HGNC:4948]
235	0.26525087	0	NMp	PSMB8	proteasome subunit beta 8 [Source:HGNC Symbol;Acc:HGNC:9545]
236	0.264887435	0	NMp	CPT1A	carnitine palmitoyltransferase 1A [Source:HGNC Symbol;Acc:HGNC:2328]
237	0.264819312	0	NMp	CRYBB1	crystallin beta B1 [Source:HGNC Symbol;Acc:HGNC:2397]
238	0.264185869	0	NMp	SHISA9	shisa family member 9 [Source:HGNC Symbol;Acc:HGNC:37231]
239	0.261637247	0	NMp	KLKB1	kallikrein B1 [Source:HGNC Symbol;Acc:HGNC:6371]
240	0.255276649	0	NMp	UQCRH	ubiquinol-cytochrome c reductase hinge protein [Source:HGNC Symbol;Acc:HGNC:12590]
241	0.253577681	0	NMp	ROR1	receptor tyrosine kinase like orphan receptor 1 [Source:HGNC Symbol;Acc:HGNC:10256]
242	0.252655194	0	NMp	FOXD3-AS1	FOXD3 antisense RNA 1 [Source:HGNC Symbol;Acc:HGNC:40241]
243	0.251924892	0	NMp	MUC3A	mucin 3A, cell surface associated [Source:HGNC Symbol;Acc:HGNC:7513]
244	0.251163993	0	NMp	LEFTY2	left-right determination factor 2 [Source:HGNC Symbol;Acc:HGNC:3122]
245	0.250412982	0	NMp	ERBB3	erb-b2 receptor tyrosine kinase 3 [Source:HGNC Symbol;Acc:HGNC:3431]
246	0.329411377	2.11E-303	NMp	SLC25A5	solute carrier family 25 member 5 [Source:HGNC Symbol;Acc:HGNC:10991]
247	0.359015827	1.38E-302	NMp	GCA	grancalcin [Source:HGNC Symbol;Acc:HGNC:15990]
248	0.347826534	2.53E-302	NMp	ENY2	ENY2 transcription and export complex 2 subunit [Source:HGNC Symbol;Acc:HGNC:24449]
249	0.443401791	1.87E-301	NMp	SNRPN	small nuclear ribonucleoprotein polypeptide N [Source:HGNC Symbol;Acc:HGNC:11164]
250	0.268262064	9.41E-301	NMp	RPP25	ribonuclease P and MRP subunit p25 [Source:HGNC Symbol;Acc:HGNC:30361]
251	0.281533286	4.30E-300	NMp	GRID2	glutamate ionotropic receptor delta type subunit 2 [Source:HGNC Symbol;Acc:HGNC:4576]
252	0.404271345	1.43E-298	NMp	GGCT	gamma-glutamylcyclotransferase [Source:HGNC Symbol;Acc:HGNC:21705]
253	0.416296214	3.23E-297	NMp	WFDC2	WAP four-disulfide core domain 2 [Source:HGNC Symbol;Acc:HGNC:15939]
254	0.306623649	4.91E-297	NMp	CLN8	CLN8 transmembrane ER and ERGIC protein [Source:HGNC Symbol;Acc:HGNC:2079]
255	0.342396596	5.25E-297	NMp	GPX1	glutathione peroxidase 1 [Source:HGNC Symbol;Acc:HGNC:4553]
256	0.403806782	5.29E-297	NMp	HSPA8	heat shock protein family A (Hsp70) member 8 [Source:HGNC Symbol;Acc:HGNC:5241]
257	0.276083402	1.10E-296	NMp	RP11-69I8.2	NA
258	0.320162642	1.39E-296	NMp	ATP6V1G1	ATPase H+ transporting V1 subunit G1 [Source:HGNC Symbol;Acc:HGNC:864]
259	0.408440584	1.72E-294	NMp	TOMM40	translocase of outer mitochondrial membrane 40 [Source:HGNC Symbol;Acc:HGNC:18001]
260	0.257883786	1.24E-293	NMp	RP11-532F12.5	NA
261	0.333607473	5.45E-292	NMp	CERS4	ceramide synthase 4 [Source:HGNC Symbol;Acc:HGNC:23747]
262	0.25428231	3.26E-289	NMp	ATXN7L1	ataxin 7 like 1 [Source:HGNC Symbol;Acc:HGNC:22210]
263	0.387671324	1.29E-288	NMp	SLC2A3	solute carrier family 2 member 3 [Source:HGNC Symbol;Acc:HGNC:11007]
264	0.531258918	5.13E-288	NMp	T	NA
265	0.352161735	1.02E-287	NMp	CITED4	Cbp/p300 interacting transactivator with Glu/Asp rich carboxy-terminal domain 4 [Source:HGNC Symbol;Acc:HGNC:18696]
266	0.423074148	1.38E-286	NMp	SMS	spermine synthase [Source:HGNC Symbol;Acc:HGNC:11123]
267	0.346794242	1.05E-283	NMp	GPR143	G protein-coupled receptor 143 [Source:HGNC Symbol;Acc:HGNC:20145]
268	0.2779041	1.73E-283	NMp	HLA-DRA	major histocompatibility complex, class II, DR alpha [Source:HGNC Symbol;Acc:HGNC:4947]
269	0.464861513	6.82E-283	NMp	JUND	JunD proto-oncogene, AP-1 transcription factor subunit [Source:HGNC Symbol;Acc:HGNC:6206]
270	0.567726234	3.90E-282	NMp	LINC00458	long intergenic non-protein coding RNA 458 [Source:HGNC Symbol;Acc:HGNC:42807]
271	0.394404058	6.18E-281	NMp	FAM60A	NA
272	0.271303818	3.40E-280	NMp	PDGFA	platelet derived growth factor subunit A [Source:HGNC Symbol;Acc:HGNC:8799]
273	0.254719059	8.72E-278	NMp	PPM1J	protein phosphatase, Mg2+/Mn2+ dependent 1J [Source:HGNC Symbol;Acc:HGNC:20785]
274	0.434557205	1.86E-277	NMp	IMPA2	inositol monophosphatase 2 [Source:HGNC Symbol;Acc:HGNC:6051]
275	0.448796634	3.08E-277	NMp	EMC9	ER membrane protein complex subunit 9 [Source:HGNC Symbol;Acc:HGNC:20273]
276	0.34424401	3.82E-276	NMp	LDB2	LIM domain binding 2 [Source:HGNC Symbol;Acc:HGNC:6533]
277	0.2982977	1.72E-275	NMp	APRT	adenine phosphoribosyltransferase [Source:HGNC Symbol;Acc:HGNC:626]
278	0.319111304	5.28E-275	NMp	RP11-20D14.6	NA
279	0.430816722	1.93E-274	NMp	RRAS2	RAS related 2 [Source:HGNC Symbol;Acc:HGNC:17271]
280	0.449532623	3.54E-273	NMp	PAWR	pro-apoptotic WT1 regulator [Source:HGNC Symbol;Acc:HGNC:8614]
281	0.25548462	1.19E-272	NMp	SET	SET nuclear proto-oncogene [Source:HGNC Symbol;Acc:HGNC:10760]
282	0.311347198	1.50E-268	NMp	ANXA3	annexin A3 [Source:HGNC Symbol;Acc:HGNC:541]
283	0.255241471	3.53E-268	NMp	GAPDH	glyceraldehyde-3-phosphate dehydrogenase [Source:HGNC Symbol;Acc:HGNC:4141]
284	0.420053458	1.11E-267	NMp	CAMKK2	calcium/calmodulin dependent protein kinase kinase 2 [Source:HGNC Symbol;Acc:HGNC:1470]
285	0.286238795	3.99E-266	NMp	PRELID1	PRELI domain containing 1 [Source:HGNC Symbol;Acc:HGNC:30255]
286	0.429126757	3.97E-265	NMp	DNAJB6	DnaJ heat shock protein family (Hsp40) member B6 [Source:HGNC Symbol;Acc:HGNC:14888]
287	0.332189797	2.08E-264	NMp	APOBEC3C	apolipoprotein B mRNA editing enzyme catalytic subunit 3C [Source:HGNC Symbol;Acc:HGNC:17353]
288	0.287365761	3.14E-262	NMp	NDUFS6	NADH:ubiquinone oxidoreductase subunit S6 [Source:HGNC Symbol;Acc:HGNC:7713]
289	0.480748261	3.67E-261	NMp	SEMA6A	semaphorin 6A [Source:HGNC Symbol;Acc:HGNC:10738]
290	0.415245341	2.02E-260	NMp	MDH1	malate dehydrogenase 1 [Source:HGNC Symbol;Acc:HGNC:6970]
291	0.287712421	4.51E-257	NMp	CHMP4C	charged multivesicular body protein 4C [Source:HGNC Symbol;Acc:HGNC:30599]
292	0.285270327	2.93E-256	NMp	HOOK1	hook microtubule tethering protein 1 [Source:HGNC Symbol;Acc:HGNC:19884]
293	0.422792169	9.08E-255	NMp	ASNS	asparagine synthetase (glutamine-hydrolyzing) [Source:HGNC Symbol;Acc:HGNC:753]
294	0.382456677	8.81E-254	NMp	MRPS12	mitochondrial ribosomal protein S12 [Source:HGNC Symbol;Acc:HGNC:10380]
295	0.313276289	2.62E-253	NMp	NHP2	NHP2 ribonucleoprotein [Source:HGNC Symbol;Acc:HGNC:14377]
296	0.32383029	5.01E-253	NMp	PGAM1	phosphoglycerate mutase 1 [Source:HGNC Symbol;Acc:HGNC:8888]
297	0.305269908	1.39E-251	NMp	FGFBP3	fibroblast growth factor binding protein 3 [Source:HGNC Symbol;Acc:HGNC:23428]
298	0.336675686	1.48E-251	NMp	CHEK2	checkpoint kinase 2 [Source:HGNC Symbol;Acc:HGNC:16627]
299	0.361667661	5.32E-249	NMp	SEPP1	NA
300	0.419286178	5.34E-247	NMp	HES1	hes family bHLH transcription factor 1 [Source:HGNC Symbol;Acc:HGNC:5192]
301	0.380736206	1.93E-243	NMp	CHCHD10	coiled-coil-helix-coiled-coil-helix domain containing 10 [Source:HGNC Symbol;Acc:HGNC:15559]
302	0.374396509	1.59E-240	NMp	RBPMS2	RNA binding protein, mRNA processing factor 2 [Source:HGNC Symbol;Acc:HGNC:19098]
303	0.387797395	1.14E-237	NMp	PIH1D1	PIH1 domain containing 1 [Source:HGNC Symbol;Acc:HGNC:26075]
304	0.283503737	3.24E-235	NMp	PSMB6	proteasome subunit beta 6 [Source:HGNC Symbol;Acc:HGNC:9543]
305	0.379890107	6.67E-234	NMp	JTB	jumping translocation breakpoint [Source:HGNC Symbol;Acc:HGNC:6201]
306	0.401491493	3.79E-233	NMp	HLA-C	major histocompatibility complex, class I, C [Source:HGNC Symbol;Acc:HGNC:4933]
307	0.358685843	2.61E-232	NMp	CAPN1	calpain 1 [Source:HGNC Symbol;Acc:HGNC:1476]
308	0.25335564	4.53E-232	NMp	PIK3CB	phosphatidylinositol-4,5-bisphosphate 3-kinase catalytic subunit beta [Source:HGNC Symbol;Acc:HGNC:8976]
309	0.40264941	2.61E-229	NMp	TUBA1C	tubulin alpha 1c [Source:HGNC Symbol;Acc:HGNC:20768]
310	0.286836226	2.66E-229	NMp	CLDN10	claudin 10 [Source:HGNC Symbol;Acc:HGNC:2033]
311	0.304591547	8.73E-229	NMp	HOOK2	hook microtubule tethering protein 2 [Source:HGNC Symbol;Acc:HGNC:19885]
312	0.269574925	1.74E-228	NMp	C14orf166	NA
313	0.269755806	2.43E-227	NMp	SSBP1	single stranded DNA binding protein 1 [Source:HGNC Symbol;Acc:HGNC:11317]
314	0.426192981	8.38E-227	NMp	HSD17B4	hydroxysteroid 17-beta dehydrogenase 4 [Source:HGNC Symbol;Acc:HGNC:5213]
315	0.391280046	4.38E-225	NMp	RPL39L	ribosomal protein L39 like [Source:HGNC Symbol;Acc:HGNC:17094]
316	0.311401532	1.45E-224	NMp	VANGL1	VANGL planar cell polarity protein 1 [Source:HGNC Symbol;Acc:HGNC:15512]
317	0.384315113	5.00E-224	NMp	TP53	tumor protein p53 [Source:HGNC Symbol;Acc:HGNC:11998]
318	0.277104906	2.81E-223	NMp	CDC42EP3	CDC42 effector protein 3 [Source:HGNC Symbol;Acc:HGNC:16943]
319	0.285717636	1.50E-222	NMp	MT-CO2	mitochondrially encoded cytochrome c oxidase II [Source:HGNC Symbol;Acc:HGNC:7421]
320	0.371732839	1.03E-220	NMp	RP11-660L16.2	NA
321	0.356455809	1.41E-220	NMp	DDX21	DExD-box helicase 21 [Source:HGNC Symbol;Acc:HGNC:2744]
322	0.410263442	1.77E-219	NMp	PSAT1	phosphoserine aminotransferase 1 [Source:HGNC Symbol;Acc:HGNC:19129]
323	0.310039407	6.48E-218	NMp	NDUFS8	NADH:ubiquinone oxidoreductase core subunit S8 [Source:HGNC Symbol;Acc:HGNC:7715]
324	0.41858422	9.85E-218	NMp	ZIC2	Zic family member 2 [Source:HGNC Symbol;Acc:HGNC:12873]
325	0.41239955	1.32E-217	NMp	PNP	purine nucleoside phosphorylase [Source:HGNC Symbol;Acc:HGNC:7892]
326	0.319928571	3.98E-216	NMp	SRM	spermidine synthase [Source:HGNC Symbol;Acc:HGNC:11296]
327	0.266476542	4.99E-213	NMp	GADD45GIP1	GADD45G interacting protein 1 [Source:HGNC Symbol;Acc:HGNC:29996]
328	0.348358769	3.21E-209	NMp	EEF1E1	eukaryotic translation elongation factor 1 epsilon 1 [Source:HGNC Symbol;Acc:HGNC:3212]
329	0.391652844	6.86E-209	NMp	CD320	CD320 molecule [Source:HGNC Symbol;Acc:HGNC:16692]
330	0.32376466	9.48E-207	NMp	WNT5B	Wnt family member 5B [Source:HGNC Symbol;Acc:HGNC:16265]
331	0.380044721	4.30E-206	NMp	SKIL	SKI like proto-oncogene [Source:HGNC Symbol;Acc:HGNC:10897]
332	0.285388687	2.17E-205	NMp	TMEM158	transmembrane protein 158 (gene/pseudogene) [Source:HGNC Symbol;Acc:HGNC:30293]
333	0.330110399	6.40E-204	NMp	SMIM14	small integral membrane protein 14 [Source:HGNC Symbol;Acc:HGNC:27321]
334	0.363790491	9.56E-203	NMp	SLC39A10	solute carrier family 39 member 10 [Source:HGNC Symbol;Acc:HGNC:20861]
335	0.327740539	1.52E-201	NMp	MRPL34	mitochondrial ribosomal protein L34 [Source:HGNC Symbol;Acc:HGNC:14488]
336	0.303784869	2.05E-201	NMp	SETD4	SET domain containing 4 [Source:HGNC Symbol;Acc:HGNC:1258]
337	0.303161031	2.02E-200	NMp	CD24	CD24 molecule [Source:HGNC Symbol;Acc:HGNC:1645]
338	0.254186839	1.10E-199	NMp	PDE9A	phosphodiesterase 9A [Source:HGNC Symbol;Acc:HGNC:8795]
339	0.341939944	1.24E-199	NMp	ADRM1	adhesion regulating molecule 1 [Source:HGNC Symbol;Acc:HGNC:15759]
340	0.333383178	1.81E-199	NMp	CCNB1IP1	cyclin B1 interacting protein 1 [Source:HGNC Symbol;Acc:HGNC:19437]
341	0.296405182	6.09E-198	NMp	FAM136A	family with sequence similarity 136 member A [Source:HGNC Symbol;Acc:HGNC:25911]
342	0.374559595	8.58E-197	NMp	COMTD1	catechol-O-methyltransferase domain containing 1 [Source:HGNC Symbol;Acc:HGNC:26309]
343	0.269906496	8.66E-196	NMp	SOCS2	suppressor of cytokine signaling 2 [Source:HGNC Symbol;Acc:HGNC:19382]
344	0.262137507	9.18E-196	NMp	NPDC1	neural proliferation, differentiation and control 1 [Source:HGNC Symbol;Acc:HGNC:7899]
345	0.330747615	9.89E-196	NMp	DUT	deoxyuridine triphosphatase [Source:HGNC Symbol;Acc:HGNC:3078]
346	0.252175343	3.00E-195	NMp	VASH2	vasohibin 2 [Source:HGNC Symbol;Acc:HGNC:25723]
347	0.308145333	2.21E-194	NMp	CH17-189H20.1	NA
348	0.268707006	8.64E-194	NMp	GCSH	glycine cleavage system protein H [Source:HGNC Symbol;Acc:HGNC:4208]
349	0.414523024	4.88E-193	NMp	MDN1	midasin AAA ATPase 1 [Source:HGNC Symbol;Acc:HGNC:18302]
350	0.256608543	4.50E-190	NMp	GSDMD	gasdermin D [Source:HGNC Symbol;Acc:HGNC:25697]
351	0.278910163	1.08E-189	NMp	GNG4	G protein subunit gamma 4 [Source:HGNC Symbol;Acc:HGNC:4407]
352	0.346084864	1.80E-189	NMp	SLC25A39	solute carrier family 25 member 39 [Source:HGNC Symbol;Acc:HGNC:24279]
353	0.359722598	2.58E-189	NMp	RNF5	ring finger protein 5 [Source:HGNC Symbol;Acc:HGNC:10068]
354	0.345651836	5.66E-189	NMp	PAK1	p21 (RAC1) activated kinase 1 [Source:HGNC Symbol;Acc:HGNC:8590]
355	0.334425924	4.64E-187	NMp	C16orf13	NA
356	0.259295676	7.99E-187	NMp	NOP10	NOP10 ribonucleoprotein [Source:HGNC Symbol;Acc:HGNC:14378]
357	0.271876479	1.69E-186	NMp	SRSF2	serine and arginine rich splicing factor 2 [Source:HGNC Symbol;Acc:HGNC:10783]
358	0.298347799	5.54E-186	NMp	VSIG10	V-set and immunoglobulin domain containing 10 [Source:HGNC Symbol;Acc:HGNC:26078]
359	0.25725601	8.65E-186	NMp	PDCD2L	programmed cell death 2 like [Source:HGNC Symbol;Acc:HGNC:28194]
360	0.298129794	2.51E-184	NMp	ECE2	endothelin converting enzyme 2 [Source:HGNC Symbol;Acc:HGNC:13275]
361	0.333454777	4.18E-184	NMp	BTF3L4	basic transcription factor 3 like 4 [Source:HGNC Symbol;Acc:HGNC:30547]
362	0.327265462	3.53E-183	NMp	VASP	vasodilator stimulated phosphoprotein [Source:HGNC Symbol;Acc:HGNC:12652]
363	0.311389788	3.98E-183	NMp	LARS	leucyl-tRNA synthetase [Source:HGNC Symbol;Acc:HGNC:6512]
364	0.275126079	4.16E-183	NMp	PPA1	pyrophosphatase (inorganic) 1 [Source:HGNC Symbol;Acc:HGNC:9226]
365	0.357238095	5.29E-182	NMp	PDHB	pyruvate dehydrogenase E1 beta subunit [Source:HGNC Symbol;Acc:HGNC:8808]
366	0.268556242	1.45E-181	NMp	EIF2S2	eukaryotic translation initiation factor 2 subunit beta [Source:HGNC Symbol;Acc:HGNC:3266]
367	0.260793504	2.45E-181	NMp	DLGAP1-AS2	DLGAP1 antisense RNA 2 [Source:HGNC Symbol;Acc:HGNC:28146]
368	0.264514564	2.47E-180	NMp	NDUFB7	NADH:ubiquinone oxidoreductase subunit B7 [Source:HGNC Symbol;Acc:HGNC:7702]
369	0.339478732	2.90E-179	NMp	CCNC	cyclin C [Source:HGNC Symbol;Acc:HGNC:1581]
370	0.30554766	6.01E-178	NMp	USP28	ubiquitin specific peptidase 28 [Source:HGNC Symbol;Acc:HGNC:12625]
371	0.355888497	1.05E-177	NMp	C21orf59	NA
372	0.25002385	1.06E-177	NMp	SYNE4	spectrin repeat containing nuclear envelope family member 4 [Source:HGNC Symbol;Acc:HGNC:26703]
373	0.329011246	4.05E-177	NMp	RP11-12G12.7	NA
374	0.323882229	1.21E-175	NMp	OAT	ornithine aminotransferase [Source:HGNC Symbol;Acc:HGNC:8091]
375	0.306164868	1.48E-175	NMp	BAX	BCL2 associated X, apoptosis regulator [Source:HGNC Symbol;Acc:HGNC:959]
376	0.347591183	1.88E-175	NMp	LAGE3	L antigen family member 3 [Source:HGNC Symbol;Acc:HGNC:26058]
377	0.310578593	1.95E-174	NMp	UBE2S	ubiquitin conjugating enzyme E2 S [Source:HGNC Symbol;Acc:HGNC:17895]
378	0.27269611	1.46E-173	NMp	TUBA4A	tubulin alpha 4a [Source:HGNC Symbol;Acc:HGNC:12407]
379	0.313404316	1.88E-173	NMp	MDH2	malate dehydrogenase 2 [Source:HGNC Symbol;Acc:HGNC:6971]
380	0.336113887	5.54E-172	NMp	EPB41L4A-AS1	EPB41L4A antisense RNA 1 [Source:HGNC Symbol;Acc:HGNC:30749]
381	0.296110705	7.19E-172	NMp	ATF7IP2	activating transcription factor 7 interacting protein 2 [Source:HGNC Symbol;Acc:HGNC:20397]
382	0.35259172	2.92E-171	NMp	COMMD7	COMM domain containing 7 [Source:HGNC Symbol;Acc:HGNC:16223]
383	0.327722653	6.55E-171	NMp	MYEF2	myelin expression factor 2 [Source:HGNC Symbol;Acc:HGNC:17940]
384	0.356015169	8.77E-171	NMp	MPP6	membrane palmitoylated protein 6 [Source:HGNC Symbol;Acc:HGNC:18167]
385	0.326269133	5.50E-170	NMp	IMP3	IMP U3 small nucleolar ribonucleoprotein 3 [Source:HGNC Symbol;Acc:HGNC:14497]
386	0.322249947	2.81E-169	NMp	CCDC85B	coiled-coil domain containing 85B [Source:HGNC Symbol;Acc:HGNC:24926]
387	0.266554781	4.30E-169	NMp	RP11-469A15.2	NA
388	0.340739094	9.77E-169	NMp	MFGE8	milk fat globule-EGF factor 8 protein [Source:HGNC Symbol;Acc:HGNC:7036]
389	0.326992437	1.06E-168	NMp	SAT2	spermidine/spermine N1-acetyltransferase family member 2 [Source:HGNC Symbol;Acc:HGNC:23160]
390	0.349515473	7.14E-168	NMp	SP5	Sp5 transcription factor [Source:HGNC Symbol;Acc:HGNC:14529]
391	0.284101928	1.50E-167	NMp	TUFM	Tu translation elongation factor, mitochondrial [Source:HGNC Symbol;Acc:HGNC:12420]
392	0.323807451	2.00E-166	NMp	NME3	NME/NM23 nucleoside diphosphate kinase 3 [Source:HGNC Symbol;Acc:HGNC:7851]
393	0.340892251	3.27E-166	NMp	TBL1XR1	transducin beta like 1 X-linked receptor 1 [Source:HGNC Symbol;Acc:HGNC:29529]
394	0.350742435	1.66E-164	NMp	ID3	inhibitor of DNA binding 3, HLH protein [Source:HGNC Symbol;Acc:HGNC:5362]
395	0.332535604	5.45E-164	NMp	C12orf45	chromosome 12 open reading frame 45 [Source:HGNC Symbol;Acc:HGNC:28628]
396	0.304232018	1.31E-163	NMp	ZNF677	zinc finger protein 677 [Source:HGNC Symbol;Acc:HGNC:28730]
397	0.315391579	3.56E-161	NMp	ALG3	ALG3 alpha-1,3- mannosyltransferase [Source:HGNC Symbol;Acc:HGNC:23056]
398	0.281215032	5.72E-161	NMp	AES	NA
399	0.323037614	6.52E-161	NMp	SLC39A1	solute carrier family 39 member 1 [Source:HGNC Symbol;Acc:HGNC:12876]
400	0.326708025	9.16E-161	NMp	EXOSC5	exosome component 5 [Source:HGNC Symbol;Acc:HGNC:24662]
401	0.309133806	2.39E-160	NMp	EIF6	eukaryotic translation initiation factor 6 [Source:HGNC Symbol;Acc:HGNC:6159]
402	0.306680252	1.84E-159	NMp	ARG2	arginase 2 [Source:HGNC Symbol;Acc:HGNC:664]
403	0.319474998	5.68E-159	NMp	CEBPZ	CCAAT enhancer binding protein zeta [Source:HGNC Symbol;Acc:HGNC:24218]
404	0.299767704	1.11E-157	NMp	BCL2L12	BCL2 like 12 [Source:HGNC Symbol;Acc:HGNC:13787]
405	0.264370925	1.11E-156	NMp	SALL3	spalt like transcription factor 3 [Source:HGNC Symbol;Acc:HGNC:10527]
406	0.306461144	3.14E-156	NMp	MFSD3	major facilitator superfamily domain containing 3 [Source:HGNC Symbol;Acc:HGNC:25157]
407	0.271039156	6.88E-156	NMp	CLMP	CXADR like membrane protein [Source:HGNC Symbol;Acc:HGNC:24039]
408	0.308209412	7.16E-156	NMp	ITPA	inosine triphosphatase [Source:HGNC Symbol;Acc:HGNC:6176]
409	0.257592274	1.70E-155	NMp	PACSIN3	protein kinase C and casein kinase substrate in neurons 3 [Source:HGNC Symbol;Acc:HGNC:8572]
410	0.308836543	8.37E-155	NMp	FKBP5	FKBP prolyl isomerase 5 [Source:HGNC Symbol;Acc:HGNC:3721]
411	0.315116743	3.13E-153	NMp	MRPL4	mitochondrial ribosomal protein L4 [Source:HGNC Symbol;Acc:HGNC:14276]
412	0.289817611	6.13E-153	NMp	GABRB3	gamma-aminobutyric acid type A receptor beta3 subunit [Source:HGNC Symbol;Acc:HGNC:4083]
413	0.316807129	6.98E-153	NMp	C19orf24	NA
414	0.308546273	1.02E-152	NMp	ALPL	alkaline phosphatase, biomineralization associated [Source:HGNC Symbol;Acc:HGNC:438]
415	0.251541879	1.91E-152	NMp	ABHD11	abhydrolase domain containing 11 [Source:HGNC Symbol;Acc:HGNC:16407]
416	0.324283478	5.40E-152	NMp	CDKN3	cyclin dependent kinase inhibitor 3 [Source:HGNC Symbol;Acc:HGNC:1791]
417	0.284459471	1.06E-150	NMp	ETV4	ETS variant 4 [Source:HGNC Symbol;Acc:HGNC:3493]
418	0.258723396	2.33E-150	NMp	FLVCR1-AS1	NA
419	0.323525428	1.07E-149	NMp	MAF1	MAF1 homolog, negative regulator of RNA polymerase III [Source:HGNC Symbol;Acc:HGNC:24966]
420	0.299179928	2.55E-149	NMp	KCNG1	potassium voltage-gated channel modifier subfamily G member 1 [Source:HGNC Symbol;Acc:HGNC:6248]
421	0.344264796	3.00E-149	NMp	REST	RE1 silencing transcription factor [Source:HGNC Symbol;Acc:HGNC:9966]
422	0.28045339	3.49E-149	NMp	CYC1	cytochrome c1 [Source:HGNC Symbol;Acc:HGNC:2579]
423	0.263778409	3.59E-149	NMp	RGS16	regulator of G protein signaling 16 [Source:HGNC Symbol;Acc:HGNC:9997]
424	0.258130107	1.35E-148	NMp	TRMT112	tRNA methyltransferase subunit 11-2 [Source:HGNC Symbol;Acc:HGNC:26940]
425	0.280321793	9.29E-148	NMp	RP11-849I19.1	NA
426	0.270018046	1.65E-147	NMp	POLR1D	RNA polymerase I and III subunit D [Source:HGNC Symbol;Acc:HGNC:20422]
427	0.308649218	2.03E-147	NMp	ZFAND6	zinc finger AN1-type containing 6 [Source:HGNC Symbol;Acc:HGNC:30164]
428	0.267825689	5.92E-146	NMp	YWHAH	tyrosine 3-monooxygenase/tryptophan 5-monooxygenase activation protein eta [Source:HGNC Symbol;Acc:HGNC:12853]
429	0.272293387	1.73E-145	NMp	ADAMTS19	ADAM metallopeptidase with thrombospondin type 1 motif 19 [Source:HGNC Symbol;Acc:HGNC:17111]
430	0.27786297	5.64E-145	NMp	POLR2H	RNA polymerase II subunit H [Source:HGNC Symbol;Acc:HGNC:9195]
431	0.25801516	7.40E-145	NMp	CARHSP1	calcium regulated heat stable protein 1 [Source:HGNC Symbol;Acc:HGNC:17150]
432	0.259204524	6.88E-144	NMp	PCAT14	prostate cancer associated transcript 14 [Source:HGNC Symbol;Acc:HGNC:48977]
433	0.293609774	1.55E-143	NMp	ZNF121	zinc finger protein 121 [Source:HGNC Symbol;Acc:HGNC:12904]
434	0.297621744	1.25E-142	NMp	NTHL1	nth like DNA glycosylase 1 [Source:HGNC Symbol;Acc:HGNC:8028]
435	0.319575956	2.32E-142	NMp	SREK1IP1	SREK1 interacting protein 1 [Source:HGNC Symbol;Acc:HGNC:26716]
436	0.265029175	1.09E-141	NMp	MT-ATP6	mitochondrially encoded ATP synthase membrane subunit 6 [Source:HGNC Symbol;Acc:HGNC:7414]
437	0.312131602	2.62E-141	NMp	RTN3	reticulon 3 [Source:HGNC Symbol;Acc:HGNC:10469]
438	0.312262005	5.79E-140	NMp	ADSS	adenylosuccinate synthase [Source:HGNC Symbol;Acc:HGNC:292]
439	0.273989152	1.08E-139	NMp	ENSA	endosulfine alpha [Source:HGNC Symbol;Acc:HGNC:3360]
440	0.254952738	3.02E-139	NMp	PLSCR1	phospholipid scramblase 1 [Source:HGNC Symbol;Acc:HGNC:9092]
441	0.275821001	1.53E-138	NMp	AKR1A1	aldo-keto reductase family 1 member A1 [Source:HGNC Symbol;Acc:HGNC:380]
442	0.296067583	2.15E-138	NMp	RPS27L	ribosomal protein S27 like [Source:HGNC Symbol;Acc:HGNC:18476]
443	0.252390404	6.32E-138	NMp	PSMB3	proteasome subunit beta 3 [Source:HGNC Symbol;Acc:HGNC:9540]
444	0.25185854	1.72E-137	NMp	SSU72	SSU72 homolog, RNA polymerase II CTD phosphatase [Source:HGNC Symbol;Acc:HGNC:25016]
445	0.294590426	2.21E-137	NMp	POLR3K	RNA polymerase III subunit K [Source:HGNC Symbol;Acc:HGNC:14121]
446	0.273702153	1.03E-136	NMp	MRPL12	mitochondrial ribosomal protein L12 [Source:HGNC Symbol;Acc:HGNC:10378]
447	0.276048675	3.45E-136	NMp	METTL21A	methyltransferase like 21A [Source:HGNC Symbol;Acc:HGNC:30476]
448	0.29613507	4.42E-136	NMp	AIF1L	allograft inflammatory factor 1 like [Source:HGNC Symbol;Acc:HGNC:28904]
449	0.265953567	5.53E-136	NMp	UQCRFS1	ubiquinol-cytochrome c reductase, Rieske iron-sulfur polypeptide 1 [Source:HGNC Symbol;Acc:HGNC:12587]
450	0.271432763	1.54E-135	NMp	MKRN1	makorin ring finger protein 1 [Source:HGNC Symbol;Acc:HGNC:7112]
451	0.25744875	3.78E-135	NMp	SRSF7	serine and arginine rich splicing factor 7 [Source:HGNC Symbol;Acc:HGNC:10789]
452	0.302955573	9.60E-135	NMp	SDHD	succinate dehydrogenase complex subunit D [Source:HGNC Symbol;Acc:HGNC:10683]
453	0.27873019	3.63E-134	NMp	MRPL32	mitochondrial ribosomal protein L32 [Source:HGNC Symbol;Acc:HGNC:14035]
454	0.268302693	4.84E-134	NMp	HEBP1	heme binding protein 1 [Source:HGNC Symbol;Acc:HGNC:17176]
455	0.270765482	3.61E-132	NMp	SMCO4	single-pass membrane protein with coiled-coil domains 4 [Source:HGNC Symbol;Acc:HGNC:24810]
456	0.2619826	7.96E-132	NMp	APCDD1	APC down-regulated 1 [Source:HGNC Symbol;Acc:HGNC:15718]
457	0.255365267	2.04E-131	NMp	HACL1	2-hydroxyacyl-CoA lyase 1 [Source:HGNC Symbol;Acc:HGNC:17856]
458	0.272544915	2.60E-131	NMp	RAC3	Rac family small GTPase 3 [Source:HGNC Symbol;Acc:HGNC:9803]
459	0.282637466	1.25E-130	NMp	PLTP	phospholipid transfer protein [Source:HGNC Symbol;Acc:HGNC:9093]
460	0.267255505	1.61E-130	NMp	LSM6	LSM6 homolog, U6 small nuclear RNA and mRNA degradation associated [Source:HGNC Symbol;Acc:HGNC:17017]
461	0.294608263	2.55E-130	NMp	AGTRAP	angiotensin II receptor associated protein [Source:HGNC Symbol;Acc:HGNC:13539]
462	0.303202073	4.65E-130	NMp	STRBP	spermatid perinuclear RNA binding protein [Source:HGNC Symbol;Acc:HGNC:16462]
463	0.322568991	6.22E-130	NMp	KIAA1551	NA
464	0.276692012	3.15E-129	NMp	NARS	asparaginyl-tRNA synthetase [Source:HGNC Symbol;Acc:HGNC:7643]
465	0.293394214	5.14E-129	NMp	NDUFAF4	NADH:ubiquinone oxidoreductase complex assembly factor 4 [Source:HGNC Symbol;Acc:HGNC:21034]
466	0.252972358	7.17E-129	NMp	SRD5A3	steroid 5 alpha-reductase 3 [Source:HGNC Symbol;Acc:HGNC:25812]
467	0.299496929	2.42E-128	NMp	TSTD1	thiosulfate sulfurtransferase like domain containing 1 [Source:HGNC Symbol;Acc:HGNC:35410]
468	0.277031693	1.27E-127	NMp	DCUN1D5	defective in cullin neddylation 1 domain containing 5 [Source:HGNC Symbol;Acc:HGNC:28409]
469	0.252558559	2.14E-127	NMp	MRPS26	mitochondrial ribosomal protein S26 [Source:HGNC Symbol;Acc:HGNC:14045]
470	0.267526102	2.26E-127	NMp	COA4	cytochrome c oxidase assembly factor 4 homolog [Source:HGNC Symbol;Acc:HGNC:24604]
471	0.287865929	9.76E-127	NMp	IFITM3	interferon induced transmembrane protein 3 [Source:HGNC Symbol;Acc:HGNC:5414]
472	0.261304195	4.00E-126	NMp	SSNA1	SS nuclear autoantigen 1 [Source:HGNC Symbol;Acc:HGNC:11321]
473	0.293272718	4.42E-126	NMp	NOP16	NOP16 nucleolar protein [Source:HGNC Symbol;Acc:HGNC:26934]
474	0.295998577	1.09E-124	NMp	ADSL	adenylosuccinate lyase [Source:HGNC Symbol;Acc:HGNC:291]
475	0.297025721	1.82E-124	NMp	STK26	serine/threonine kinase 26 [Source:HGNC Symbol;Acc:HGNC:18174]
476	0.308775322	2.12E-124	NMp	MAP3K4	mitogen-activated protein kinase kinase kinase 4 [Source:HGNC Symbol;Acc:HGNC:6856]
477	0.268867986	1.08E-123	NMp	PGAP2	post-GPI attachment to proteins 2 [Source:HGNC Symbol;Acc:HGNC:17893]
478	0.280669793	4.88E-122	NMp	AGO2	argonaute RISC catalytic component 2 [Source:HGNC Symbol;Acc:HGNC:3263]
479	0.256680787	1.81E-121	NMp	PNRC1	proline rich nuclear receptor coactivator 1 [Source:HGNC Symbol;Acc:HGNC:17278]
480	0.320020839	2.40E-121	NMp	BOD1L1	biorientation of chromosomes in cell division 1 like 1 [Source:HGNC Symbol;Acc:HGNC:31792]
481	0.291934529	3.95E-121	NMp	TSTA3	tissue specific transplantation antigen P35B [Source:HGNC Symbol;Acc:HGNC:12390]
482	0.291310058	7.25E-121	NMp	UNG	uracil DNA glycosylase [Source:HGNC Symbol;Acc:HGNC:12572]
483	0.315495654	9.45E-121	NMp	MRS2	magnesium transporter MRS2 [Source:HGNC Symbol;Acc:HGNC:13785]
484	0.254927993	1.07E-120	NMp	POP7	POP7 homolog, ribonuclease P/MRP subunit [Source:HGNC Symbol;Acc:HGNC:19949]
485	0.260917717	1.58E-119	NMp	NR2F6	nuclear receptor subfamily 2 group F member 6 [Source:HGNC Symbol;Acc:HGNC:7977]
486	0.285244576	2.49E-119	NMp	PSMG4	proteasome assembly chaperone 4 [Source:HGNC Symbol;Acc:HGNC:21108]
487	0.273413583	6.08E-118	NMp	SKA3	spindle and kinetochore associated complex subunit 3 [Source:HGNC Symbol;Acc:HGNC:20262]
488	0.263376525	2.43E-117	NMp	CCDC112	coiled-coil domain containing 112 [Source:HGNC Symbol;Acc:HGNC:28599]
489	0.27948413	6.91E-117	NMp	TGIF1	TGFB induced factor homeobox 1 [Source:HGNC Symbol;Acc:HGNC:11776]
490	0.276048	2.25E-116	NMp	MRPL16	mitochondrial ribosomal protein L16 [Source:HGNC Symbol;Acc:HGNC:14476]
491	0.279603877	2.89E-116	NMp	PSME1	proteasome activator subunit 1 [Source:HGNC Symbol;Acc:HGNC:9568]
492	0.299343888	1.99E-115	NMp	LIMA1	LIM domain and actin binding 1 [Source:HGNC Symbol;Acc:HGNC:24636]
493	0.286378099	4.63E-115	NMp	NUDCD1	NudC domain containing 1 [Source:HGNC Symbol;Acc:HGNC:24306]
494	0.271804467	7.25E-114	NMp	CTBP2	C-terminal binding protein 2 [Source:HGNC Symbol;Acc:HGNC:2495]
495	0.287668555	4.50E-112	NMp	DKC1	dyskerin pseudouridine synthase 1 [Source:HGNC Symbol;Acc:HGNC:2890]
496	0.27589771	7.43E-112	NMp	RCC2	regulator of chromosome condensation 2 [Source:HGNC Symbol;Acc:HGNC:30297]
497	0.26930178	2.29E-111	NMp	LYAR	Ly1 antibody reactive [Source:HGNC Symbol;Acc:HGNC:26021]
498	0.270799862	1.81E-110	NMp	HSPB1	heat shock protein family B (small) member 1 [Source:HGNC Symbol;Acc:HGNC:5246]
499	0.281525355	4.08E-110	NMp	MTHFD2	methylenetetrahydrofolate dehydrogenase (NADP+ dependent) 2, methenyltetrahydrofolate cyclohydrolase [Source:HGNC Symbol;Acc:HGNC:7434]
500	0.27714214	6.16E-110	NMp	FNBP1L	formin binding protein 1 like [Source:HGNC Symbol;Acc:HGNC:20851]
501	0.26907605	1.25E-109	NMp	TRIP6	thyroid hormone receptor interactor 6 [Source:HGNC Symbol;Acc:HGNC:12311]
502	0.267444946	1.73E-109	NMp	PSMD7	proteasome 26S subunit, non-ATPase 7 [Source:HGNC Symbol;Acc:HGNC:9565]
503	0.263361385	2.94E-107	NMp	MRPL17	mitochondrial ribosomal protein L17 [Source:HGNC Symbol;Acc:HGNC:14053]
504	0.261310634	5.38E-106	NMp	KRAS	KRAS proto-oncogene, GTPase [Source:HGNC Symbol;Acc:HGNC:6407]
505	0.269428788	6.96E-106	NMp	PAK1IP1	PAK1 interacting protein 1 [Source:HGNC Symbol;Acc:HGNC:20882]
506	0.278856072	4.39E-102	NMp	MCM5	minichromosome maintenance complex component 5 [Source:HGNC Symbol;Acc:HGNC:6948]
507	0.259298927	1.49E-101	NMp	MAD2L2	mitotic arrest deficient 2 like 2 [Source:HGNC Symbol;Acc:HGNC:6764]
508	0.251395137	6.17E-101	NMp	PDCD2	programmed cell death 2 [Source:HGNC Symbol;Acc:HGNC:8762]
509	0.253460679	3.65E-100	NMp	WBSCR22	NA
510	0.264384296	9.87E-100	NMp	NLN	neurolysin [Source:HGNC Symbol;Acc:HGNC:16058]
511	0.251295836	3.78E-98	NMp	BST2	bone marrow stromal cell antigen 2 [Source:HGNC Symbol;Acc:HGNC:1119]
512	0.250799847	1.06E-96	NMp	MRPL28	mitochondrial ribosomal protein L28 [Source:HGNC Symbol;Acc:HGNC:14484]
513	0.259566324	1.25E-96	NMp	WEE1	WEE1 G2 checkpoint kinase [Source:HGNC Symbol;Acc:HGNC:12761]
514	0.261055344	2.46E-96	NMp	PTPN12	protein tyrosine phosphatase non-receptor type 12 [Source:HGNC Symbol;Acc:HGNC:9645]
515	0.254463	5.81E-96	NMp	NOSIP	nitric oxide synthase interacting protein [Source:HGNC Symbol;Acc:HGNC:17946]
516	0.263926785	2.05E-95	NMp	SPATS2L	spermatogenesis associated serine rich 2 like [Source:HGNC Symbol;Acc:HGNC:24574]
517	0.252274316	1.24E-94	NMp	BRIX1	biogenesis of ribosomes BRX1 [Source:HGNC Symbol;Acc:HGNC:24170]
518	0.274580971	3.12E-92	NMp	ACVR2B	activin A receptor type 2B [Source:HGNC Symbol;Acc:HGNC:174]
519	0.265099878	6.23E-89	NMp	MSH2	mutS homolog 2 [Source:HGNC Symbol;Acc:HGNC:7325]
520	0.36508442	2.47E-85	NMp	UBE2C	ubiquitin conjugating enzyme E2 C [Source:HGNC Symbol;Acc:HGNC:15937]
521	0.252529699	1.47E-81	NMp	BEX4	brain expressed X-linked 4 [Source:HGNC Symbol;Acc:HGNC:25475]
522	1.045836993	2.66E-122	Late NMp	LRRC75A	leucine rich repeat containing 75A [Source:HGNC Symbol;Acc:HGNC:32403]
523	0.777172705	3.92E-82	Late NMp	L1TD1	LINE1 type transposase domain containing 1 [Source:HGNC Symbol;Acc:HGNC:25595]
524	0.666052172	1.91E-80	Late NMp	EPCAM	epithelial cell adhesion molecule [Source:HGNC Symbol;Acc:HGNC:11529]
525	0.624571242	1.01E-63	Late NMp	POU5F1	POU class 5 homeobox 1 [Source:HGNC Symbol;Acc:HGNC:9221]
526	0.801066033	1.02E-54	Late NMp	SERPINB9	serpin family B member 9 [Source:HGNC Symbol;Acc:HGNC:8955]
527	0.456790489	5.72E-49	Late NMp	NODAL	nodal growth differentiation factor [Source:HGNC Symbol;Acc:HGNC:7865]
528	0.451646827	4.00E-47	Late NMp	CNTNAP2	contactin associated protein like 2 [Source:HGNC Symbol;Acc:HGNC:13830]
529	0.264973834	1.96E-41	Late NMp	SET	SET nuclear proto-oncogene [Source:HGNC Symbol;Acc:HGNC:10760]
530	0.51928994	2.55E-41	Late NMp	SFRP2	secreted frizzled related protein 2 [Source:HGNC Symbol;Acc:HGNC:10777]
531	0.427553078	2.72E-41	Late NMp	NQO2	N-ribosyldihydronicotinamide:quinone reductase 2 [Source:HGNC Symbol;Acc:HGNC:7856]
532	0.640134073	3.78E-40	Late NMp	MTRNR2L12	MT-RNR2 like 12 [Source:HGNC Symbol;Acc:HGNC:37169]
533	0.309049545	5.60E-39	Late NMp	HMGA1	high mobility group AT-hook 1 [Source:HGNC Symbol;Acc:HGNC:5010]
534	0.498175668	3.55E-38	Late NMp	CASP3	caspase 3 [Source:HGNC Symbol;Acc:HGNC:1504]
535	0.306232493	5.72E-32	Late NMp	HSPA8	heat shock protein family A (Hsp70) member 8 [Source:HGNC Symbol;Acc:HGNC:5241]
536	0.325404363	3.95E-30	Late NMp	APOE	apolipoprotein E [Source:HGNC Symbol;Acc:HGNC:613]
537	0.263123353	6.57E-30	Late NMp	HSPD1	heat shock protein family D (Hsp60) member 1 [Source:HGNC Symbol;Acc:HGNC:5261]
538	0.25893068	6.77E-28	Late NMp	TUBB2B	tubulin beta 2B class IIb [Source:HGNC Symbol;Acc:HGNC:30829]
539	0.4100717	6.78E-28	Late NMp	DPPA4	developmental pluripotency associated 4 [Source:HGNC Symbol;Acc:HGNC:19200]
540	0.346900811	1.14E-27	Late NMp	ATP5H	NA
541	0.274759792	1.70E-26	Late NMp	NCL	nucleolin [Source:HGNC Symbol;Acc:HGNC:7667]
542	0.405182373	9.87E-26	Late NMp	HNRNPH1	heterogeneous nuclear ribonucleoprotein H1 [Source:HGNC Symbol;Acc:HGNC:5041]
543	0.331054582	7.54E-25	Late NMp	CLDN6	claudin 6 [Source:HGNC Symbol;Acc:HGNC:2048]
544	0.381114035	8.80E-25	Late NMp	UGP2	UDP-glucose pyrophosphorylase 2 [Source:HGNC Symbol;Acc:HGNC:12527]
545	0.479052759	1.60E-23	Late NMp	CTNNB1	catenin beta 1 [Source:HGNC Symbol;Acc:HGNC:2514]
546	0.262706049	6.89E-23	Late NMp	TMSB4X	thymosin beta 4 X-linked [Source:HGNC Symbol;Acc:HGNC:11881]
547	0.368592351	5.84E-22	Late NMp	MDN1	midasin AAA ATPase 1 [Source:HGNC Symbol;Acc:HGNC:18302]
548	0.386021566	8.91E-22	Late NMp	KIAA1551	NA
549	0.267035248	9.49E-22	Late NMp	MIXL1	Mix paired-like homeobox [Source:HGNC Symbol;Acc:HGNC:13363]
550	0.354883663	1.68E-20	Late NMp	BUB1	BUB1 mitotic checkpoint serine/threonine kinase [Source:HGNC Symbol;Acc:HGNC:1148]
551	0.349441354	8.44E-20	Late NMp	FAM162A	family with sequence similarity 162 member A [Source:HGNC Symbol;Acc:HGNC:17865]
552	0.287274917	2.22E-19	Late NMp	CBR1	carbonyl reductase 1 [Source:HGNC Symbol;Acc:HGNC:1548]
553	0.267013174	9.76E-18	Late NMp	T	NA
554	0.321466231	3.92E-17	Late NMp	NIPA2	NIPA magnesium transporter 2 [Source:HGNC Symbol;Acc:HGNC:17044]
555	0.305716781	6.27E-17	Late NMp	STRBP	spermatid perinuclear RNA binding protein [Source:HGNC Symbol;Acc:HGNC:16462]
556	0.292019045	2.16E-16	Late NMp	TRA2A	transformer 2 alpha homolog [Source:HGNC Symbol;Acc:HGNC:16645]
557	0.286569054	4.55E-16	Late NMp	HIST1H2AG	histone cluster 1 H2A family member g [Source:HGNC Symbol;Acc:HGNC:4737]
558	0.283810783	4.72E-16	Late NMp	HIST1H3B	histone cluster 1 H3 family member b [Source:HGNC Symbol;Acc:HGNC:4776]
559	0.272659728	7.37E-16	Late NMp	HIST1H1E	histone cluster 1 H1 family member e [Source:HGNC Symbol;Acc:HGNC:4718]
560	0.318756959	5.99E-15	Late NMp	SLC3A2	solute carrier family 3 member 2 [Source:HGNC Symbol;Acc:HGNC:11026]
561	0.569475862	3.94E-14	Late NMp	PTPRZ1	protein tyrosine phosphatase receptor type Z1 [Source:HGNC Symbol;Acc:HGNC:9685]
562	0.269154171	8.26E-14	Late NMp	LSR	lipolysis stimulated lipoprotein receptor [Source:HGNC Symbol;Acc:HGNC:29572]
563	0.333176854	2.60E-13	Late NMp	RARRES2	retinoic acid receptor responder 2 [Source:HGNC Symbol;Acc:HGNC:9868]
564	0.317009421	3.03E-13	Late NMp	HSD17B4	hydroxysteroid 17-beta dehydrogenase 4 [Source:HGNC Symbol;Acc:HGNC:5213]
565	0.257055309	1.06E-12	Late NMp	SEMA6A	semaphorin 6A [Source:HGNC Symbol;Acc:HGNC:10738]
566	0.2958451	1.43E-12	Late NMp	EZR	ezrin [Source:HGNC Symbol;Acc:HGNC:12691]
567	0.264008507	8.29E-12	Late NMp	IDH1	isocitrate dehydrogenase (NADP(+)) 1, cytosolic [Source:HGNC Symbol;Acc:HGNC:5382]
568	0.257971254	9.90E-12	Late NMp	UCHL1	ubiquitin C-terminal hydrolase L1 [Source:HGNC Symbol;Acc:HGNC:12513]
569	0.279221599	2.50E-11	Late NMp	CTC-260E6.6	NA
570	0.259547239	1.24E-10	Late NMp	HSPA5	heat shock protein family A (Hsp70) member 5 [Source:HGNC Symbol;Acc:HGNC:5238]
571	0.269148267	1.71E-10	Late NMp	SEPHS1	selenophosphate synthetase 1 [Source:HGNC Symbol;Acc:HGNC:19685]
572	0.259037687	1.99E-10	Late NMp	MGST1	microsomal glutathione S-transferase 1 [Source:HGNC Symbol;Acc:HGNC:7061]
573	0.256358929	2.73E-10	Late NMp	HSPA9	heat shock protein family A (Hsp70) member 9 [Source:HGNC Symbol;Acc:HGNC:5244]
574	0.286775741	3.80E-10	Late NMp	ARFGEF1	ADP ribosylation factor guanine nucleotide exchange factor 1 [Source:HGNC Symbol;Acc:HGNC:15772]
575	0.454395175	4.04E-10	Late NMp	PLCG2	phospholipase C gamma 2 [Source:HGNC Symbol;Acc:HGNC:9066]
576	0.251172874	2.39E-09	Late NMp	MTHFD1	methylenetetrahydrofolate dehydrogenase, cyclohydrolase and formyltetrahydrofolate synthetase 1 [Source:HGNC Symbol;Acc:HGNC:7432]
577	0.269636332	2.63E-09	Late NMp	EIF2S3	eukaryotic translation initiation factor 2 subunit gamma [Source:HGNC Symbol;Acc:HGNC:3267]
578	0.457513682	8.96E-09	Late NMp	TDGF1	teratocarcinoma-derived growth factor 1 [Source:HGNC Symbol;Acc:HGNC:11701]
579	0.268050716	3.30E-08	Late NMp	RP11-568A7.4	NA
580	0.435290099	1.43E-07	Late NMp	B3GNT7	UDP-GlcNAc:betaGal beta-1,3-N-acetylglucosaminyltransferase 7 [Source:HGNC Symbol;Acc:HGNC:18811]
581	0.266418293	2.86E-07	Late NMp	SMARCAD1	SWI/SNF-related, matrix-associated actin-dependent regulator of chromatin, subfamily a, containing DEAD/H box 1 [Source:HGNC Symbol;Acc:HGNC:18398]
582	0.264514581	3.13E-07	Late NMp	FNBP1L	formin binding protein 1 like [Source:HGNC Symbol;Acc:HGNC:20851]
583	0.473769284	3.92E-07	Late NMp	PLA2G16	NA
584	0.252809713	4.69E-07	Late NMp	LARS	leucyl-tRNA synthetase [Source:HGNC Symbol;Acc:HGNC:6512]
585	0.365890919	5.33E-07	Late NMp	NANOG	Nanog homeobox [Source:HGNC Symbol;Acc:HGNC:20857]
586	0.25702814	1.04E-06	Late NMp	PSAT1	phosphoserine aminotransferase 1 [Source:HGNC Symbol;Acc:HGNC:19129]
587	0.446277304	1.31E-06	Late NMp	CTC-425F1.4	NA
588	0.322465134	1.38E-06	Late NMp	LIN28A	lin-28 homolog A [Source:HGNC Symbol;Acc:HGNC:15986]
589	0.328432919	4.94E-06	Late NMp	DKK4	dickkopf WNT signaling pathway inhibitor 4 [Source:HGNC Symbol;Acc:HGNC:2894]
590	0.431095823	9.77E-05	Late NMp	NFE2L3	nuclear factor, erythroid 2 like 3 [Source:HGNC Symbol;Acc:HGNC:7783]
591	0.282691982	0.002597802	Late NMp	SKIL	SKI like proto-oncogene [Source:HGNC Symbol;Acc:HGNC:10897]
592	0.320696139	0.871944044	Late NMp	CDH1	cadherin 1 [Source:HGNC Symbol;Acc:HGNC:1748]
593	0.28848289	1	Late NMp	CLU	clusterin [Source:HGNC Symbol;Acc:HGNC:2095]
594	0.271868356	1	Late NMp	DCLK1	doublecortin like kinase 1 [Source:HGNC Symbol;Acc:HGNC:2700]
595	0.281848712	1	Late NMp	CLDN7	claudin 7 [Source:HGNC Symbol;Acc:HGNC:2049]
596	0.326990779	1	Late NMp	DSEL	dermatan sulfate epimerase like [Source:HGNC Symbol;Acc:HGNC:18144]
597	1.722411098	0	Early_pPSM	ANXA1	annexin A1 [Source:HGNC Symbol;Acc:HGNC:533]
598	1.498388647	0	Early_pPSM	ANXA3	annexin A3 [Source:HGNC Symbol;Acc:HGNC:541]
599	0.824066883	0	Early_pPSM	RP11-598D14.1	NA
600	0.460697975	0	Early_pPSM	TNC	tenascin C [Source:HGNC Symbol;Acc:HGNC:5318]
601	0.262175317	0	Early_pPSM	CTXN3	cortexin 3 [Source:HGNC Symbol;Acc:HGNC:31110]
602	1.426278101	2.67E-258	Early_pPSM	ACTA1	actin alpha 1, skeletal muscle [Source:HGNC Symbol;Acc:HGNC:129]
603	0.863027116	7.88E-244	Early_pPSM	LINC00152	NA
604	0.338943885	2.15E-219	Early_pPSM	SOX3	SRY-box transcription factor 3 [Source:HGNC Symbol;Acc:HGNC:11199]
605	1.057704463	1.12E-214	Early_pPSM	MYL7	myosin light chain 7 [Source:HGNC Symbol;Acc:HGNC:21719]
606	1.128549131	2.44E-196	Early_pPSM	GLIPR1	GLI pathogenesis related 1 [Source:HGNC Symbol;Acc:HGNC:17001]
607	0.771146454	9.65E-190	Early_pPSM	RP3-467D16.3	NA
608	0.573306781	8.60E-183	Early_pPSM	CAV1	caveolin 1 [Source:HGNC Symbol;Acc:HGNC:1527]
609	0.445580233	3.53E-180	Early_pPSM	HSPB8	heat shock protein family B (small) member 8 [Source:HGNC Symbol;Acc:HGNC:30171]
610	1.035588449	2.36E-170	Early_pPSM	LYPD1	LY6/PLAUR domain containing 1 [Source:HGNC Symbol;Acc:HGNC:28431]
611	0.404588839	2.80E-157	Early_pPSM	PTRF	NA
612	1.149550531	1.08E-153	Early_pPSM	PHLDA2	pleckstrin homology like domain family A member 2 [Source:HGNC Symbol;Acc:HGNC:12385]
613	0.729737263	1.40E-150	Early_pPSM	CNN1	calponin 1 [Source:HGNC Symbol;Acc:HGNC:2155]
614	0.925377081	3.59E-142	Early_pPSM	KIF1A	kinesin family member 1A [Source:HGNC Symbol;Acc:HGNC:888]
615	0.700067063	3.46E-139	Early_pPSM	NMRK2	nicotinamide riboside kinase 2 [Source:HGNC Symbol;Acc:HGNC:17871]
616	0.731803414	5.39E-139	Early_pPSM	LINC01405	long intergenic non-protein coding RNA 1405 [Source:HGNC Symbol;Acc:HGNC:50688]
617	1.894354518	6.27E-139	Early_pPSM	GAL	galanin and GMAP prepropeptide [Source:HGNC Symbol;Acc:HGNC:4114]
618	1.506958012	3.73E-135	Early_pPSM	SERPINE2	serpin family E member 2 [Source:HGNC Symbol;Acc:HGNC:8951]
619	1.389099812	4.03E-133	Early_pPSM	S100A10	S100 calcium binding protein A10 [Source:HGNC Symbol;Acc:HGNC:10487]
620	0.630012022	4.44E-133	Early_pPSM	RP11-69I8.2	NA
621	0.628377131	1.09E-128	Early_pPSM	LIMCH1	LIM and calponin homology domains 1 [Source:HGNC Symbol;Acc:HGNC:29191]
622	0.981499111	3.94E-128	Early_pPSM	WNT5B	Wnt family member 5B [Source:HGNC Symbol;Acc:HGNC:16265]
623	1.666600094	6.37E-127	Early_pPSM	TAGLN	transgelin [Source:HGNC Symbol;Acc:HGNC:11553]
624	1.135106294	1.63E-124	Early_pPSM	TUBB2A	tubulin beta 2A class IIa [Source:HGNC Symbol;Acc:HGNC:12412]
625	0.721941285	7.70E-123	Early_pPSM	SFN	stratifin [Source:HGNC Symbol;Acc:HGNC:10773]
626	0.51821336	1.28E-122	Early_pPSM	MIR4435-2HG	MIR4435-2 host gene [Source:HGNC Symbol;Acc:HGNC:35163]
627	1.271664749	3.67E-122	Early_pPSM	ACTC1	actin alpha cardiac muscle 1 [Source:HGNC Symbol;Acc:HGNC:143]
628	0.418413664	4.84E-121	Early_pPSM	C16orf74	chromosome 16 open reading frame 74 [Source:HGNC Symbol;Acc:HGNC:23362]
629	0.305487872	2.92E-120	Early_pPSM	CXCL14	C-X-C motif chemokine ligand 14 [Source:HGNC Symbol;Acc:HGNC:10640]
630	1.764779162	6.09E-120	Early_pPSM	LINC00458	long intergenic non-protein coding RNA 458 [Source:HGNC Symbol;Acc:HGNC:42807]
631	1.055812714	2.55E-119	Early_pPSM	KRT18	keratin 18 [Source:HGNC Symbol;Acc:HGNC:6430]
632	0.712246794	8.76E-119	Early_pPSM	RP11-1144P22.1	NA
633	1.105229279	5.56E-115	Early_pPSM	SLC3A2	solute carrier family 3 member 2 [Source:HGNC Symbol;Acc:HGNC:11026]
634	1.295182041	1.25E-113	Early_pPSM	LINC01356	long intergenic non-protein coding RNA 1356 [Source:HGNC Symbol;Acc:HGNC:50587]
635	0.799103796	5.88E-113	Early_pPSM	SLC7A5	solute carrier family 7 member 5 [Source:HGNC Symbol;Acc:HGNC:11063]
636	0.330892337	1.58E-112	Early_pPSM	SERTAD4-AS1	SERTAD4 antisense RNA 1 [Source:HGNC Symbol;Acc:HGNC:32019]
637	1.030973247	4.17E-111	Early_pPSM	TUBB2B	tubulin beta 2B class IIb [Source:HGNC Symbol;Acc:HGNC:30829]
638	0.883858088	4.30E-111	Early_pPSM	ASNS	asparagine synthetase (glutamine-hydrolyzing) [Source:HGNC Symbol;Acc:HGNC:753]
639	0.582592351	4.76E-111	Early_pPSM	PCDH10	protocadherin 10 [Source:HGNC Symbol;Acc:HGNC:13404]
640	0.590051441	7.29E-111	Early_pPSM	MEIS3	Meis homeobox 3 [Source:HGNC Symbol;Acc:HGNC:29537]
641	0.907035755	8.00E-111	Early_pPSM	KRT8	keratin 8 [Source:HGNC Symbol;Acc:HGNC:6446]
642	1.133370696	1.93E-109	Early_pPSM	KRT19	keratin 19 [Source:HGNC Symbol;Acc:HGNC:6436]
643	1.005337463	3.19E-108	Early_pPSM	PSAT1	phosphoserine aminotransferase 1 [Source:HGNC Symbol;Acc:HGNC:19129]
644	0.663308414	4.24E-107	Early_pPSM	CTD-2501M5.1	NA
645	0.41462847	1.62E-106	Early_pPSM	NPPB	natriuretic peptide B [Source:HGNC Symbol;Acc:HGNC:7940]
646	0.39353454	1.72E-106	Early_pPSM	MRGPRF	MAS related GPR family member F [Source:HGNC Symbol;Acc:HGNC:24828]
647	0.965287343	1.76E-105	Early_pPSM	TAGLN2	transgelin 2 [Source:HGNC Symbol;Acc:HGNC:11554]
648	0.320573619	2.36E-103	Early_pPSM	WNT6	Wnt family member 6 [Source:HGNC Symbol;Acc:HGNC:12785]
649	0.856535728	3.75E-103	Early_pPSM	CKB	creatine kinase B [Source:HGNC Symbol;Acc:HGNC:1991]
650	1.084578586	4.01E-103	Early_pPSM	MYL9	myosin light chain 9 [Source:HGNC Symbol;Acc:HGNC:15754]
651	0.337178412	2.08E-102	Early_pPSM	QPCT	glutaminyl-peptide cyclotransferase [Source:HGNC Symbol;Acc:HGNC:9753]
652	0.537066978	3.09E-102	Early_pPSM	NKX1-2	NK1 homeobox 2 [Source:HGNC Symbol;Acc:HGNC:31652]
653	0.395668088	5.25E-102	Early_pPSM	PLAC9	placenta associated 9 [Source:HGNC Symbol;Acc:HGNC:19255]
654	0.928095818	4.21E-101	Early_pPSM	EPHX1	epoxide hydrolase 1 [Source:HGNC Symbol;Acc:HGNC:3401]
655	0.273948894	6.90E-101	Early_pPSM	RP11-451G4.2	NA
656	0.410826104	5.22E-100	Early_pPSM	COL9A3	collagen type IX alpha 3 chain [Source:HGNC Symbol;Acc:HGNC:2219]
657	1.12623292	1.73E-99	Early_pPSM	CNTNAP2	contactin associated protein like 2 [Source:HGNC Symbol;Acc:HGNC:13830]
658	0.865683907	1.62E-98	Early_pPSM	CLDN6	claudin 6 [Source:HGNC Symbol;Acc:HGNC:2048]
659	0.981550426	2.07E-98	Early_pPSM	EPCAM	epithelial cell adhesion molecule [Source:HGNC Symbol;Acc:HGNC:11529]
660	0.594029567	2.35E-98	Early_pPSM	SCGB3A2	secretoglobin family 3A member 2 [Source:HGNC Symbol;Acc:HGNC:18391]
661	0.435012187	8.82E-97	Early_pPSM	VSNL1	visinin like 1 [Source:HGNC Symbol;Acc:HGNC:12722]
662	0.501811452	3.40E-95	Early_pPSM	TGFB1I1	transforming growth factor beta 1 induced transcript 1 [Source:HGNC Symbol;Acc:HGNC:11767]
663	0.60390951	6.16E-94	Early_pPSM	GAP43	growth associated protein 43 [Source:HGNC Symbol;Acc:HGNC:4140]
664	0.461987455	1.22E-92	Early_pPSM	MYL6	myosin light chain 6 [Source:HGNC Symbol;Acc:HGNC:7587]
665	0.285385969	1.03E-89	Early_pPSM	CBR3	carbonyl reductase 3 [Source:HGNC Symbol;Acc:HGNC:1549]
666	0.98050359	1.39E-89	Early_pPSM	SLC2A3	solute carrier family 2 member 3 [Source:HGNC Symbol;Acc:HGNC:11007]
667	0.269267272	7.86E-89	Early_pPSM	AP3B2	adaptor related protein complex 3 subunit beta 2 [Source:HGNC Symbol;Acc:HGNC:567]
668	0.537534705	9.00E-89	Early_pPSM	SLC7A11	solute carrier family 7 member 11 [Source:HGNC Symbol;Acc:HGNC:11059]
669	0.80306198	5.06E-88	Early_pPSM	TPM1	tropomyosin 1 [Source:HGNC Symbol;Acc:HGNC:12010]
670	0.292599671	2.78E-87	Early_pPSM	VGF	VGF nerve growth factor inducible [Source:HGNC Symbol;Acc:HGNC:12684]
671	0.760040639	1.36E-85	Early_pPSM	WARS	tryptophanyl-tRNA synthetase [Source:HGNC Symbol;Acc:HGNC:12729]
672	0.810623961	2.13E-85	Early_pPSM	RP11-568A7.4	NA
673	1.082698272	1.04E-84	Early_pPSM	TNFRSF12A	TNF receptor superfamily member 12A [Source:HGNC Symbol;Acc:HGNC:18152]
674	0.679176725	3.18E-83	Early_pPSM	SLC2A1	solute carrier family 2 member 1 [Source:HGNC Symbol;Acc:HGNC:11005]
675	0.392679972	3.31E-81	Early_pPSM	TUNAR	TCL1 upstream neural differentiation-associated RNA [Source:HGNC Symbol;Acc:HGNC:44088]
676	0.728193199	6.48E-81	Early_pPSM	CRABP2	cellular retinoic acid binding protein 2 [Source:HGNC Symbol;Acc:HGNC:2339]
677	0.74617123	1.46E-79	Early_pPSM	IFITM3	interferon induced transmembrane protein 3 [Source:HGNC Symbol;Acc:HGNC:5414]
678	0.675807731	1.57E-79	Early_pPSM	NQO1	NAD(P)H quinone dehydrogenase 1 [Source:HGNC Symbol;Acc:HGNC:2874]
679	0.592138839	1.77E-79	Early_pPSM	TES	testin LIM domain protein [Source:HGNC Symbol;Acc:HGNC:14620]
680	0.309878947	4.93E-79	Early_pPSM	ACTG2	actin gamma 2, smooth muscle [Source:HGNC Symbol;Acc:HGNC:145]
681	0.421396434	5.10E-78	Early_pPSM	ACTB	actin beta [Source:HGNC Symbol;Acc:HGNC:132]
682	0.379155199	6.91E-78	Early_pPSM	RP11-788H18.1	NA
683	0.768129318	2.21E-77	Early_pPSM	PDLIM1	PDZ and LIM domain 1 [Source:HGNC Symbol;Acc:HGNC:2067]
684	0.430868997	4.20E-77	Early_pPSM	RP11-267L5.1	NA
685	0.677154594	1.16E-76	Early_pPSM	WFDC2	WAP four-disulfide core domain 2 [Source:HGNC Symbol;Acc:HGNC:15939]
686	0.625497175	4.98E-76	Early_pPSM	TMSB4X	thymosin beta 4 X-linked [Source:HGNC Symbol;Acc:HGNC:11881]
687	0.826971677	5.07E-76	Early_pPSM	OCIAD2	OCIA domain containing 2 [Source:HGNC Symbol;Acc:HGNC:28685]
688	0.301220042	2.94E-74	Early_pPSM	SHISA9	shisa family member 9 [Source:HGNC Symbol;Acc:HGNC:37231]
689	0.538048891	5.78E-74	Early_pPSM	THY1	Thy-1 cell surface antigen [Source:HGNC Symbol;Acc:HGNC:11801]
690	0.787411219	5.80E-74	Early_pPSM	VCL	vinculin [Source:HGNC Symbol;Acc:HGNC:12665]
691	0.29068653	1.84E-73	Early_pPSM	SEL1L3	SEL1L family member 3 [Source:HGNC Symbol;Acc:HGNC:29108]
692	0.916648688	4.76E-73	Early_pPSM	FST	follistatin [Source:HGNC Symbol;Acc:HGNC:3971]
693	0.477587414	1.03E-72	Early_pPSM	CEBPB	CCAAT enhancer binding protein beta [Source:HGNC Symbol;Acc:HGNC:1834]
694	0.424308808	1.46E-72	Early_pPSM	DCLK1	doublecortin like kinase 1 [Source:HGNC Symbol;Acc:HGNC:2700]
695	0.371304499	3.57E-72	Early_pPSM	LGALS3	galectin 3 [Source:HGNC Symbol;Acc:HGNC:6563]
696	0.408157397	8.57E-72	Early_pPSM	CSRP1	cysteine and glycine rich protein 1 [Source:HGNC Symbol;Acc:HGNC:2469]
697	0.703935166	8.66E-72	Early_pPSM	UCHL1	ubiquitin C-terminal hydrolase L1 [Source:HGNC Symbol;Acc:HGNC:12513]
698	0.719761068	1.48E-71	Early_pPSM	TNNT1	troponin T1, slow skeletal type [Source:HGNC Symbol;Acc:HGNC:11948]
699	0.80087816	5.45E-71	Early_pPSM	EMP3	epithelial membrane protein 3 [Source:HGNC Symbol;Acc:HGNC:3335]
700	0.40872264	5.72E-71	Early_pPSM	FTL	ferritin light chain [Source:HGNC Symbol;Acc:HGNC:3999]
701	0.314127246	7.56E-70	Early_pPSM	AIFM2	apoptosis inducing factor mitochondria associated 2 [Source:HGNC Symbol;Acc:HGNC:21411]
702	0.650592433	4.20E-69	Early_pPSM	NEXN	nexilin F-actin binding protein [Source:HGNC Symbol;Acc:HGNC:29557]
703	0.776689588	5.09E-69	Early_pPSM	MTHFD2	methylenetetrahydrofolate dehydrogenase (NADP+ dependent) 2, methenyltetrahydrofolate cyclohydrolase [Source:HGNC Symbol;Acc:HGNC:7434]
704	0.318137205	5.39E-69	Early_pPSM	LINC00941	long intergenic non-protein coding RNA 941 [Source:HGNC Symbol;Acc:HGNC:48635]
705	0.734734403	7.42E-69	Early_pPSM	MT1H	metallothionein 1H [Source:HGNC Symbol;Acc:HGNC:7400]
706	0.626529475	1.10E-68	Early_pPSM	CD9	CD9 molecule [Source:HGNC Symbol;Acc:HGNC:1709]
707	0.580885269	1.24E-68	Early_pPSM	GABRB3	gamma-aminobutyric acid type A receptor beta3 subunit [Source:HGNC Symbol;Acc:HGNC:4083]
708	0.718567685	2.90E-68	Early_pPSM	MT1G	metallothionein 1G [Source:HGNC Symbol;Acc:HGNC:7399]
709	0.586559729	2.36E-67	Early_pPSM	TPM4	tropomyosin 4 [Source:HGNC Symbol;Acc:HGNC:12013]
710	0.793304936	5.88E-67	Early_pPSM	EZR	ezrin [Source:HGNC Symbol;Acc:HGNC:12691]
711	0.63625728	1.56E-66	Early_pPSM	SHMT2	serine hydroxymethyltransferase 2 [Source:HGNC Symbol;Acc:HGNC:10852]
712	0.33905485	2.42E-66	Early_pPSM	CDC42EP1	CDC42 effector protein 1 [Source:HGNC Symbol;Acc:HGNC:17014]
713	0.351494257	3.00E-66	Early_pPSM	FGF19	fibroblast growth factor 19 [Source:HGNC Symbol;Acc:HGNC:3675]
714	0.655277514	5.01E-66	Early_pPSM	PHGDH	phosphoglycerate dehydrogenase [Source:HGNC Symbol;Acc:HGNC:8923]
715	0.477185582	1.04E-64	Early_pPSM	F2RL1	F2R like trypsin receptor 1 [Source:HGNC Symbol;Acc:HGNC:3538]
716	0.65590735	6.39E-64	Early_pPSM	GSTO1	glutathione S-transferase omega 1 [Source:HGNC Symbol;Acc:HGNC:13312]
717	0.287813395	6.65E-64	Early_pPSM	CDCP1	CUB domain containing protein 1 [Source:HGNC Symbol;Acc:HGNC:24357]
718	0.430227986	8.46E-64	Early_pPSM	OLFM2	olfactomedin 2 [Source:HGNC Symbol;Acc:HGNC:17189]
719	0.389489519	9.03E-64	Early_pPSM	ALDOA	aldolase, fructose-bisphosphate A [Source:HGNC Symbol;Acc:HGNC:414]
720	0.460616635	1.86E-63	Early_pPSM	ENO1	enolase 1 [Source:HGNC Symbol;Acc:HGNC:3350]
721	0.791361427	2.09E-62	Early_pPSM	CLU	clusterin [Source:HGNC Symbol;Acc:HGNC:2095]
722	0.358549447	2.22E-62	Early_pPSM	FADS3	fatty acid desaturase 3 [Source:HGNC Symbol;Acc:HGNC:3576]
723	0.418208458	3.66E-62	Early_pPSM	RP11-20D14.6	NA
724	0.510958392	1.16E-61	Early_pPSM	NPY	neuropeptide Y [Source:HGNC Symbol;Acc:HGNC:7955]
725	0.668917468	1.15E-60	Early_pPSM	EIF4EBP1	eukaryotic translation initiation factor 4E binding protein 1 [Source:HGNC Symbol;Acc:HGNC:3288]
726	0.277391361	5.28E-60	Early_pPSM	ADCY2	adenylate cyclase 2 [Source:HGNC Symbol;Acc:HGNC:233]
727	0.350371758	1.34E-59	Early_pPSM	PPIC	peptidylprolyl isomerase C [Source:HGNC Symbol;Acc:HGNC:9256]
728	0.37996832	1.41E-59	Early_pPSM	GLIPR1L1	GLIPR1 like 1 [Source:HGNC Symbol;Acc:HGNC:28392]
729	0.600760644	9.00E-59	Early_pPSM	DMKN	dermokine [Source:HGNC Symbol;Acc:HGNC:25063]
730	0.465711606	9.93E-59	Early_pPSM	CD81	CD81 molecule [Source:HGNC Symbol;Acc:HGNC:1701]
731	0.519858852	1.56E-58	Early_pPSM	CLIC1	chloride intracellular channel 1 [Source:HGNC Symbol;Acc:HGNC:2062]
732	0.647629353	1.01E-57	Early_pPSM	RP11-148B6.1	NA
733	0.623977434	1.31E-57	Early_pPSM	ODC1	ornithine decarboxylase 1 [Source:HGNC Symbol;Acc:HGNC:8109]
734	0.65226459	2.40E-57	Early_pPSM	ITM2B	integral membrane protein 2B [Source:HGNC Symbol;Acc:HGNC:6174]
735	0.489085354	1.03E-56	Early_pPSM	TXNRD2	thioredoxin reductase 2 [Source:HGNC Symbol;Acc:HGNC:18155]
736	0.379559929	1.61E-56	Early_pPSM	CDH1	cadherin 1 [Source:HGNC Symbol;Acc:HGNC:1748]
737	0.666654974	2.47E-56	Early_pPSM	PERP	p53 apoptosis effector related to PMP22 [Source:HGNC Symbol;Acc:HGNC:17637]
738	0.338815159	3.21E-56	Early_pPSM	PLPP2	phospholipid phosphatase 2 [Source:HGNC Symbol;Acc:HGNC:9230]
739	0.357850723	4.89E-55	Early_pPSM	TNFRSF9	TNF receptor superfamily member 9 [Source:HGNC Symbol;Acc:HGNC:11924]
740	0.410125906	5.74E-55	Early_pPSM	RP11-149I23.3	NA
741	0.489212409	8.92E-54	Early_pPSM	SOCS2	suppressor of cytokine signaling 2 [Source:HGNC Symbol;Acc:HGNC:19382]
742	0.620537738	1.64E-53	Early_pPSM	SQSTM1	sequestosome 1 [Source:HGNC Symbol;Acc:HGNC:11280]
743	0.626208507	1.81E-53	Early_pPSM	FOXH1	forkhead box H1 [Source:HGNC Symbol;Acc:HGNC:3814]
744	0.628550355	1.18E-52	Early_pPSM	WLS	Wnt ligand secretion mediator [Source:HGNC Symbol;Acc:HGNC:30238]
745	0.627870799	2.22E-52	Early_pPSM	ANXA2	annexin A2 [Source:HGNC Symbol;Acc:HGNC:537]
746	0.4461698	8.35E-52	Early_pPSM	DSEL	dermatan sulfate epimerase like [Source:HGNC Symbol;Acc:HGNC:18144]
747	0.560340858	1.20E-51	Early_pPSM	CCND1	cyclin D1 [Source:HGNC Symbol;Acc:HGNC:1582]
748	0.440202331	1.71E-51	Early_pPSM	GMPR	guanosine monophosphate reductase [Source:HGNC Symbol;Acc:HGNC:4376]
749	0.534093791	2.07E-51	Early_pPSM	SPINT2	serine peptidase inhibitor, Kunitz type 2 [Source:HGNC Symbol;Acc:HGNC:11247]
750	0.505832917	3.62E-51	Early_pPSM	ABRACL	ABRA C-terminal like [Source:HGNC Symbol;Acc:HGNC:21230]
751	0.58670022	6.04E-51	Early_pPSM	GARS	glycyl-tRNA synthetase [Source:HGNC Symbol;Acc:HGNC:4162]
752	0.30725323	1.37E-50	Early_pPSM	STC2	stanniocalcin 2 [Source:HGNC Symbol;Acc:HGNC:11374]
753	0.5304511	3.18E-50	Early_pPSM	SMS	spermine synthase [Source:HGNC Symbol;Acc:HGNC:11123]
754	0.381540318	1.57E-49	Early_pPSM	AHNAK	AHNAK nucleoprotein [Source:HGNC Symbol;Acc:HGNC:347]
755	0.49533162	2.02E-49	Early_pPSM	YBX3	Y-box binding protein 3 [Source:HGNC Symbol;Acc:HGNC:2428]
756	0.341602029	5.97E-49	Early_pPSM	ATF3	activating transcription factor 3 [Source:HGNC Symbol;Acc:HGNC:785]
757	0.530593603	6.33E-49	Early_pPSM	POU5F1	POU class 5 homeobox 1 [Source:HGNC Symbol;Acc:HGNC:9221]
758	0.490823405	1.03E-48	Early_pPSM	APOE	apolipoprotein E [Source:HGNC Symbol;Acc:HGNC:613]
759	0.548332879	4.24E-48	Early_pPSM	VAMP8	vesicle associated membrane protein 8 [Source:HGNC Symbol;Acc:HGNC:12647]
760	0.412308084	7.12E-48	Early_pPSM	MT1E	metallothionein 1E [Source:HGNC Symbol;Acc:HGNC:7397]
761	0.487687011	1.03E-47	Early_pPSM	ALPL	alkaline phosphatase, biomineralization associated [Source:HGNC Symbol;Acc:HGNC:438]
762	0.360177164	2.72E-47	Early_pPSM	SLIT2	slit guidance ligand 2 [Source:HGNC Symbol;Acc:HGNC:11086]
763	0.384909145	3.13E-47	Early_pPSM	DLGAP1-AS2	DLGAP1 antisense RNA 2 [Source:HGNC Symbol;Acc:HGNC:28146]
764	0.497143599	5.76E-47	Early_pPSM	KCNG1	potassium voltage-gated channel modifier subfamily G member 1 [Source:HGNC Symbol;Acc:HGNC:6248]
765	0.503158432	6.04E-47	Early_pPSM	HTATIP2	HIV-1 Tat interactive protein 2 [Source:HGNC Symbol;Acc:HGNC:16637]
766	0.322513523	1.17E-46	Early_pPSM	ACTG1	actin gamma 1 [Source:HGNC Symbol;Acc:HGNC:144]
767	0.439915676	1.89E-46	Early_pPSM	PSPH	phosphoserine phosphatase [Source:HGNC Symbol;Acc:HGNC:9577]
768	0.322708081	4.21E-46	Early_pPSM	EIF1	eukaryotic translation initiation factor 1 [Source:HGNC Symbol;Acc:HGNC:3249]
769	0.456694403	6.86E-46	Early_pPSM	BAG2	BCL2 associated athanogene 2 [Source:HGNC Symbol;Acc:HGNC:938]
770	0.489420784	1.82E-45	Early_pPSM	NARS	asparaginyl-tRNA synthetase [Source:HGNC Symbol;Acc:HGNC:7643]
771	0.383357065	3.75E-45	Early_pPSM	PGAM1	phosphoglycerate mutase 1 [Source:HGNC Symbol;Acc:HGNC:8888]
772	0.255530067	7.88E-45	Early_pPSM	NANOS1	nanos C2HC-type zinc finger 1 [Source:HGNC Symbol;Acc:HGNC:23044]
773	0.322040486	1.45E-44	Early_pPSM	JDP2	Jun dimerization protein 2 [Source:HGNC Symbol;Acc:HGNC:17546]
774	0.317943745	1.74E-44	Early_pPSM	CLDN7	claudin 7 [Source:HGNC Symbol;Acc:HGNC:2049]
775	0.359826075	1.05E-43	Early_pPSM	IFITM1	interferon induced transmembrane protein 1 [Source:HGNC Symbol;Acc:HGNC:5412]
776	0.266186971	2.65E-43	Early_pPSM	RAB38	RAB38, member RAS oncogene family [Source:HGNC Symbol;Acc:HGNC:9776]
777	0.585013746	3.30E-43	Early_pPSM	T	NA
778	0.356864148	9.86E-43	Early_pPSM	MAL2	mal, T cell differentiation protein 2 (gene/pseudogene) [Source:HGNC Symbol;Acc:HGNC:13634]
779	0.459285848	1.60E-42	Early_pPSM	PCK2	phosphoenolpyruvate carboxykinase 2, mitochondrial [Source:HGNC Symbol;Acc:HGNC:8725]
780	0.271070758	1.75E-42	Early_pPSM	WNT3A	Wnt family member 3A [Source:HGNC Symbol;Acc:HGNC:15983]
781	0.282371714	2.45E-42	Early_pPSM	OCLN	occludin [Source:HGNC Symbol;Acc:HGNC:8104]
782	0.487717621	2.88E-42	Early_pPSM	PDLIM2	PDZ and LIM domain 2 [Source:HGNC Symbol;Acc:HGNC:13992]
783	0.399094231	4.41E-42	Early_pPSM	FBLIM1	filamin binding LIM protein 1 [Source:HGNC Symbol;Acc:HGNC:24686]
784	0.306941179	7.00E-42	Early_pPSM	OAZ1	ornithine decarboxylase antizyme 1 [Source:HGNC Symbol;Acc:HGNC:8095]
785	0.52872842	7.51E-42	Early_pPSM	LIN28A	lin-28 homolog A [Source:HGNC Symbol;Acc:HGNC:15986]
786	0.574805608	1.09E-41	Early_pPSM	NQO2	N-ribosyldihydronicotinamide:quinone reductase 2 [Source:HGNC Symbol;Acc:HGNC:7856]
787	0.480599229	1.11E-41	Early_pPSM	SLC25A4	solute carrier family 25 member 4 [Source:HGNC Symbol;Acc:HGNC:10990]
788	0.500174594	1.54E-41	Early_pPSM	STXBP6	syntaxin binding protein 6 [Source:HGNC Symbol;Acc:HGNC:19666]
789	0.588095946	2.13E-41	Early_pPSM	CALD1	caldesmon 1 [Source:HGNC Symbol;Acc:HGNC:1441]
790	0.409247536	2.82E-41	Early_pPSM	FHL2	four and a half LIM domains 2 [Source:HGNC Symbol;Acc:HGNC:3703]
791	0.502849689	3.57E-41	Early_pPSM	ACTR3	actin related protein 3 [Source:HGNC Symbol;Acc:HGNC:170]
792	0.418627009	1.69E-40	Early_pPSM	LDB2	LIM domain binding 2 [Source:HGNC Symbol;Acc:HGNC:6533]
793	0.361465471	2.29E-40	Early_pPSM	VRTN	vertebrae development associated [Source:HGNC Symbol;Acc:HGNC:20223]
794	0.46113953	3.65E-40	Early_pPSM	ZYX	zyxin [Source:HGNC Symbol;Acc:HGNC:13200]
795	0.468087646	3.66E-40	Early_pPSM	ARG2	arginase 2 [Source:HGNC Symbol;Acc:HGNC:664]
796	0.35760972	2.47E-39	Early_pPSM	EIF2S2	eukaryotic translation initiation factor 2 subunit beta [Source:HGNC Symbol;Acc:HGNC:3266]
797	0.384104227	8.55E-39	Early_pPSM	LINC00678	long intergenic non-protein coding RNA 678 [Source:HGNC Symbol;Acc:HGNC:44413]
798	0.435585441	2.29E-38	Early_pPSM	MPG	N-methylpurine DNA glycosylase [Source:HGNC Symbol;Acc:HGNC:7211]
799	0.273143013	9.09E-38	Early_pPSM	WNT8A	Wnt family member 8A [Source:HGNC Symbol;Acc:HGNC:12788]
800	0.49247292	2.21E-37	Early_pPSM	ATF4	activating transcription factor 4 [Source:HGNC Symbol;Acc:HGNC:786]
801	0.45003741	8.45E-37	Early_pPSM	PDLIM7	PDZ and LIM domain 7 [Source:HGNC Symbol;Acc:HGNC:22958]
802	0.288977315	8.64E-37	Early_pPSM	AP000688.29	NA
803	0.41945713	1.19E-36	Early_pPSM	RAB13	RAB13, member RAS oncogene family [Source:HGNC Symbol;Acc:HGNC:9762]
804	0.394607863	1.30E-36	Early_pPSM	CAPG	capping actin protein, gelsolin like [Source:HGNC Symbol;Acc:HGNC:1474]
805	0.454545703	2.36E-36	Early_pPSM	WDR1	WD repeat domain 1 [Source:HGNC Symbol;Acc:HGNC:12754]
806	0.283077489	3.36E-36	Early_pPSM	ME1	malic enzyme 1 [Source:HGNC Symbol;Acc:HGNC:6983]
807	0.352207271	4.48E-36	Early_pPSM	GCLM	glutamate-cysteine ligase modifier subunit [Source:HGNC Symbol;Acc:HGNC:4312]
808	0.615813727	4.96E-36	Early_pPSM	MT1X	metallothionein 1X [Source:HGNC Symbol;Acc:HGNC:7405]
809	0.314982878	6.40E-36	Early_pPSM	PACSIN3	protein kinase C and casein kinase substrate in neurons 3 [Source:HGNC Symbol;Acc:HGNC:8572]
810	0.258623061	7.05E-36	Early_pPSM	H3F3B	H3 histone family member 3B [Source:HGNC Symbol;Acc:HGNC:4765]
811	0.301947665	1.42E-35	Early_pPSM	TEAD4	TEA domain transcription factor 4 [Source:HGNC Symbol;Acc:HGNC:11717]
812	0.496695251	1.42E-35	Early_pPSM	UGP2	UDP-glucose pyrophosphorylase 2 [Source:HGNC Symbol;Acc:HGNC:12527]
813	0.34280963	1.51E-35	Early_pPSM	MDFIC	MyoD family inhibitor domain containing [Source:HGNC Symbol;Acc:HGNC:28870]
814	0.293968235	1.74E-35	Early_pPSM	CTD-2306M5.1	NA
815	0.294973504	1.94E-35	Early_pPSM	SPINT1	serine peptidase inhibitor, Kunitz type 1 [Source:HGNC Symbol;Acc:HGNC:11246]
816	0.402202882	2.64E-35	Early_pPSM	RTN4	reticulon 4 [Source:HGNC Symbol;Acc:HGNC:14085]
817	0.352491748	3.97E-35	Early_pPSM	S100A11	S100 calcium binding protein A11 [Source:HGNC Symbol;Acc:HGNC:10488]
818	0.316225252	8.44E-35	Early_pPSM	AC145124.2	NA
819	0.452248398	1.86E-34	Early_pPSM	PYCARD	PYD and CARD domain containing [Source:HGNC Symbol;Acc:HGNC:16608]
820	0.295846544	3.55E-34	Early_pPSM	IRX2	iroquois homeobox 2 [Source:HGNC Symbol;Acc:HGNC:14359]
821	0.444174385	5.87E-34	Early_pPSM	SARS	seryl-tRNA synthetase [Source:HGNC Symbol;Acc:HGNC:10537]
822	0.53622309	6.58E-34	Early_pPSM	SPATS2L	spermatogenesis associated serine rich 2 like [Source:HGNC Symbol;Acc:HGNC:24574]
823	0.285400678	8.72E-34	Early_pPSM	TNNI3	troponin I3, cardiac type [Source:HGNC Symbol;Acc:HGNC:11947]
824	0.365857108	1.88E-33	Early_pPSM	RNF43	ring finger protein 43 [Source:HGNC Symbol;Acc:HGNC:18505]
825	0.453953606	7.97E-33	Early_pPSM	TUBA1C	tubulin alpha 1c [Source:HGNC Symbol;Acc:HGNC:20768]
826	0.456047897	8.47E-33	Early_pPSM	HAX1	HCLS1 associated protein X-1 [Source:HGNC Symbol;Acc:HGNC:16915]
827	0.396308594	1.31E-32	Early_pPSM	IFRD1	interferon related developmental regulator 1 [Source:HGNC Symbol;Acc:HGNC:5456]
828	0.52305153	2.38E-32	Early_pPSM	ATF5	activating transcription factor 5 [Source:HGNC Symbol;Acc:HGNC:790]
829	0.281647933	4.18E-32	Early_pPSM	RP11-35J1.2	NA
830	0.312810924	5.96E-32	Early_pPSM	PHLDA3	pleckstrin homology like domain family A member 3 [Source:HGNC Symbol;Acc:HGNC:8934]
831	0.31169823	7.45E-32	Early_pPSM	VDAC2	voltage dependent anion channel 2 [Source:HGNC Symbol;Acc:HGNC:12672]
832	0.331777343	9.47E-32	Early_pPSM	ANXA5	annexin A5 [Source:HGNC Symbol;Acc:HGNC:543]
833	0.316368929	1.13E-31	Early_pPSM	TAC1	tachykinin precursor 1 [Source:HGNC Symbol;Acc:HGNC:11517]
834	0.371122158	1.19E-31	Early_pPSM	DDIT3	DNA damage inducible transcript 3 [Source:HGNC Symbol;Acc:HGNC:2726]
835	0.457934182	1.73E-31	Early_pPSM	CDX2	caudal type homeobox 2 [Source:HGNC Symbol;Acc:HGNC:1806]
836	0.252965613	2.57E-31	Early_pPSM	ENO2	enolase 2 [Source:HGNC Symbol;Acc:HGNC:3353]
837	0.267020666	2.69E-31	Early_pPSM	SLC6A6	solute carrier family 6 member 6 [Source:HGNC Symbol;Acc:HGNC:11052]
838	0.33027952	3.33E-31	Early_pPSM	CAMK2D	calcium/calmodulin dependent protein kinase II delta [Source:HGNC Symbol;Acc:HGNC:1462]
839	0.70968067	5.38E-31	Early_pPSM	RSPO3	R-spondin 3 [Source:HGNC Symbol;Acc:HGNC:20866]
840	0.377018631	6.37E-31	Early_pPSM	DTWD2	DTW domain containing 2 [Source:HGNC Symbol;Acc:HGNC:19334]
841	0.410396169	6.98E-31	Early_pPSM	CARS	cysteinyl-tRNA synthetase [Source:HGNC Symbol;Acc:HGNC:1493]
842	0.39017093	8.08E-31	Early_pPSM	GNAI1	G protein subunit alpha i1 [Source:HGNC Symbol;Acc:HGNC:4384]
843	0.309348967	1.02E-30	Early_pPSM	ANP32B	acidic nuclear phosphoprotein 32 family member B [Source:HGNC Symbol;Acc:HGNC:16677]
844	0.27106948	1.06E-30	Early_pPSM	HSPD1	heat shock protein family D (Hsp60) member 1 [Source:HGNC Symbol;Acc:HGNC:5261]
845	0.254652876	1.31E-30	Early_pPSM	MT-ND2	mitochondrially encoded NADH:ubiquinone oxidoreductase core subunit 2 [Source:HGNC Symbol;Acc:HGNC:7456]
846	0.42363955	1.65E-30	Early_pPSM	REXO2	RNA exonuclease 2 [Source:HGNC Symbol;Acc:HGNC:17851]
847	0.44522753	1.70E-30	Early_pPSM	PAWR	pro-apoptotic WT1 regulator [Source:HGNC Symbol;Acc:HGNC:8614]
848	0.404722672	2.81E-30	Early_pPSM	PGM1	phosphoglucomutase 1 [Source:HGNC Symbol;Acc:HGNC:8905]
849	0.360773558	9.75E-30	Early_pPSM	CAPN2	calpain 2 [Source:HGNC Symbol;Acc:HGNC:1479]
850	0.307882021	1.95E-29	Early_pPSM	ATAD3B	ATPase family AAA domain containing 3B [Source:HGNC Symbol;Acc:HGNC:24007]
851	0.290705924	2.09E-29	Early_pPSM	ANXA11	annexin A11 [Source:HGNC Symbol;Acc:HGNC:535]
852	0.281450499	4.40E-29	Early_pPSM	IGFBP6	insulin like growth factor binding protein 6 [Source:HGNC Symbol;Acc:HGNC:5475]
853	0.379431281	5.20E-29	Early_pPSM	VASP	vasodilator stimulated phosphoprotein [Source:HGNC Symbol;Acc:HGNC:12652]
854	0.304325906	6.44E-29	Early_pPSM	AC093673.5	NA
855	0.378916856	7.96E-29	Early_pPSM	CACHD1	cache domain containing 1 [Source:HGNC Symbol;Acc:HGNC:29314]
856	0.270217068	1.39E-28	Early_pPSM	GSR	glutathione-disulfide reductase [Source:HGNC Symbol;Acc:HGNC:4623]
857	0.415651385	1.54E-28	Early_pPSM	ACTN1	actinin alpha 1 [Source:HGNC Symbol;Acc:HGNC:163]
858	0.274082876	1.76E-28	Early_pPSM	LASP1	LIM and SH3 protein 1 [Source:HGNC Symbol;Acc:HGNC:6513]
859	0.348111671	1.99E-28	Early_pPSM	TRIB2	tribbles pseudokinase 2 [Source:HGNC Symbol;Acc:HGNC:30809]
860	0.361819794	2.62E-28	Early_pPSM	MYL12A	myosin light chain 12A [Source:HGNC Symbol;Acc:HGNC:16701]
861	0.34663477	3.61E-28	Early_pPSM	FLNC	filamin C [Source:HGNC Symbol;Acc:HGNC:3756]
862	0.353775477	7.31E-28	Early_pPSM	PEA15	proliferation and apoptosis adaptor protein 15 [Source:HGNC Symbol;Acc:HGNC:8822]
863	0.265239735	1.02E-27	Early_pPSM	ID2	inhibitor of DNA binding 2 [Source:HGNC Symbol;Acc:HGNC:5361]
864	0.266031241	1.23E-27	Early_pPSM	KRTCAP3	keratinocyte associated protein 3 [Source:HGNC Symbol;Acc:HGNC:28943]
865	0.359010892	1.68E-27	Early_pPSM	KIF5C	kinesin family member 5C [Source:HGNC Symbol;Acc:HGNC:6325]
866	0.341377691	2.96E-27	Early_pPSM	ENPP1	ectonucleotide pyrophosphatase/phosphodiesterase 1 [Source:HGNC Symbol;Acc:HGNC:3356]
867	0.272150367	3.81E-27	Early_pPSM	INF2	inverted formin, FH2 and WH2 domain containing [Source:HGNC Symbol;Acc:HGNC:23791]
868	0.362983836	4.07E-27	Early_pPSM	TRIP6	thyroid hormone receptor interactor 6 [Source:HGNC Symbol;Acc:HGNC:12311]
869	0.818304999	5.07E-27	Early_pPSM	DKK1	dickkopf WNT signaling pathway inhibitor 1 [Source:HGNC Symbol;Acc:HGNC:2891]
870	0.265544598	6.62E-27	Early_pPSM	CERS4	ceramide synthase 4 [Source:HGNC Symbol;Acc:HGNC:23747]
871	0.27860251	6.64E-27	Early_pPSM	PRDX6	peroxiredoxin 6 [Source:HGNC Symbol;Acc:HGNC:16753]
872	0.385977337	8.86E-27	Early_pPSM	ETV4	ETS variant 4 [Source:HGNC Symbol;Acc:HGNC:3493]
873	0.409428784	9.07E-27	Early_pPSM	TXNRD1	thioredoxin reductase 1 [Source:HGNC Symbol;Acc:HGNC:12437]
874	0.290950901	1.38E-26	Early_pPSM	GPT2	glutamic--pyruvic transaminase 2 [Source:HGNC Symbol;Acc:HGNC:18062]
875	0.270273762	3.89E-26	Early_pPSM	SLC39A14	solute carrier family 39 member 14 [Source:HGNC Symbol;Acc:HGNC:20858]
876	0.310450778	4.95E-26	Early_pPSM	DDIT4	DNA damage inducible transcript 4 [Source:HGNC Symbol;Acc:HGNC:24944]
877	0.403864612	7.75E-26	Early_pPSM	TUBB6	tubulin beta 6 class V [Source:HGNC Symbol;Acc:HGNC:20776]
878	0.37416908	8.04E-26	Early_pPSM	OAT	ornithine aminotransferase [Source:HGNC Symbol;Acc:HGNC:8091]
879	0.271594337	1.04E-25	Early_pPSM	APBB2	amyloid beta precursor protein binding family B member 2 [Source:HGNC Symbol;Acc:HGNC:582]
880	0.30228518	1.45E-25	Early_pPSM	MARS	methionyl-tRNA synthetase [Source:HGNC Symbol;Acc:HGNC:6898]
881	0.302999962	2.45E-25	Early_pPSM	LMNA	lamin A/C [Source:HGNC Symbol;Acc:HGNC:6636]
882	0.351584563	6.03E-25	Early_pPSM	HSPA9	heat shock protein family A (Hsp70) member 9 [Source:HGNC Symbol;Acc:HGNC:5244]
883	0.386633777	9.51E-25	Early_pPSM	PTBP3	polypyrimidine tract binding protein 3 [Source:HGNC Symbol;Acc:HGNC:10253]
884	0.345612713	1.05E-24	Early_pPSM	SERPINH1	serpin family H member 1 [Source:HGNC Symbol;Acc:HGNC:1546]
885	0.362853218	2.44E-24	Early_pPSM	CNN2	calponin 2 [Source:HGNC Symbol;Acc:HGNC:2156]
886	0.448158098	2.56E-24	Early_pPSM	CBR1	carbonyl reductase 1 [Source:HGNC Symbol;Acc:HGNC:1548]
887	0.357094418	2.71E-24	Early_pPSM	NUDT15	nudix hydrolase 15 [Source:HGNC Symbol;Acc:HGNC:23063]
888	0.317073724	3.96E-24	Early_pPSM	GCHFR	GTP cyclohydrolase I feedback regulator [Source:HGNC Symbol;Acc:HGNC:4194]
889	0.352273309	8.35E-24	Early_pPSM	PYCR1	pyrroline-5-carboxylate reductase 1 [Source:HGNC Symbol;Acc:HGNC:9721]
890	0.281607836	8.43E-24	Early_pPSM	SLC7A1	solute carrier family 7 member 1 [Source:HGNC Symbol;Acc:HGNC:11057]
891	0.378783933	9.66E-24	Early_pPSM	CDX1	caudal type homeobox 1 [Source:HGNC Symbol;Acc:HGNC:1805]
892	0.399669243	2.00E-23	Early_pPSM	GAD1	glutamate decarboxylase 1 [Source:HGNC Symbol;Acc:HGNC:4092]
893	0.324471795	2.04E-23	Early_pPSM	C20orf24	NA
894	0.253674831	4.77E-23	Early_pPSM	C1GALT1	core 1 synthase, glycoprotein-N-acetylgalactosamine 3-beta-galactosyltransferase 1 [Source:HGNC Symbol;Acc:HGNC:24337]
895	0.38655039	5.94E-23	Early_pPSM	MAP1B	microtubule associated protein 1B [Source:HGNC Symbol;Acc:HGNC:6836]
896	0.355667005	9.65E-23	Early_pPSM	PTPRZ1	protein tyrosine phosphatase receptor type Z1 [Source:HGNC Symbol;Acc:HGNC:9685]
897	0.319384442	1.02E-22	Early_pPSM	MYL12B	myosin light chain 12B [Source:HGNC Symbol;Acc:HGNC:29827]
898	0.277167979	1.21E-22	Early_pPSM	SPON1	spondin 1 [Source:HGNC Symbol;Acc:HGNC:11252]
899	0.354831591	1.41E-22	Early_pPSM	FLNA	filamin A [Source:HGNC Symbol;Acc:HGNC:3754]
900	0.350701187	1.90E-22	Early_pPSM	TARS	threonyl-tRNA synthetase [Source:HGNC Symbol;Acc:HGNC:11572]
901	0.345147314	1.93E-22	Early_pPSM	PPP1R14C	protein phosphatase 1 regulatory inhibitor subunit 14C [Source:HGNC Symbol;Acc:HGNC:14952]
902	0.364897577	2.13E-22	Early_pPSM	OLFML3	olfactomedin like 3 [Source:HGNC Symbol;Acc:HGNC:24956]
903	0.332176433	2.81E-22	Early_pPSM	CNIH4	cornichon family AMPA receptor auxiliary protein 4 [Source:HGNC Symbol;Acc:HGNC:25013]
904	0.27026791	3.63E-22	Early_pPSM	FSCN1	fascin actin-bundling protein 1 [Source:HGNC Symbol;Acc:HGNC:11148]
905	0.346841765	3.72E-22	Early_pPSM	RCN1	reticulocalbin 1 [Source:HGNC Symbol;Acc:HGNC:9934]
906	0.266572087	5.27E-22	Early_pPSM	MGST3	microsomal glutathione S-transferase 3 [Source:HGNC Symbol;Acc:HGNC:7064]
907	0.30640661	8.95E-22	Early_pPSM	TSEN15	tRNA splicing endonuclease subunit 15 [Source:HGNC Symbol;Acc:HGNC:16791]
908	0.316082699	8.95E-22	Early_pPSM	ARPC5	actin related protein 2/3 complex subunit 5 [Source:HGNC Symbol;Acc:HGNC:708]
909	0.399008377	1.04E-21	Early_pPSM	SP5	Sp5 transcription factor [Source:HGNC Symbol;Acc:HGNC:14529]
910	0.258270356	1.35E-21	Early_pPSM	BMP7	bone morphogenetic protein 7 [Source:HGNC Symbol;Acc:HGNC:1074]
911	0.256177635	1.87E-21	Early_pPSM	ENC1	ectodermal-neural cortex 1 [Source:HGNC Symbol;Acc:HGNC:3345]
912	0.25675312	2.10E-21	Early_pPSM	ZBTB38	zinc finger and BTB domain containing 38 [Source:HGNC Symbol;Acc:HGNC:26636]
913	0.277933362	4.38E-21	Early_pPSM	CHPT1	choline phosphotransferase 1 [Source:HGNC Symbol;Acc:HGNC:17852]
914	0.418358924	4.61E-21	Early_pPSM	MYH9	myosin heavy chain 9 [Source:HGNC Symbol;Acc:HGNC:7579]
915	0.355442404	9.14E-21	Early_pPSM	ZNF649	zinc finger protein 649 [Source:HGNC Symbol;Acc:HGNC:25741]
916	0.364846208	1.08E-20	Early_pPSM	DESI2	desumoylating isopeptidase 2 [Source:HGNC Symbol;Acc:HGNC:24264]
917	0.347702595	1.39E-20	Early_pPSM	CCNB1IP1	cyclin B1 interacting protein 1 [Source:HGNC Symbol;Acc:HGNC:19437]
918	0.306694436	2.18E-20	Early_pPSM	FHL3	four and a half LIM domains 3 [Source:HGNC Symbol;Acc:HGNC:3704]
919	0.500547537	2.65E-20	Early_pPSM	ARL4A	ADP ribosylation factor like GTPase 4A [Source:HGNC Symbol;Acc:HGNC:695]
920	0.325908911	2.90E-20	Early_pPSM	CSK	C-terminal Src kinase [Source:HGNC Symbol;Acc:HGNC:2444]
921	0.270578655	4.27E-20	Early_pPSM	NETO2	neuropilin and tolloid like 2 [Source:HGNC Symbol;Acc:HGNC:14644]
922	0.309341976	8.21E-20	Early_pPSM	ACOT7	acyl-CoA thioesterase 7 [Source:HGNC Symbol;Acc:HGNC:24157]
923	0.304591633	9.73E-20	Early_pPSM	SKA1	spindle and kinetochore associated complex subunit 1 [Source:HGNC Symbol;Acc:HGNC:28109]
924	0.280177045	1.31E-19	Early_pPSM	CCDC84	coiled-coil domain containing 84 [Source:HGNC Symbol;Acc:HGNC:30460]
925	0.305095125	1.91E-19	Early_pPSM	CITED2	Cbp/p300 interacting transactivator with Glu/Asp rich carboxy-terminal domain 2 [Source:HGNC Symbol;Acc:HGNC:1987]
926	0.294058764	2.16E-19	Early_pPSM	FAM169A	family with sequence similarity 169 member A [Source:HGNC Symbol;Acc:HGNC:29138]
927	0.272795818	2.45E-19	Early_pPSM	PTPN13	protein tyrosine phosphatase non-receptor type 13 [Source:HGNC Symbol;Acc:HGNC:9646]
928	0.25512969	3.18E-19	Early_pPSM	TMEM158	transmembrane protein 158 (gene/pseudogene) [Source:HGNC Symbol;Acc:HGNC:30293]
929	0.250297852	3.20E-19	Early_pPSM	HES4	hes family bHLH transcription factor 4 [Source:HGNC Symbol;Acc:HGNC:24149]
930	0.357279784	5.24E-19	Early_pPSM	AP1S2	adaptor related protein complex 1 subunit sigma 2 [Source:HGNC Symbol;Acc:HGNC:560]
931	0.285789475	5.59E-19	Early_pPSM	POLR3G	RNA polymerase III subunit G [Source:HGNC Symbol;Acc:HGNC:30075]
932	0.319529715	6.22E-19	Early_pPSM	NANS	N-acetylneuraminate synthase [Source:HGNC Symbol;Acc:HGNC:19237]
933	0.268544081	9.53E-19	Early_pPSM	CTSV	cathepsin V [Source:HGNC Symbol;Acc:HGNC:2538]
934	0.331172861	1.05E-18	Early_pPSM	BCAT1	branched chain amino acid transaminase 1 [Source:HGNC Symbol;Acc:HGNC:976]
935	0.416342973	1.14E-18	Early_pPSM	C12orf75	chromosome 12 open reading frame 75 [Source:HGNC Symbol;Acc:HGNC:35164]
936	0.490926393	1.30E-18	Early_pPSM	ID3	inhibitor of DNA binding 3, HLH protein [Source:HGNC Symbol;Acc:HGNC:5362]
937	0.264399377	1.41E-18	Early_pPSM	YWHAH	tyrosine 3-monooxygenase/tryptophan 5-monooxygenase activation protein eta [Source:HGNC Symbol;Acc:HGNC:12853]
938	0.271016009	1.70E-18	Early_pPSM	SHTN1	shootin 1 [Source:HGNC Symbol;Acc:HGNC:29319]
939	0.343892521	2.05E-18	Early_pPSM	CEBPG	CCAAT enhancer binding protein gamma [Source:HGNC Symbol;Acc:HGNC:1837]
940	0.289594103	2.86E-18	Early_pPSM	B3GNT2	UDP-GlcNAc:betaGal beta-1,3-N-acetylglucosaminyltransferase 2 [Source:HGNC Symbol;Acc:HGNC:15629]
941	0.339212807	3.68E-18	Early_pPSM	SEMA6A	semaphorin 6A [Source:HGNC Symbol;Acc:HGNC:10738]
942	0.286451112	5.54E-18	Early_pPSM	LDHA	lactate dehydrogenase A [Source:HGNC Symbol;Acc:HGNC:6535]
943	0.31304995	5.92E-18	Early_pPSM	CCND2	cyclin D2 [Source:HGNC Symbol;Acc:HGNC:1583]
944	0.358647407	6.21E-18	Early_pPSM	SYT1	synaptotagmin 1 [Source:HGNC Symbol;Acc:HGNC:11509]
945	0.430451536	8.23E-18	Early_pPSM	MT2A	metallothionein 2A [Source:HGNC Symbol;Acc:HGNC:7406]
946	0.312059938	8.45E-18	Early_pPSM	RHOC	ras homolog family member C [Source:HGNC Symbol;Acc:HGNC:669]
947	0.572980396	1.46E-17	Early_pPSM	ARL4D	ADP ribosylation factor like GTPase 4D [Source:HGNC Symbol;Acc:HGNC:656]
948	0.316961504	2.32E-17	Early_pPSM	TIMM44	translocase of inner mitochondrial membrane 44 [Source:HGNC Symbol;Acc:HGNC:17316]
949	0.275378005	2.82E-17	Early_pPSM	MAFG	MAF bZIP transcription factor G [Source:HGNC Symbol;Acc:HGNC:6781]
950	0.288221659	2.99E-17	Early_pPSM	SNRPN	small nuclear ribonucleoprotein polypeptide N [Source:HGNC Symbol;Acc:HGNC:11164]
951	0.302269597	3.28E-17	Early_pPSM	VAMP5	vesicle associated membrane protein 5 [Source:HGNC Symbol;Acc:HGNC:12646]
952	0.29120472	3.74E-17	Early_pPSM	TNIK	TRAF2 and NCK interacting kinase [Source:HGNC Symbol;Acc:HGNC:30765]
953	0.288813662	8.39E-17	Early_pPSM	SLC1A5	solute carrier family 1 member 5 [Source:HGNC Symbol;Acc:HGNC:10943]
954	0.346066797	2.03E-16	Early_pPSM	HLA-C	major histocompatibility complex, class I, C [Source:HGNC Symbol;Acc:HGNC:4933]
955	0.299300908	4.92E-16	Early_pPSM	DHCR24	24-dehydrocholesterol reductase [Source:HGNC Symbol;Acc:HGNC:2859]
956	0.314876511	7.33E-16	Early_pPSM	XBP1	X-box binding protein 1 [Source:HGNC Symbol;Acc:HGNC:12801]
957	0.27311593	7.90E-16	Early_pPSM	KHDRBS3	KH RNA binding domain containing, signal transduction associated 3 [Source:HGNC Symbol;Acc:HGNC:18117]
958	0.290830178	9.32E-16	Early_pPSM	CD320	CD320 molecule [Source:HGNC Symbol;Acc:HGNC:16692]
959	0.288257235	1.18E-15	Early_pPSM	GHITM	growth hormone inducible transmembrane protein [Source:HGNC Symbol;Acc:HGNC:17281]
960	0.294814565	1.67E-15	Early_pPSM	ABHD12B	abhydrolase domain containing 12B [Source:HGNC Symbol;Acc:HGNC:19837]
961	0.285465791	5.01E-15	Early_pPSM	LSR	lipolysis stimulated lipoprotein receptor [Source:HGNC Symbol;Acc:HGNC:29572]
962	0.314356201	1.27E-14	Early_pPSM	BTG3	BTG anti-proliferation factor 3 [Source:HGNC Symbol;Acc:HGNC:1132]
963	0.300442372	1.27E-14	Early_pPSM	GSN	gelsolin [Source:HGNC Symbol;Acc:HGNC:4620]
964	0.263047199	2.89E-14	Early_pPSM	VIM	vimentin [Source:HGNC Symbol;Acc:HGNC:12692]
965	0.253201911	1.68E-13	Early_pPSM	DIAPH3	diaphanous related formin 3 [Source:HGNC Symbol;Acc:HGNC:15480]
966	0.281596108	2.50E-13	Early_pPSM	CTSC	cathepsin C [Source:HGNC Symbol;Acc:HGNC:2528]
967	0.289330309	2.67E-13	Early_pPSM	SLC39A1	solute carrier family 39 member 1 [Source:HGNC Symbol;Acc:HGNC:12876]
968	0.274654581	2.69E-13	Early_pPSM	EPRS	glutamyl-prolyl-tRNA synthetase [Source:HGNC Symbol;Acc:HGNC:3418]
969	0.302014223	4.89E-13	Early_pPSM	ACTN4	actinin alpha 4 [Source:HGNC Symbol;Acc:HGNC:166]
970	0.263154709	5.12E-13	Early_pPSM	RRAS2	RAS related 2 [Source:HGNC Symbol;Acc:HGNC:17271]
971	0.252616432	5.25E-13	Early_pPSM	TWF2	twinfilin actin binding protein 2 [Source:HGNC Symbol;Acc:HGNC:9621]
972	0.264222629	5.67E-13	Early_pPSM	STX3	syntaxin 3 [Source:HGNC Symbol;Acc:HGNC:11438]
973	0.278868773	8.30E-13	Early_pPSM	GJA1	gap junction protein alpha 1 [Source:HGNC Symbol;Acc:HGNC:4274]
974	0.258285392	1.38E-12	Early_pPSM	PRKCDBP	NA
975	0.30419806	1.52E-12	Early_pPSM	ABLIM1	actin binding LIM protein 1 [Source:HGNC Symbol;Acc:HGNC:78]
976	0.264511628	1.88E-12	Early_pPSM	CTTN	cortactin [Source:HGNC Symbol;Acc:HGNC:3338]
977	0.360880084	9.16E-12	Early_pPSM	FGF17	fibroblast growth factor 17 [Source:HGNC Symbol;Acc:HGNC:3673]
978	0.270632108	9.61E-12	Early_pPSM	AKAP12	A-kinase anchoring protein 12 [Source:HGNC Symbol;Acc:HGNC:370]
979	0.292375917	1.49E-11	Early_pPSM	ARL4C	ADP ribosylation factor like GTPase 4C [Source:HGNC Symbol;Acc:HGNC:698]
980	0.277366911	1.83E-11	Early_pPSM	SPG20	NA
981	0.25556398	2.17E-11	Early_pPSM	DNAJB11	DnaJ heat shock protein family (Hsp40) member B11 [Source:HGNC Symbol;Acc:HGNC:14889]
982	0.258308491	4.02E-11	Early_pPSM	LIMS1	LIM zinc finger domain containing 1 [Source:HGNC Symbol;Acc:HGNC:6616]
983	0.265057284	4.70E-11	Early_pPSM	RAB11FIP1	RAB11 family interacting protein 1 [Source:HGNC Symbol;Acc:HGNC:30265]
984	0.251908605	6.34E-11	Early_pPSM	MYBL2	MYB proto-oncogene like 2 [Source:HGNC Symbol;Acc:HGNC:7548]
985	0.253199734	6.51E-11	Early_pPSM	GULP1	GULP PTB domain containing engulfment adaptor 1 [Source:HGNC Symbol;Acc:HGNC:18649]
986	0.25608297	9.39E-11	Early_pPSM	MKNK2	MAPK interacting serine/threonine kinase 2 [Source:HGNC Symbol;Acc:HGNC:7111]
987	0.286685498	5.56E-10	Early_pPSM	TNFRSF11B	TNF receptor superfamily member 11b [Source:HGNC Symbol;Acc:HGNC:11909]
988	0.251660734	5.70E-10	Early_pPSM	SEC11C	SEC11 homolog C, signal peptidase complex subunit [Source:HGNC Symbol;Acc:HGNC:23400]
989	0.255464234	7.85E-10	Early_pPSM	FXYD5	FXYD domain containing ion transport regulator 5 [Source:HGNC Symbol;Acc:HGNC:4029]
990	0.264633408	3.02E-09	Early_pPSM	SPTAN1	spectrin alpha, non-erythrocytic 1 [Source:HGNC Symbol;Acc:HGNC:11273]
991	0.30165372	9.17E-09	Early_pPSM	MSX1	msh homeobox 1 [Source:HGNC Symbol;Acc:HGNC:7391]
992	0.262740152	1.29E-08	Early_pPSM	MTHFD1L	methylenetetrahydrofolate dehydrogenase (NADP+ dependent) 1 like [Source:HGNC Symbol;Acc:HGNC:21055]
993	0.251027878	1.42E-08	Early_pPSM	PHLDB2	pleckstrin homology like domain family B member 2 [Source:HGNC Symbol;Acc:HGNC:29573]
994	0.259686025	2.90E-08	Early_pPSM	UBE2S	ubiquitin conjugating enzyme E2 S [Source:HGNC Symbol;Acc:HGNC:17895]
995	0.254220319	4.02E-08	Early_pPSM	LRRFIP1	LRR binding FLII interacting protein 1 [Source:HGNC Symbol;Acc:HGNC:6702]
996	0.29365945	1.43E-05	Early_pPSM	MDM2	MDM2 proto-oncogene [Source:HGNC Symbol;Acc:HGNC:6973]
997	0.278427737	1	Early_pPSM	BCYRN1	brain cytoplasmic RNA 1 [Source:HGNC Symbol;Acc:HGNC:1022]
998	0.957099217	0	pPSM-1	DKK1	dickkopf WNT signaling pathway inhibitor 1 [Source:HGNC Symbol;Acc:HGNC:2891]
999	0.918559236	0	pPSM-1	FABP5	fatty acid binding protein 5 [Source:HGNC Symbol;Acc:HGNC:3560]
1000	0.881482075	0	pPSM-1	RSPO3	R-spondin 3 [Source:HGNC Symbol;Acc:HGNC:20866]
1001	0.877034164	0	pPSM-1	FST	follistatin [Source:HGNC Symbol;Acc:HGNC:3971]
1002	0.786544288	0	pPSM-1	LINC00458	long intergenic non-protein coding RNA 458 [Source:HGNC Symbol;Acc:HGNC:42807]
1003	0.746164134	0	pPSM-1	ODC1	ornithine decarboxylase 1 [Source:HGNC Symbol;Acc:HGNC:8109]
1004	0.716016849	0	pPSM-1	LIX1	limb and CNS expressed 1 [Source:HGNC Symbol;Acc:HGNC:18581]
1005	0.678133707	0	pPSM-1	HMGB3	high mobility group box 3 [Source:HGNC Symbol;Acc:HGNC:5004]
1006	0.672182985	0	pPSM-1	POMC	proopiomelanocortin [Source:HGNC Symbol;Acc:HGNC:9201]
1007	0.654946174	0	pPSM-1	PTGR1	prostaglandin reductase 1 [Source:HGNC Symbol;Acc:HGNC:18429]
1008	0.643408705	0	pPSM-1	ARL4D	ADP ribosylation factor like GTPase 4D [Source:HGNC Symbol;Acc:HGNC:656]
1009	0.608095596	0	pPSM-1	GSTO1	glutathione S-transferase omega 1 [Source:HGNC Symbol;Acc:HGNC:13312]
1010	0.561489175	0	pPSM-1	CNTFR	ciliary neurotrophic factor receptor [Source:HGNC Symbol;Acc:HGNC:2170]
1011	0.535725863	0	pPSM-1	APLNR	apelin receptor [Source:HGNC Symbol;Acc:HGNC:339]
1012	0.50304129	0	pPSM-1	TBX3	T-box transcription factor 3 [Source:HGNC Symbol;Acc:HGNC:11602]
1013	0.494440103	0	pPSM-1	SEPW1	NA
1014	0.494268159	0	pPSM-1	FOXH1	forkhead box H1 [Source:HGNC Symbol;Acc:HGNC:3814]
1015	0.492153655	0	pPSM-1	VAMP8	vesicle associated membrane protein 8 [Source:HGNC Symbol;Acc:HGNC:12647]
1016	0.48627788	0	pPSM-1	UBE2S	ubiquitin conjugating enzyme E2 S [Source:HGNC Symbol;Acc:HGNC:17895]
1017	0.459043603	0	pPSM-1	DIO3	iodothyronine deiodinase 3 [Source:HGNC Symbol;Acc:HGNC:2885]
1018	0.444271227	0	pPSM-1	PRDX1	peroxiredoxin 1 [Source:HGNC Symbol;Acc:HGNC:9352]
1019	0.443702316	0	pPSM-1	PCSK1	proprotein convertase subtilisin/kexin type 1 [Source:HGNC Symbol;Acc:HGNC:8743]
1020	0.437421043	0	pPSM-1	GALNT14	polypeptide N-acetylgalactosaminyltransferase 14 [Source:HGNC Symbol;Acc:HGNC:22946]
1021	0.422121213	0	pPSM-1	BAMBI	BMP and activin membrane bound inhibitor [Source:HGNC Symbol;Acc:HGNC:30251]
1022	0.377609541	0	pPSM-1	PPP1R17	protein phosphatase 1 regulatory subunit 17 [Source:HGNC Symbol;Acc:HGNC:16973]
1023	0.375475593	0	pPSM-1	RP11-149I23.3	NA
1024	0.37396553	0	pPSM-1	CALM1	calmodulin 1 [Source:HGNC Symbol;Acc:HGNC:1442]
1025	0.367826613	0	pPSM-1	RASGRP1	RAS guanyl releasing protein 1 [Source:HGNC Symbol;Acc:HGNC:9878]
1026	0.356904752	0	pPSM-1	PPIB	peptidylprolyl isomerase B [Source:HGNC Symbol;Acc:HGNC:9255]
1027	0.350852151	0	pPSM-1	DAD1	defender against cell death 1 [Source:HGNC Symbol;Acc:HGNC:2664]
1028	0.341389466	0	pPSM-1	TNFRSF9	TNF receptor superfamily member 9 [Source:HGNC Symbol;Acc:HGNC:11924]
1029	0.318300156	0	pPSM-1	H3F3B	H3 histone family member 3B [Source:HGNC Symbol;Acc:HGNC:4765]
1030	0.311083407	0	pPSM-1	GATA6	GATA binding protein 6 [Source:HGNC Symbol;Acc:HGNC:4174]
1031	0.311016155	0	pPSM-1	EIF3K	eukaryotic translation initiation factor 3 subunit K [Source:HGNC Symbol;Acc:HGNC:24656]
1032	0.629072681	1.51E-301	pPSM-1	PRSS2	serine protease 2 [Source:HGNC Symbol;Acc:HGNC:9483]
1033	0.298384041	5.97E-299	pPSM-1	RP11-474D1.3	NA
1034	0.683892685	1.08E-291	pPSM-1	NTS	neurotensin [Source:HGNC Symbol;Acc:HGNC:8038]
1035	0.508430902	7.06E-291	pPSM-1	HES6	hes family bHLH transcription factor 6 [Source:HGNC Symbol;Acc:HGNC:18254]
1036	0.316106138	3.29E-289	pPSM-1	ENO1	enolase 1 [Source:HGNC Symbol;Acc:HGNC:3350]
1037	0.615849899	9.03E-288	pPSM-1	FAM89A	family with sequence similarity 89 member A [Source:HGNC Symbol;Acc:HGNC:25057]
1038	0.44252439	2.30E-287	pPSM-1	PREX1	phosphatidylinositol-3,4,5-trisphosphate dependent Rac exchange factor 1 [Source:HGNC Symbol;Acc:HGNC:32594]
1039	0.441514416	1.71E-274	pPSM-1	SLC2A1	solute carrier family 2 member 1 [Source:HGNC Symbol;Acc:HGNC:11005]
1040	0.480196084	4.48E-272	pPSM-1	LINC01356	long intergenic non-protein coding RNA 1356 [Source:HGNC Symbol;Acc:HGNC:50587]
1041	0.41897418	1.42E-270	pPSM-1	GPAM	glycerol-3-phosphate acyltransferase, mitochondrial [Source:HGNC Symbol;Acc:HGNC:24865]
1042	0.478468692	2.89E-267	pPSM-1	RALGPS2	Ral GEF with PH domain and SH3 binding motif 2 [Source:HGNC Symbol;Acc:HGNC:30279]
1043	0.283397654	3.10E-265	pPSM-1	LAYN	layilin [Source:HGNC Symbol;Acc:HGNC:29471]
1044	0.270922084	5.79E-263	pPSM-1	POU5F1	POU class 5 homeobox 1 [Source:HGNC Symbol;Acc:HGNC:9221]
1045	0.512598611	8.11E-263	pPSM-1	SSTR2	somatostatin receptor 2 [Source:HGNC Symbol;Acc:HGNC:11331]
1046	0.373589707	5.11E-261	pPSM-1	GAL	galanin and GMAP prepropeptide [Source:HGNC Symbol;Acc:HGNC:4114]
1047	0.376566009	6.40E-259	pPSM-1	PPP1R14C	protein phosphatase 1 regulatory inhibitor subunit 14C [Source:HGNC Symbol;Acc:HGNC:14952]
1048	0.42610817	1.34E-257	pPSM-1	DLL1	delta like canonical Notch ligand 1 [Source:HGNC Symbol;Acc:HGNC:2908]
1049	0.275930828	2.17E-252	pPSM-1	OAZ1	ornithine decarboxylase antizyme 1 [Source:HGNC Symbol;Acc:HGNC:8095]
1050	0.455058071	5.38E-252	pPSM-1	COL6A1	collagen type VI alpha 1 chain [Source:HGNC Symbol;Acc:HGNC:2211]
1051	0.287878835	1.47E-251	pPSM-1	LZTS1	leucine zipper tumor suppressor 1 [Source:HGNC Symbol;Acc:HGNC:13861]
1052	0.252891146	2.39E-251	pPSM-1	RP11-788H18.1	NA
1053	0.512882915	7.17E-250	pPSM-1	MSX1	msh homeobox 1 [Source:HGNC Symbol;Acc:HGNC:7391]
1054	0.367642536	2.05E-249	pPSM-1	WDFY3	WD repeat and FYVE domain containing 3 [Source:HGNC Symbol;Acc:HGNC:20751]
1055	0.439514764	2.27E-249	pPSM-1	SERPINE2	serpin family E member 2 [Source:HGNC Symbol;Acc:HGNC:8951]
1056	0.361776367	5.45E-246	pPSM-1	TTC39B	tetratricopeptide repeat domain 39B [Source:HGNC Symbol;Acc:HGNC:23704]
1057	0.373262554	8.27E-240	pPSM-1	FLRT3	fibronectin leucine rich transmembrane protein 3 [Source:HGNC Symbol;Acc:HGNC:3762]
1058	0.419327225	6.58E-235	pPSM-1	RAP2B	RAP2B, member of RAS oncogene family [Source:HGNC Symbol;Acc:HGNC:9862]
1059	0.479396851	2.09E-233	pPSM-1	TNFRSF11B	TNF receptor superfamily member 11b [Source:HGNC Symbol;Acc:HGNC:11909]
1060	0.305504814	4.46E-227	pPSM-1	FSCN1	fascin actin-bundling protein 1 [Source:HGNC Symbol;Acc:HGNC:11148]
1061	0.317652148	1.87E-226	pPSM-1	CD1D	CD1d molecule [Source:HGNC Symbol;Acc:HGNC:1637]
1062	0.403597935	3.13E-223	pPSM-1	CYB5A	cytochrome b5 type A [Source:HGNC Symbol;Acc:HGNC:2570]
1063	0.36892065	6.94E-222	pPSM-1	TNIK	TRAF2 and NCK interacting kinase [Source:HGNC Symbol;Acc:HGNC:30765]
1064	0.301533311	7.63E-215	pPSM-1	TMEM54	transmembrane protein 54 [Source:HGNC Symbol;Acc:HGNC:24143]
1065	0.338105711	1.74E-214	pPSM-1	HVCN1	hydrogen voltage gated channel 1 [Source:HGNC Symbol;Acc:HGNC:28240]
1066	0.424553072	7.84E-214	pPSM-1	T	NA
1067	0.261198713	1.44E-211	pPSM-1	DENND2C	DENN domain containing 2C [Source:HGNC Symbol;Acc:HGNC:24748]
1068	0.343218073	3.59E-210	pPSM-1	ENC1	ectodermal-neural cortex 1 [Source:HGNC Symbol;Acc:HGNC:3345]
1069	0.342311231	1.41E-209	pPSM-1	CTSV	cathepsin V [Source:HGNC Symbol;Acc:HGNC:2538]
1070	0.42919347	2.04E-204	pPSM-1	DLL3	delta like canonical Notch ligand 3 [Source:HGNC Symbol;Acc:HGNC:2909]
1071	0.323363789	9.54E-204	pPSM-1	CD200	CD200 molecule [Source:HGNC Symbol;Acc:HGNC:7203]
1072	0.405465978	2.80E-203	pPSM-1	IGFBPL1	insulin like growth factor binding protein like 1 [Source:HGNC Symbol;Acc:HGNC:20081]
1073	0.368388059	5.47E-203	pPSM-1	CCND1	cyclin D1 [Source:HGNC Symbol;Acc:HGNC:1582]
1074	0.359812859	4.07E-202	pPSM-1	PRSS1	serine protease 1 [Source:HGNC Symbol;Acc:HGNC:9475]
1075	0.300196525	7.51E-202	pPSM-1	PKM	pyruvate kinase M1/2 [Source:HGNC Symbol;Acc:HGNC:9021]
1076	0.277225672	1.89E-201	pPSM-1	ANP32A	acidic nuclear phosphoprotein 32 family member A [Source:HGNC Symbol;Acc:HGNC:13233]
1077	0.306414648	3.85E-201	pPSM-1	MMP15	matrix metallopeptidase 15 [Source:HGNC Symbol;Acc:HGNC:7161]
1078	0.278931288	5.47E-199	pPSM-1	MIXL1	Mix paired-like homeobox [Source:HGNC Symbol;Acc:HGNC:13363]
1079	0.34131557	2.76E-195	pPSM-1	FAM159B	NA
1080	0.405182639	5.87E-194	pPSM-1	PDLIM2	PDZ and LIM domain 2 [Source:HGNC Symbol;Acc:HGNC:13992]
1081	0.372426429	1.02E-193	pPSM-1	ABLIM1	actin binding LIM protein 1 [Source:HGNC Symbol;Acc:HGNC:78]
1082	0.292842144	2.18E-193	pPSM-1	GMPR	guanosine monophosphate reductase [Source:HGNC Symbol;Acc:HGNC:4376]
1083	0.307082351	1.64E-186	pPSM-1	DNAJA1	DnaJ heat shock protein family (Hsp40) member A1 [Source:HGNC Symbol;Acc:HGNC:5229]
1084	0.323832505	6.18E-186	pPSM-1	BMP7	bone morphogenetic protein 7 [Source:HGNC Symbol;Acc:HGNC:1074]
1085	0.262240372	1.79E-184	pPSM-1	DDX58	DExD/H-box helicase 58 [Source:HGNC Symbol;Acc:HGNC:19102]
1086	0.275519714	1.13E-183	pPSM-1	SNAI2	snail family transcriptional repressor 2 [Source:HGNC Symbol;Acc:HGNC:11094]
1087	0.338905967	7.12E-183	pPSM-1	WWP1	WW domain containing E3 ubiquitin protein ligase 1 [Source:HGNC Symbol;Acc:HGNC:17004]
1088	0.327730559	7.89E-183	pPSM-1	CA2	carbonic anhydrase 2 [Source:HGNC Symbol;Acc:HGNC:1373]
1089	0.350785348	2.07E-179	pPSM-1	TTC29	tetratricopeptide repeat domain 29 [Source:HGNC Symbol;Acc:HGNC:29936]
1090	0.383616709	8.33E-179	pPSM-1	WNT5A	Wnt family member 5A [Source:HGNC Symbol;Acc:HGNC:12784]
1091	0.403449603	2.05E-178	pPSM-1	FGF17	fibroblast growth factor 17 [Source:HGNC Symbol;Acc:HGNC:3673]
1092	0.275716085	2.34E-176	pPSM-1	UBE2L3	ubiquitin conjugating enzyme E2 L3 [Source:HGNC Symbol;Acc:HGNC:12488]
1093	0.3369099	1.37E-174	pPSM-1	PROX1	prospero homeobox 1 [Source:HGNC Symbol;Acc:HGNC:9459]
1094	0.392749146	5.88E-174	pPSM-1	C2orf40	NA
1095	0.347717267	9.90E-173	pPSM-1	HSPH1	heat shock protein family H (Hsp110) member 1 [Source:HGNC Symbol;Acc:HGNC:16969]
1096	0.319654046	4.34E-171	pPSM-1	SSX2IP	SSX family member 2 interacting protein [Source:HGNC Symbol;Acc:HGNC:16509]
1097	0.334844802	4.91E-171	pPSM-1	HSPA5	heat shock protein family A (Hsp70) member 5 [Source:HGNC Symbol;Acc:HGNC:5238]
1098	0.381321742	1.11E-170	pPSM-1	DACT1	dishevelled binding antagonist of beta catenin 1 [Source:HGNC Symbol;Acc:HGNC:17748]
1099	0.308202746	1.83E-170	pPSM-1	NUDT9	nudix hydrolase 9 [Source:HGNC Symbol;Acc:HGNC:8056]
1100	0.335974965	5.30E-168	pPSM-1	CRABP2	cellular retinoic acid binding protein 2 [Source:HGNC Symbol;Acc:HGNC:2339]
1101	0.340629145	6.20E-167	pPSM-1	SP5	Sp5 transcription factor [Source:HGNC Symbol;Acc:HGNC:14529]
1102	0.395037572	8.40E-166	pPSM-1	SLC39A8	solute carrier family 39 member 8 [Source:HGNC Symbol;Acc:HGNC:20862]
1103	0.305549352	4.01E-163	pPSM-1	DMKN	dermokine [Source:HGNC Symbol;Acc:HGNC:25063]
1104	0.340406572	6.18E-159	pPSM-1	USB1	U6 snRNA biogenesis phosphodiesterase 1 [Source:HGNC Symbol;Acc:HGNC:25792]
1105	0.350807678	1.37E-155	pPSM-1	FJX1	four-jointed box kinase 1 [Source:HGNC Symbol;Acc:HGNC:17166]
1106	0.298063999	3.88E-155	pPSM-1	ZNF814	zinc finger protein 814 [Source:HGNC Symbol;Acc:HGNC:33258]
1107	0.311343229	2.73E-154	pPSM-1	SH3D19	SH3 domain containing 19 [Source:HGNC Symbol;Acc:HGNC:30418]
1108	0.292627934	1.25E-152	pPSM-1	B3GNT2	UDP-GlcNAc:betaGal beta-1,3-N-acetylglucosaminyltransferase 2 [Source:HGNC Symbol;Acc:HGNC:15629]
1109	0.273266108	2.40E-152	pPSM-1	CENPW	centromere protein W [Source:HGNC Symbol;Acc:HGNC:21488]
1110	0.27164047	2.63E-152	pPSM-1	MYL12A	myosin light chain 12A [Source:HGNC Symbol;Acc:HGNC:16701]
1111	0.296538048	1.02E-151	pPSM-1	ATP6AP1L	ATPase H+ transporting accessory protein 1 like [Source:HGNC Symbol;Acc:HGNC:28091]
1112	0.301845347	1.18E-151	pPSM-1	HK1	hexokinase 1 [Source:HGNC Symbol;Acc:HGNC:4922]
1113	0.295468555	6.18E-150	pPSM-1	CKB	creatine kinase B [Source:HGNC Symbol;Acc:HGNC:1991]
1114	0.270940213	1.34E-146	pPSM-1	SIPA1L2	signal induced proliferation associated 1 like 2 [Source:HGNC Symbol;Acc:HGNC:23800]
1115	0.364111157	1.74E-145	pPSM-1	IFT57	intraflagellar transport 57 [Source:HGNC Symbol;Acc:HGNC:17367]
1116	0.314805353	3.03E-145	pPSM-1	FRMD4A	FERM domain containing 4A [Source:HGNC Symbol;Acc:HGNC:25491]
1117	0.266342146	1.32E-142	pPSM-1	TUBB4B	tubulin beta 4B class IVb [Source:HGNC Symbol;Acc:HGNC:20771]
1118	0.252471107	2.90E-142	pPSM-1	KRT10	keratin 10 [Source:HGNC Symbol;Acc:HGNC:6413]
1119	0.328014619	1.33E-139	pPSM-1	CDC20	cell division cycle 20 [Source:HGNC Symbol;Acc:HGNC:1723]
1120	0.316678858	3.34E-139	pPSM-1	DYNC1LI1	dynein cytoplasmic 1 light intermediate chain 1 [Source:HGNC Symbol;Acc:HGNC:18745]
1121	0.316404338	2.33E-137	pPSM-1	SERINC5	serine incorporator 5 [Source:HGNC Symbol;Acc:HGNC:18825]
1122	0.259221603	1.55E-136	pPSM-1	LDHA	lactate dehydrogenase A [Source:HGNC Symbol;Acc:HGNC:6535]
1123	0.305981832	6.71E-136	pPSM-1	C12orf75	chromosome 12 open reading frame 75 [Source:HGNC Symbol;Acc:HGNC:35164]
1124	0.262822217	3.38E-135	pPSM-1	CKS1B	CDC28 protein kinase regulatory subunit 1B [Source:HGNC Symbol;Acc:HGNC:19083]
1125	0.25536145	8.38E-135	pPSM-1	TUBB2A	tubulin beta 2A class IIa [Source:HGNC Symbol;Acc:HGNC:12412]
1126	0.353859839	2.44E-134	pPSM-1	CKS2	CDC28 protein kinase regulatory subunit 2 [Source:HGNC Symbol;Acc:HGNC:2000]
1127	0.264895449	3.05E-134	pPSM-1	TUBA1C	tubulin alpha 1c [Source:HGNC Symbol;Acc:HGNC:20768]
1128	0.298581933	4.50E-133	pPSM-1	ZNF703	zinc finger protein 703 [Source:HGNC Symbol;Acc:HGNC:25883]
1129	0.33907266	2.11E-132	pPSM-1	CCNB1	cyclin B1 [Source:HGNC Symbol;Acc:HGNC:1579]
1130	0.280698095	5.77E-132	pPSM-1	RDX	radixin [Source:HGNC Symbol;Acc:HGNC:9944]
1131	0.325045019	1.58E-131	pPSM-1	SDF2L1	stromal cell derived factor 2 like 1 [Source:HGNC Symbol;Acc:HGNC:10676]
1132	0.296369121	6.25E-131	pPSM-1	WFDC2	WAP four-disulfide core domain 2 [Source:HGNC Symbol;Acc:HGNC:15939]
1133	0.311072622	6.26E-131	pPSM-1	MANF	mesencephalic astrocyte derived neurotrophic factor [Source:HGNC Symbol;Acc:HGNC:15461]
1134	0.27744164	1.66E-128	pPSM-1	TBX6	T-box transcription factor 6 [Source:HGNC Symbol;Acc:HGNC:11605]
1135	0.333169049	2.48E-128	pPSM-1	DYNLL2	dynein light chain LC8-type 2 [Source:HGNC Symbol;Acc:HGNC:24596]
1136	0.298596549	3.03E-126	pPSM-1	IFITM3	interferon induced transmembrane protein 3 [Source:HGNC Symbol;Acc:HGNC:5414]
1137	0.286663198	6.88E-125	pPSM-1	AKAP12	A-kinase anchoring protein 12 [Source:HGNC Symbol;Acc:HGNC:370]
1138	0.27923615	3.32E-124	pPSM-1	GJA1	gap junction protein alpha 1 [Source:HGNC Symbol;Acc:HGNC:4274]
1139	0.259357642	1.92E-121	pPSM-1	RCN1	reticulocalbin 1 [Source:HGNC Symbol;Acc:HGNC:9934]
1140	0.252097659	6.72E-117	pPSM-1	BOD1	biorientation of chromosomes in cell division 1 [Source:HGNC Symbol;Acc:HGNC:25114]
1141	0.252698461	2.05E-116	pPSM-1	MDFIC	MyoD family inhibitor domain containing [Source:HGNC Symbol;Acc:HGNC:28870]
1142	0.28464019	1.62E-115	pPSM-1	HSD17B7	hydroxysteroid 17-beta dehydrogenase 7 [Source:HGNC Symbol;Acc:HGNC:5215]
1143	0.264378642	3.96E-113	pPSM-1	BLVRA	biliverdin reductase A [Source:HGNC Symbol;Acc:HGNC:1062]
1144	0.270603169	4.68E-113	pPSM-1	BTG2	BTG anti-proliferation factor 2 [Source:HGNC Symbol;Acc:HGNC:1131]
1145	0.283380545	6.99E-112	pPSM-1	STX3	syntaxin 3 [Source:HGNC Symbol;Acc:HGNC:11438]
1146	0.255997123	2.52E-111	pPSM-1	MYDGF	myeloid derived growth factor [Source:HGNC Symbol;Acc:HGNC:16948]
1147	0.34387452	7.44E-108	pPSM-1	MGST2	microsomal glutathione S-transferase 2 [Source:HGNC Symbol;Acc:HGNC:7063]
1148	0.28078022	7.96E-107	pPSM-1	CDX2	caudal type homeobox 2 [Source:HGNC Symbol;Acc:HGNC:1806]
1149	0.251525976	3.50E-106	pPSM-1	ZFP42	ZFP42 zinc finger protein [Source:HGNC Symbol;Acc:HGNC:30949]
1150	0.279179387	1.73E-105	pPSM-1	LGALSL	galectin like [Source:HGNC Symbol;Acc:HGNC:25012]
1151	0.257640283	1.32E-103	pPSM-1	IDH1	isocitrate dehydrogenase (NADP(+)) 1, cytosolic [Source:HGNC Symbol;Acc:HGNC:5382]
1152	0.267837211	1.10E-102	pPSM-1	FKBP4	FKBP prolyl isomerase 4 [Source:HGNC Symbol;Acc:HGNC:3720]
1153	0.254505847	1.95E-101	pPSM-1	WNT5B	Wnt family member 5B [Source:HGNC Symbol;Acc:HGNC:16265]
1154	0.27220506	7.01E-101	pPSM-1	DLGAP5	DLG associated protein 5 [Source:HGNC Symbol;Acc:HGNC:16864]
1155	0.268075887	1.97E-98	pPSM-1	HLA-C	major histocompatibility complex, class I, C [Source:HGNC Symbol;Acc:HGNC:4933]
1156	0.336664509	1.22E-96	pPSM-1	FAM210B	family with sequence similarity 210 member B [Source:HGNC Symbol;Acc:HGNC:16102]
1157	0.250992676	2.76E-95	pPSM-1	BNIP3	BCL2 interacting protein 3 [Source:HGNC Symbol;Acc:HGNC:1084]
1158	0.255614036	5.18E-95	pPSM-1	TMOD3	tropomodulin 3 [Source:HGNC Symbol;Acc:HGNC:11873]
1159	0.254828036	2.79E-94	pPSM-1	CDKN2AIPNL	CDKN2A interacting protein N-terminal like [Source:HGNC Symbol;Acc:HGNC:30545]
1160	0.282573193	7.84E-87	pPSM-1	CRNDE	colorectal neoplasia differentially expressed [Source:HGNC Symbol;Acc:HGNC:37078]
1161	0.275710873	2.29E-86	pPSM-1	HMMR	hyaluronan mediated motility receptor [Source:HGNC Symbol;Acc:HGNC:5012]
1162	0.402246035	1.94E-84	pPSM-1	KRT19	keratin 19 [Source:HGNC Symbol;Acc:HGNC:6436]
1163	0.255216127	2.56E-77	pPSM-1	TPX2	TPX2 microtubule nucleation factor [Source:HGNC Symbol;Acc:HGNC:1249]
1164	0.251952367	6.39E-69	pPSM-1	LMO2	LIM domain only 2 [Source:HGNC Symbol;Acc:HGNC:6642]
1165	0.283224675	1.47E-65	pPSM-1	FN1	fibronectin 1 [Source:HGNC Symbol;Acc:HGNC:3778]
1166	0.280118564	5.44E-65	pPSM-1	SYT1	synaptotagmin 1 [Source:HGNC Symbol;Acc:HGNC:11509]
1167	0.363260361	1.63E-62	pPSM-1	RP11-148B6.1	NA
1168	0.324484035	5.42E-52	pPSM-1	AURKA	aurora kinase A [Source:HGNC Symbol;Acc:HGNC:11393]
1169	0.277871455	1.17E-18	pPSM-1	UBE2C	ubiquitin conjugating enzyme E2 C [Source:HGNC Symbol;Acc:HGNC:15937]
1170	0.27576437	4.07E-10	pPSM-1	BCYRN1	brain cytoplasmic RNA 1 [Source:HGNC Symbol;Acc:HGNC:1022]
1171	1.419633244	0	pPSM-2	HIST1H1D	histone cluster 1 H1 family member d [Source:HGNC Symbol;Acc:HGNC:4717]
1172	1.045725375	0	pPSM-2	HIST1H1B	histone cluster 1 H1 family member b [Source:HGNC Symbol;Acc:HGNC:4719]
1173	0.850422953	0	pPSM-2	POMC	proopiomelanocortin [Source:HGNC Symbol;Acc:HGNC:9201]
1174	0.841657383	0	pPSM-2	HIST1H1E	histone cluster 1 H1 family member e [Source:HGNC Symbol;Acc:HGNC:4718]
1175	0.804575201	0	pPSM-2	HIST1H4C	histone cluster 1 H4 family member c [Source:HGNC Symbol;Acc:HGNC:4787]
1176	0.796096453	0	pPSM-2	FABP5	fatty acid binding protein 5 [Source:HGNC Symbol;Acc:HGNC:3560]
1177	0.725699318	0	pPSM-2	HIST1H1C	histone cluster 1 H1 family member c [Source:HGNC Symbol;Acc:HGNC:4716]
1178	0.701319998	0	pPSM-2	LIX1	limb and CNS expressed 1 [Source:HGNC Symbol;Acc:HGNC:18581]
1179	0.695171593	0	pPSM-2	DKK1	dickkopf WNT signaling pathway inhibitor 1 [Source:HGNC Symbol;Acc:HGNC:2891]
1180	0.687079858	0	pPSM-2	HES6	hes family bHLH transcription factor 6 [Source:HGNC Symbol;Acc:HGNC:18254]
1181	0.682061964	0	pPSM-2	HIST1H3B	histone cluster 1 H3 family member b [Source:HGNC Symbol;Acc:HGNC:4776]
1182	0.673051268	0	pPSM-2	ODC1	ornithine decarboxylase 1 [Source:HGNC Symbol;Acc:HGNC:8109]
1183	0.656138057	0	pPSM-2	PTGR1	prostaglandin reductase 1 [Source:HGNC Symbol;Acc:HGNC:18429]
1184	0.62942739	0	pPSM-2	ARL4D	ADP ribosylation factor like GTPase 4D [Source:HGNC Symbol;Acc:HGNC:656]
1185	0.620293817	0	pPSM-2	CNTFR	ciliary neurotrophic factor receptor [Source:HGNC Symbol;Acc:HGNC:2170]
1186	0.612764296	0	pPSM-2	HIST1H4H	histone cluster 1 H4 family member h [Source:HGNC Symbol;Acc:HGNC:4788]
1187	0.573401986	0	pPSM-2	SEPW1	NA
1188	0.556888286	0	pPSM-2	GAL	galanin and GMAP prepropeptide [Source:HGNC Symbol;Acc:HGNC:4114]
1189	0.55170413	0	pPSM-2	HMGB3	high mobility group box 3 [Source:HGNC Symbol;Acc:HGNC:5004]
1190	0.54909722	0	pPSM-2	HIST1H2AL	histone cluster 1 H2A family member l [Source:HGNC Symbol;Acc:HGNC:4730]
1191	0.545869738	0	pPSM-2	GSTO1	glutathione S-transferase omega 1 [Source:HGNC Symbol;Acc:HGNC:13312]
1192	0.53829069	0	pPSM-2	APLNR	apelin receptor [Source:HGNC Symbol;Acc:HGNC:339]
1193	0.533424265	0	pPSM-2	HIST1H3F	histone cluster 1 H3 family member f [Source:HGNC Symbol;Acc:HGNC:4773]
1194	0.532801027	0	pPSM-2	VAMP8	vesicle associated membrane protein 8 [Source:HGNC Symbol;Acc:HGNC:12647]
1195	0.531404831	0	pPSM-2	HIST1H3G	histone cluster 1 H3 family member g [Source:HGNC Symbol;Acc:HGNC:4772]
1196	0.529182246	0	pPSM-2	PCSK1	proprotein convertase subtilisin/kexin type 1 [Source:HGNC Symbol;Acc:HGNC:8743]
1197	0.521753286	0	pPSM-2	GALNT14	polypeptide N-acetylgalactosaminyltransferase 14 [Source:HGNC Symbol;Acc:HGNC:22946]
1198	0.517174108	0	pPSM-2	HIST1H2AK	histone cluster 1 H2A family member k [Source:HGNC Symbol;Acc:HGNC:4726]
1199	0.512831063	0	pPSM-2	TBX3	T-box transcription factor 3 [Source:HGNC Symbol;Acc:HGNC:11602]
1200	0.493971002	0	pPSM-2	HIST1H2BC	histone cluster 1 H2B family member c [Source:HGNC Symbol;Acc:HGNC:4757]
1201	0.493712678	0	pPSM-2	HIST2H2AC	histone cluster 2 H2A family member c [Source:HGNC Symbol;Acc:HGNC:4738]
1202	0.485828907	0	pPSM-2	RASGRP1	RAS guanyl releasing protein 1 [Source:HGNC Symbol;Acc:HGNC:9878]
1203	0.464551857	0	pPSM-2	HIST2H2BF	histone cluster 2 H2B family member f [Source:HGNC Symbol;Acc:HGNC:24700]
1204	0.461757401	0	pPSM-2	HIST1H2BF	histone cluster 1 H2B family member f [Source:HGNC Symbol;Acc:HGNC:4752]
1205	0.452903029	0	pPSM-2	HIST1H3J	histone cluster 1 H3 family member j [Source:HGNC Symbol;Acc:HGNC:4774]
1206	0.4504721	0	pPSM-2	TTC39B	tetratricopeptide repeat domain 39B [Source:HGNC Symbol;Acc:HGNC:23704]
1207	0.447605123	0	pPSM-2	PRDX1	peroxiredoxin 1 [Source:HGNC Symbol;Acc:HGNC:9352]
1208	0.424739633	0	pPSM-2	PPP1R17	protein phosphatase 1 regulatory subunit 17 [Source:HGNC Symbol;Acc:HGNC:16973]
1209	0.399886582	0	pPSM-2	GATA6	GATA binding protein 6 [Source:HGNC Symbol;Acc:HGNC:4174]
1210	0.399371174	0	pPSM-2	CALM1	calmodulin 1 [Source:HGNC Symbol;Acc:HGNC:1442]
1211	0.390514391	0	pPSM-2	LAYN	layilin [Source:HGNC Symbol;Acc:HGNC:29471]
1212	0.374582144	0	pPSM-2	EIF3K	eukaryotic translation initiation factor 3 subunit K [Source:HGNC Symbol;Acc:HGNC:24656]
1213	0.35369351	0	pPSM-2	ENO1	enolase 1 [Source:HGNC Symbol;Acc:HGNC:3350]
1214	0.33392563	0	pPSM-2	TNFRSF9	TNF receptor superfamily member 9 [Source:HGNC Symbol;Acc:HGNC:11924]
1215	0.74873914	1.59E-303	pPSM-2	NTS	neurotensin [Source:HGNC Symbol;Acc:HGNC:8038]
1216	0.527185879	1.64E-300	pPSM-2	CYB5A	cytochrome b5 type A [Source:HGNC Symbol;Acc:HGNC:2570]
1217	0.332924893	6.28E-299	pPSM-2	RP11-474D1.3	NA
1218	0.41328359	8.04E-299	pPSM-2	HIST1H2AE	histone cluster 1 H2A family member e [Source:HGNC Symbol;Acc:HGNC:4724]
1219	0.633518321	1.02E-295	pPSM-2	FST	follistatin [Source:HGNC Symbol;Acc:HGNC:3971]
1220	0.373431035	1.18E-294	pPSM-2	RP11-149I23.3	NA
1221	0.26138065	1.56E-293	pPSM-2	KCNK17	potassium two pore domain channel subfamily K member 17 [Source:HGNC Symbol;Acc:HGNC:14465]
1222	0.279720484	5.33E-293	pPSM-2	PARK7	Parkinsonism associated deglycase [Source:HGNC Symbol;Acc:HGNC:16369]
1223	0.481535515	2.53E-288	pPSM-2	HIST1H2AC	histone cluster 1 H2A family member c [Source:HGNC Symbol;Acc:HGNC:4733]
1224	0.421328859	4.60E-288	pPSM-2	WDFY3	WD repeat and FYVE domain containing 3 [Source:HGNC Symbol;Acc:HGNC:20751]
1225	0.514767805	1.06E-286	pPSM-2	HIST1H2AH	histone cluster 1 H2A family member h [Source:HGNC Symbol;Acc:HGNC:13671]
1226	0.449912179	6.25E-284	pPSM-2	HIST1H3H	histone cluster 1 H3 family member h [Source:HGNC Symbol;Acc:HGNC:4775]
1227	0.459086482	1.09E-283	pPSM-2	PREX1	phosphatidylinositol-3,4,5-trisphosphate dependent Rac exchange factor 1 [Source:HGNC Symbol;Acc:HGNC:32594]
1228	0.319633885	8.00E-281	pPSM-2	OAZ1	ornithine decarboxylase antizyme 1 [Source:HGNC Symbol;Acc:HGNC:8095]
1229	0.645615247	9.57E-279	pPSM-2	FAM89A	family with sequence similarity 89 member A [Source:HGNC Symbol;Acc:HGNC:25057]
1230	0.580711574	3.83E-278	pPSM-2	RSPO3	R-spondin 3 [Source:HGNC Symbol;Acc:HGNC:20866]
1231	0.372556089	6.47E-278	pPSM-2	HIST1H2AB	histone cluster 1 H2A family member b [Source:HGNC Symbol;Acc:HGNC:4734]
1232	0.356398926	9.52E-278	pPSM-2	PPIB	peptidylprolyl isomerase B [Source:HGNC Symbol;Acc:HGNC:9255]
1233	0.418730844	1.05E-271	pPSM-2	ADAMTSL2	ADAMTS like 2 [Source:HGNC Symbol;Acc:HGNC:14631]
1234	0.357539413	1.47E-269	pPSM-2	DAD1	defender against cell death 1 [Source:HGNC Symbol;Acc:HGNC:2664]
1235	0.420767776	3.06E-269	pPSM-2	HIST1H2BH	histone cluster 1 H2B family member h [Source:HGNC Symbol;Acc:HGNC:4755]
1236	0.407051925	3.51E-263	pPSM-2	HIST1H4I	histone cluster 1 H4 family member i [Source:HGNC Symbol;Acc:HGNC:4793]
1237	0.269335021	3.44E-260	pPSM-2	LGR5	leucine rich repeat containing G protein-coupled receptor 5 [Source:HGNC Symbol;Acc:HGNC:4504]
1238	0.465717649	4.07E-257	pPSM-2	FOXH1	forkhead box H1 [Source:HGNC Symbol;Acc:HGNC:3814]
1239	0.479650254	5.21E-256	pPSM-2	IGFBPL1	insulin like growth factor binding protein like 1 [Source:HGNC Symbol;Acc:HGNC:20081]
1240	0.39769547	1.09E-250	pPSM-2	LINC01356	long intergenic non-protein coding RNA 1356 [Source:HGNC Symbol;Acc:HGNC:50587]
1241	0.288652421	3.72E-248	pPSM-2	RP11-788H18.1	NA
1242	0.404417967	1.25E-245	pPSM-2	PPP1R14C	protein phosphatase 1 regulatory inhibitor subunit 14C [Source:HGNC Symbol;Acc:HGNC:14952]
1243	0.387082559	3.74E-245	pPSM-2	BAMBI	BMP and activin membrane bound inhibitor [Source:HGNC Symbol;Acc:HGNC:30251]
1244	0.452259791	3.27E-243	pPSM-2	HIST1H2AG	histone cluster 1 H2A family member g [Source:HGNC Symbol;Acc:HGNC:4737]
1245	0.346230524	1.61E-240	pPSM-2	CD1D	CD1d molecule [Source:HGNC Symbol;Acc:HGNC:1637]
1246	0.315641751	1.29E-238	pPSM-2	HIST2H4B	histone cluster 2 H4 family member b [Source:HGNC Symbol;Acc:HGNC:29607]
1247	0.313199103	2.73E-237	pPSM-2	POU5F1	POU class 5 homeobox 1 [Source:HGNC Symbol;Acc:HGNC:9221]
1248	0.46920584	1.09E-235	pPSM-2	C2orf40	NA
1249	0.574077979	8.99E-235	pPSM-2	LINC00458	long intergenic non-protein coding RNA 458 [Source:HGNC Symbol;Acc:HGNC:42807]
1250	0.331795681	4.05E-234	pPSM-2	TMEM54	transmembrane protein 54 [Source:HGNC Symbol;Acc:HGNC:24143]
1251	0.356602754	1.82E-228	pPSM-2	HIST1H4D	histone cluster 1 H4 family member d [Source:HGNC Symbol;Acc:HGNC:4782]
1252	0.503833677	4.65E-225	pPSM-2	MSX1	msh homeobox 1 [Source:HGNC Symbol;Acc:HGNC:7391]
1253	0.391333324	5.76E-224	pPSM-2	SLC2A1	solute carrier family 2 member 1 [Source:HGNC Symbol;Acc:HGNC:11005]
1254	0.268256891	1.33E-223	pPSM-2	HIST1H2AJ	histone cluster 1 H2A family member j [Source:HGNC Symbol;Acc:HGNC:4727]
1255	0.49105291	3.31E-222	pPSM-2	SLC39A8	solute carrier family 39 member 8 [Source:HGNC Symbol;Acc:HGNC:20862]
1256	0.477633196	3.43E-222	pPSM-2	DLL3	delta like canonical Notch ligand 3 [Source:HGNC Symbol;Acc:HGNC:2909]
1257	0.346946627	1.09E-215	pPSM-2	GMPR	guanosine monophosphate reductase [Source:HGNC Symbol;Acc:HGNC:4376]
1258	0.261086343	6.07E-215	pPSM-2	HSPD1	heat shock protein family D (Hsp60) member 1 [Source:HGNC Symbol;Acc:HGNC:5261]
1259	0.448846034	1.00E-214	pPSM-2	COL6A1	collagen type VI alpha 1 chain [Source:HGNC Symbol;Acc:HGNC:2211]
1260	0.460482308	2.62E-214	pPSM-2	SSTR2	somatostatin receptor 2 [Source:HGNC Symbol;Acc:HGNC:11331]
1261	0.278992952	1.18E-213	pPSM-2	TXN	thioredoxin [Source:HGNC Symbol;Acc:HGNC:12435]
1262	0.369489522	1.05E-212	pPSM-2	NETO2	neuropilin and tolloid like 2 [Source:HGNC Symbol;Acc:HGNC:14644]
1263	0.378294848	5.31E-212	pPSM-2	EGR1	early growth response 1 [Source:HGNC Symbol;Acc:HGNC:3238]
1264	0.381981947	5.41E-208	pPSM-2	KIAA0101	NA
1265	0.409005782	2.20E-207	pPSM-2	RRM2	ribonucleotide reductase regulatory subunit M2 [Source:HGNC Symbol;Acc:HGNC:10452]
1266	0.409025041	3.88E-205	pPSM-2	ABLIM1	actin binding LIM protein 1 [Source:HGNC Symbol;Acc:HGNC:78]
1267	0.398815216	2.75E-204	pPSM-2	TBX6	T-box transcription factor 6 [Source:HGNC Symbol;Acc:HGNC:11605]
1268	0.434985656	5.50E-203	pPSM-2	RALGPS2	Ral GEF with PH domain and SH3 binding motif 2 [Source:HGNC Symbol;Acc:HGNC:30279]
1269	0.314849204	7.33E-202	pPSM-2	HIST2H2AA4	histone cluster 2 H2A family member a4 [Source:HGNC Symbol;Acc:HGNC:29668]
1270	0.297408628	2.42E-200	pPSM-2	TRABD2A	TraB domain containing 2A [Source:HGNC Symbol;Acc:HGNC:27013]
1271	0.292811328	7.24E-200	pPSM-2	ANP32A	acidic nuclear phosphoprotein 32 family member A [Source:HGNC Symbol;Acc:HGNC:13233]
1272	0.393527849	7.72E-198	pPSM-2	FEN1	flap structure-specific endonuclease 1 [Source:HGNC Symbol;Acc:HGNC:3650]
1273	0.281823069	1.78E-197	pPSM-2	DIO3	iodothyronine deiodinase 3 [Source:HGNC Symbol;Acc:HGNC:2885]
1274	0.385701789	1.83E-196	pPSM-2	SSX2IP	SSX family member 2 interacting protein [Source:HGNC Symbol;Acc:HGNC:16509]
1275	0.302982409	4.25E-196	pPSM-2	FSCN1	fascin actin-bundling protein 1 [Source:HGNC Symbol;Acc:HGNC:11148]
1276	0.397553812	1.65E-195	pPSM-2	FAM159B	NA
1277	0.377223472	5.66E-195	pPSM-2	ATP6AP1L	ATPase H+ transporting accessory protein 1 like [Source:HGNC Symbol;Acc:HGNC:28091]
1278	0.320970136	7.19E-195	pPSM-2	PKM	pyruvate kinase M1/2 [Source:HGNC Symbol;Acc:HGNC:9021]
1279	0.358307714	4.92E-193	pPSM-2	SERPINE2	serpin family E member 2 [Source:HGNC Symbol;Acc:HGNC:8951]
1280	0.392032611	7.53E-193	pPSM-2	CRABP2	cellular retinoic acid binding protein 2 [Source:HGNC Symbol;Acc:HGNC:2339]
1281	0.284615992	1.59E-191	pPSM-2	PA2G4	proliferation-associated 2G4 [Source:HGNC Symbol;Acc:HGNC:8550]
1282	0.414914898	3.14E-191	pPSM-2	DYNLL2	dynein light chain LC8-type 2 [Source:HGNC Symbol;Acc:HGNC:24596]
1283	0.43211552	1.84E-190	pPSM-2	DACT1	dishevelled binding antagonist of beta catenin 1 [Source:HGNC Symbol;Acc:HGNC:17748]
1284	0.25328474	3.60E-189	pPSM-2	HIST1H2BL	histone cluster 1 H2B family member l [Source:HGNC Symbol;Acc:HGNC:4748]
1285	0.403931606	1.60E-188	pPSM-2	WNT5A	Wnt family member 5A [Source:HGNC Symbol;Acc:HGNC:12784]
1286	0.334584545	1.28E-187	pPSM-2	HIST4H4	histone cluster 4 H4 [Source:HGNC Symbol;Acc:HGNC:20510]
1287	0.337655538	5.72E-187	pPSM-2	LDHA	lactate dehydrogenase A [Source:HGNC Symbol;Acc:HGNC:6535]
1288	0.389293867	2.37E-185	pPSM-2	ENC1	ectodermal-neural cortex 1 [Source:HGNC Symbol;Acc:HGNC:3345]
1289	0.272934162	2.97E-185	pPSM-2	C1QBP	complement C1q binding protein [Source:HGNC Symbol;Acc:HGNC:1243]
1290	0.384295684	6.56E-185	pPSM-2	USB1	U6 snRNA biogenesis phosphodiesterase 1 [Source:HGNC Symbol;Acc:HGNC:25792]
1291	0.394932654	1.77E-184	pPSM-2	FRMD4A	FERM domain containing 4A [Source:HGNC Symbol;Acc:HGNC:25491]
1292	0.345955771	1.77E-184	pPSM-2	GLCE	glucuronic acid epimerase [Source:HGNC Symbol;Acc:HGNC:17855]
1293	0.432125795	6.35E-182	pPSM-2	SYT1	synaptotagmin 1 [Source:HGNC Symbol;Acc:HGNC:11509]
1294	0.358978787	2.88E-181	pPSM-2	TNIK	TRAF2 and NCK interacting kinase [Source:HGNC Symbol;Acc:HGNC:30765]
1295	0.280320823	6.43E-180	pPSM-2	PGAM1	phosphoglycerate mutase 1 [Source:HGNC Symbol;Acc:HGNC:8888]
1296	0.269645347	4.90E-177	pPSM-2	DENND2C	DENN domain containing 2C [Source:HGNC Symbol;Acc:HGNC:24748]
1297	0.353097876	2.45E-174	pPSM-2	CTSV	cathepsin V [Source:HGNC Symbol;Acc:HGNC:2538]
1298	0.348329244	1.64E-170	pPSM-2	ZNF814	zinc finger protein 814 [Source:HGNC Symbol;Acc:HGNC:33258]
1299	0.26387003	1.27E-168	pPSM-2	VDAC2	voltage dependent anion channel 2 [Source:HGNC Symbol;Acc:HGNC:12672]
1300	0.26575036	2.08E-168	pPSM-2	OLFM1	olfactomedin 1 [Source:HGNC Symbol;Acc:HGNC:17187]
1301	0.347340456	2.16E-166	pPSM-2	PRSS2	serine protease 2 [Source:HGNC Symbol;Acc:HGNC:9483]
1302	0.350517367	8.36E-165	pPSM-2	HOXB2	homeobox B2 [Source:HGNC Symbol;Acc:HGNC:5113]
1303	0.326686858	3.19E-164	pPSM-2	WWP1	WW domain containing E3 ubiquitin protein ligase 1 [Source:HGNC Symbol;Acc:HGNC:17004]
1304	0.362941711	1.30E-163	pPSM-2	PDLIM2	PDZ and LIM domain 2 [Source:HGNC Symbol;Acc:HGNC:13992]
1305	0.268011459	7.05E-163	pPSM-2	HNRNPAB	heterogeneous nuclear ribonucleoprotein A/B [Source:HGNC Symbol;Acc:HGNC:5034]
1306	0.426199824	7.44E-162	pPSM-2	FGF17	fibroblast growth factor 17 [Source:HGNC Symbol;Acc:HGNC:3673]
1307	0.356760812	1.86E-160	pPSM-2	RAP2B	RAP2B, member of RAS oncogene family [Source:HGNC Symbol;Acc:HGNC:9862]
1308	0.332939392	4.29E-160	pPSM-2	SELM	NA
1309	0.261691903	2.44E-156	pPSM-2	MIXL1	Mix paired-like homeobox [Source:HGNC Symbol;Acc:HGNC:13363]
1310	0.298254516	4.34E-154	pPSM-2	HIST1H2BJ	histone cluster 1 H2B family member j [Source:HGNC Symbol;Acc:HGNC:4761]
1311	0.317348156	2.45E-153	pPSM-2	CKB	creatine kinase B [Source:HGNC Symbol;Acc:HGNC:1991]
1312	0.260116181	7.50E-153	pPSM-2	PDIA6	protein disulfide isomerase family A member 6 [Source:HGNC Symbol;Acc:HGNC:30168]
1313	0.323522527	1.07E-151	pPSM-2	SH3D19	SH3 domain containing 19 [Source:HGNC Symbol;Acc:HGNC:30418]
1314	0.251995993	1.36E-151	pPSM-2	SLIRP	SRA stem-loop interacting RNA binding protein [Source:HGNC Symbol;Acc:HGNC:20495]
1315	0.280766831	6.73E-147	pPSM-2	ARPC2	actin related protein 2/3 complex subunit 2 [Source:HGNC Symbol;Acc:HGNC:705]
1316	0.314062533	8.93E-147	pPSM-2	HK1	hexokinase 1 [Source:HGNC Symbol;Acc:HGNC:4922]
1317	0.310038587	2.50E-146	pPSM-2	DMKN	dermokine [Source:HGNC Symbol;Acc:HGNC:25063]
1318	0.357575095	6.02E-145	pPSM-2	SP5	Sp5 transcription factor [Source:HGNC Symbol;Acc:HGNC:14529]
1319	0.284700752	3.26E-144	pPSM-2	HVCN1	hydrogen voltage gated channel 1 [Source:HGNC Symbol;Acc:HGNC:28240]
1320	0.289751402	1.44E-143	pPSM-2	DLC1	DLC1 Rho GTPase activating protein [Source:HGNC Symbol;Acc:HGNC:2897]
1321	0.297399646	3.68E-141	pPSM-2	B3GNT2	UDP-GlcNAc:betaGal beta-1,3-N-acetylglucosaminyltransferase 2 [Source:HGNC Symbol;Acc:HGNC:15629]
1322	0.323755831	4.19E-140	pPSM-2	FKBP4	FKBP prolyl isomerase 4 [Source:HGNC Symbol;Acc:HGNC:3720]
1323	0.297659562	1.16E-139	pPSM-2	TK1	thymidine kinase 1 [Source:HGNC Symbol;Acc:HGNC:11830]
1324	0.2540541	6.60E-138	pPSM-2	DNAJC7	DnaJ heat shock protein family (Hsp40) member C7 [Source:HGNC Symbol;Acc:HGNC:12392]
1325	0.254541699	1.01E-137	pPSM-2	UBE2L3	ubiquitin conjugating enzyme E2 L3 [Source:HGNC Symbol;Acc:HGNC:12488]
1326	0.322744191	9.38E-137	pPSM-2	GPAM	glycerol-3-phosphate acyltransferase, mitochondrial [Source:HGNC Symbol;Acc:HGNC:24865]
1327	0.450639644	1.18E-136	pPSM-2	IER3	immediate early response 3 [Source:HGNC Symbol;Acc:HGNC:5392]
1328	0.270066548	3.59E-136	pPSM-2	F2RL1	F2R like trypsin receptor 1 [Source:HGNC Symbol;Acc:HGNC:3538]
1329	0.267080135	3.01E-135	pPSM-2	SNAI2	snail family transcriptional repressor 2 [Source:HGNC Symbol;Acc:HGNC:11094]
1330	0.33209762	4.58E-135	pPSM-2	HSD17B7	hydroxysteroid 17-beta dehydrogenase 7 [Source:HGNC Symbol;Acc:HGNC:5215]
1331	0.290147813	1.52E-134	pPSM-2	ENPP1	ectonucleotide pyrophosphatase/phosphodiesterase 1 [Source:HGNC Symbol;Acc:HGNC:3356]
1332	0.337878251	2.27E-134	pPSM-2	WNT5B	Wnt family member 5B [Source:HGNC Symbol;Acc:HGNC:16265]
1333	0.305668929	1.77E-133	pPSM-2	DLL1	delta like canonical Notch ligand 1 [Source:HGNC Symbol;Acc:HGNC:2908]
1334	0.29827667	3.44E-131	pPSM-2	SHMT1	serine hydroxymethyltransferase 1 [Source:HGNC Symbol;Acc:HGNC:10850]
1335	0.402639214	1.23E-130	pPSM-2	IFT57	intraflagellar transport 57 [Source:HGNC Symbol;Acc:HGNC:17367]
1336	0.274444511	4.24E-129	pPSM-2	LIPG	lipase G, endothelial type [Source:HGNC Symbol;Acc:HGNC:6623]
1337	0.28922698	1.83E-128	pPSM-2	AKAP12	A-kinase anchoring protein 12 [Source:HGNC Symbol;Acc:HGNC:370]
1338	0.28625452	6.92E-128	pPSM-2	TUBB2A	tubulin beta 2A class IIa [Source:HGNC Symbol;Acc:HGNC:12412]
1339	0.292983513	1.17E-127	pPSM-2	GBX2	gastrulation brain homeobox 2 [Source:HGNC Symbol;Acc:HGNC:4186]
1340	0.282503046	1.58E-126	pPSM-2	TCF7	transcription factor 7 [Source:HGNC Symbol;Acc:HGNC:11639]
1341	0.323152382	2.57E-126	pPSM-2	IFITM3	interferon induced transmembrane protein 3 [Source:HGNC Symbol;Acc:HGNC:5414]
1342	0.279543655	2.48E-125	pPSM-2	NUDT9	nudix hydrolase 9 [Source:HGNC Symbol;Acc:HGNC:8056]
1343	0.25989808	2.82E-125	pPSM-2	MMP15	matrix metallopeptidase 15 [Source:HGNC Symbol;Acc:HGNC:7161]
1344	0.284524608	4.07E-125	pPSM-2	EPS8	epidermal growth factor receptor pathway substrate 8 [Source:HGNC Symbol;Acc:HGNC:3420]
1345	0.296966842	3.20E-124	pPSM-2	PLXNA2	plexin A2 [Source:HGNC Symbol;Acc:HGNC:9100]
1346	0.303989689	2.60E-123	pPSM-2	CDKN2AIPNL	CDKN2A interacting protein N-terminal like [Source:HGNC Symbol;Acc:HGNC:30545]
1347	0.25634994	2.15E-122	pPSM-2	BMP7	bone morphogenetic protein 7 [Source:HGNC Symbol;Acc:HGNC:1074]
1348	0.291960049	5.89E-122	pPSM-2	CCND1	cyclin D1 [Source:HGNC Symbol;Acc:HGNC:1582]
1349	0.338449787	4.13E-121	pPSM-2	LMO2	LIM domain only 2 [Source:HGNC Symbol;Acc:HGNC:6642]
1350	0.30088299	6.16E-121	pPSM-2	DYNC1LI1	dynein cytoplasmic 1 light intermediate chain 1 [Source:HGNC Symbol;Acc:HGNC:18745]
1351	0.279334146	1.43E-120	pPSM-2	MT-ND4L	mitochondrially encoded NADH:ubiquinone oxidoreductase core subunit 4L [Source:HGNC Symbol;Acc:HGNC:7460]
1352	0.271313151	1.60E-120	pPSM-2	PGRMC1	progesterone receptor membrane component 1 [Source:HGNC Symbol;Acc:HGNC:16090]
1353	0.262852214	4.54E-120	pPSM-2	GCHFR	GTP cyclohydrolase I feedback regulator [Source:HGNC Symbol;Acc:HGNC:4194]
1354	0.275379414	1.67E-118	pPSM-2	WFDC2	WAP four-disulfide core domain 2 [Source:HGNC Symbol;Acc:HGNC:15939]
1355	0.283025314	1.86E-118	pPSM-2	TTC29	tetratricopeptide repeat domain 29 [Source:HGNC Symbol;Acc:HGNC:29936]
1356	0.298475623	3.13E-118	pPSM-2	BTG2	BTG anti-proliferation factor 2 [Source:HGNC Symbol;Acc:HGNC:1131]
1357	0.274503006	1.62E-114	pPSM-2	CACHD1	cache domain containing 1 [Source:HGNC Symbol;Acc:HGNC:29314]
1358	0.260954821	2.42E-114	pPSM-2	SNRPN	small nuclear ribonucleoprotein polypeptide N [Source:HGNC Symbol;Acc:HGNC:11164]
1359	0.267879498	5.46E-114	pPSM-2	GNAI1	G protein subunit alpha i1 [Source:HGNC Symbol;Acc:HGNC:4384]
1360	0.354090978	1.11E-113	pPSM-2	FAM210B	family with sequence similarity 210 member B [Source:HGNC Symbol;Acc:HGNC:16102]
1361	0.256512632	1.49E-113	pPSM-2	CA2	carbonic anhydrase 2 [Source:HGNC Symbol;Acc:HGNC:1373]
1362	0.264909821	3.90E-110	pPSM-2	C8orf76	chromosome 8 open reading frame 76 [Source:HGNC Symbol;Acc:HGNC:25924]
1363	0.260965524	1.38E-109	pPSM-2	ZNF90	zinc finger protein 90 [Source:HGNC Symbol;Acc:HGNC:13165]
1364	0.293833107	6.88E-109	pPSM-2	STX3	syntaxin 3 [Source:HGNC Symbol;Acc:HGNC:11438]
1365	0.25697475	2.03E-107	pPSM-2	KAZN	kazrin, periplakin interacting protein [Source:HGNC Symbol;Acc:HGNC:29173]
1366	0.259140808	2.62E-106	pPSM-2	T	NA
1367	0.270087594	7.24E-106	pPSM-2	EBNA1BP2	EBNA1 binding protein 2 [Source:HGNC Symbol;Acc:HGNC:15531]
1368	0.320411599	1.28E-103	pPSM-2	MGST2	microsomal glutathione S-transferase 2 [Source:HGNC Symbol;Acc:HGNC:7063]
1369	0.279406023	5.46E-103	pPSM-2	YARS	tyrosyl-tRNA synthetase [Source:HGNC Symbol;Acc:HGNC:12840]
1370	0.313423664	1.26E-102	pPSM-2	BTG3	BTG anti-proliferation factor 3 [Source:HGNC Symbol;Acc:HGNC:1132]
1371	0.251042969	1.26E-102	pPSM-2	RCN1	reticulocalbin 1 [Source:HGNC Symbol;Acc:HGNC:9934]
1372	0.255288499	5.29E-102	pPSM-2	DDAH1	dimethylarginine dimethylaminohydrolase 1 [Source:HGNC Symbol;Acc:HGNC:2715]
1373	0.266656352	2.65E-101	pPSM-2	NTMT1	N-terminal Xaa-Pro-Lys N-methyltransferase 1 [Source:HGNC Symbol;Acc:HGNC:23373]
1374	0.257123698	6.43E-101	pPSM-2	C12orf75	chromosome 12 open reading frame 75 [Source:HGNC Symbol;Acc:HGNC:35164]
1375	0.258009973	1.19E-100	pPSM-2	ZWINT	ZW10 interacting kinetochore protein [Source:HGNC Symbol;Acc:HGNC:13195]
1376	0.269046267	8.30E-97	pPSM-2	EPHA4	EPH receptor A4 [Source:HGNC Symbol;Acc:HGNC:3388]
1377	0.269029786	8.44E-97	pPSM-2	FBXO5	F-box protein 5 [Source:HGNC Symbol;Acc:HGNC:13584]
1378	0.261439184	1.09E-94	pPSM-2	PTK7	protein tyrosine kinase 7 (inactive) [Source:HGNC Symbol;Acc:HGNC:9618]
1379	0.250075074	3.49E-94	pPSM-2	FKBP11	FKBP prolyl isomerase 11 [Source:HGNC Symbol;Acc:HGNC:18624]
1380	0.252053453	1.63E-91	pPSM-2	STXBP6	syntaxin binding protein 6 [Source:HGNC Symbol;Acc:HGNC:19666]
1381	0.252199609	1.32E-87	pPSM-2	HLA-C	major histocompatibility complex, class I, C [Source:HGNC Symbol;Acc:HGNC:4933]
1382	0.266374546	4.47E-86	pPSM-2	SFRP1	secreted frizzled related protein 1 [Source:HGNC Symbol;Acc:HGNC:10776]
1383	0.277957294	7.21E-86	pPSM-2	TNFRSF11B	TNF receptor superfamily member 11b [Source:HGNC Symbol;Acc:HGNC:11909]
1384	0.250748475	6.77E-83	pPSM-2	TACC2	transforming acidic coiled-coil containing protein 2 [Source:HGNC Symbol;Acc:HGNC:11523]
1385	0.256143529	3.41E-81	pPSM-2	MCM4	minichromosome maintenance complex component 4 [Source:HGNC Symbol;Acc:HGNC:6947]
1386	0.275475899	8.50E-81	pPSM-2	FJX1	four-jointed box kinase 1 [Source:HGNC Symbol;Acc:HGNC:17166]
1387	0.275815221	3.19E-64	pPSM-2	H1F0	H1 histone family member 0 [Source:HGNC Symbol;Acc:HGNC:4714]
1388	1.104589571	0	aPSM-1	HOXA-AS3	HOXA cluster antisense RNA 3 [Source:HGNC Symbol;Acc:HGNC:43748]
1389	0.906059736	0	aPSM-1	RNASE1	ribonuclease A family member 1, pancreatic [Source:HGNC Symbol;Acc:HGNC:10044]
1390	0.770057968	0	aPSM-1	MEST	mesoderm specific transcript [Source:HGNC Symbol;Acc:HGNC:7028]
1391	0.737861455	0	aPSM-1	SAT1	spermidine/spermine N1-acetyltransferase 1 [Source:HGNC Symbol;Acc:HGNC:10540]
1392	0.678003524	0	aPSM-1	GLUL	glutamate-ammonia ligase [Source:HGNC Symbol;Acc:HGNC:4341]
1393	0.661538412	0	aPSM-1	HOXB-AS3	HOXB cluster antisense RNA 3 [Source:HGNC Symbol;Acc:HGNC:40283]
1394	0.660863841	0	aPSM-1	URAD	ureidoimidazoline (2-oxo-4-hydroxy-4-carboxy-5-) decarboxylase [Source:HGNC Symbol;Acc:HGNC:17785]
1395	0.63846044	0	aPSM-1	C3orf52	chromosome 3 open reading frame 52 [Source:HGNC Symbol;Acc:HGNC:26255]
1396	0.620408711	0	aPSM-1	ARHGAP11B	Rho GTPase activating protein 11B [Source:HGNC Symbol;Acc:HGNC:15782]
1397	0.585203337	0	aPSM-1	CITED1	Cbp/p300 interacting transactivator with Glu/Asp rich carboxy-terminal domain 1 [Source:HGNC Symbol;Acc:HGNC:1986]
1398	0.58273496	0	aPSM-1	CDX1	caudal type homeobox 1 [Source:HGNC Symbol;Acc:HGNC:1805]
1399	0.575065761	0	aPSM-1	PRTG	protogenin [Source:HGNC Symbol;Acc:HGNC:26373]
1400	0.572014322	0	aPSM-1	FGF17	fibroblast growth factor 17 [Source:HGNC Symbol;Acc:HGNC:3673]
1401	0.568243165	0	aPSM-1	PCSK5	proprotein convertase subtilisin/kexin type 5 [Source:HGNC Symbol;Acc:HGNC:8747]
1402	0.559616392	0	aPSM-1	GTF3A	general transcription factor IIIA [Source:HGNC Symbol;Acc:HGNC:4662]
1403	0.547273915	0	aPSM-1	DLL3	delta like canonical Notch ligand 3 [Source:HGNC Symbol;Acc:HGNC:2909]
1404	0.525393675	0	aPSM-1	RBP1	retinol binding protein 1 [Source:HGNC Symbol;Acc:HGNC:9919]
1405	0.515155019	0	aPSM-1	BAALC	BAALC binder of MAP3K1 and KLF4 [Source:HGNC Symbol;Acc:HGNC:14333]
1406	0.504097575	0	aPSM-1	MME	membrane metalloendopeptidase [Source:HGNC Symbol;Acc:HGNC:7154]
1407	0.494861029	0	aPSM-1	FLJ12825	NA
1408	0.487414217	0	aPSM-1	LEF1	lymphoid enhancer binding factor 1 [Source:HGNC Symbol;Acc:HGNC:6551]
1409	0.482998791	0	aPSM-1	ABCG1	ATP binding cassette subfamily G member 1 [Source:HGNC Symbol;Acc:HGNC:73]
1410	0.482207894	0	aPSM-1	S1PR3	sphingosine-1-phosphate receptor 3 [Source:HGNC Symbol;Acc:HGNC:3167]
1411	0.48069295	0	aPSM-1	OTUD7A	OTU deubiquitinase 7A [Source:HGNC Symbol;Acc:HGNC:20718]
1412	0.455875834	0	aPSM-1	NOTUM	notum, palmitoleoyl-protein carboxylesterase [Source:HGNC Symbol;Acc:HGNC:27106]
1413	0.453238001	0	aPSM-1	MLEC	malectin [Source:HGNC Symbol;Acc:HGNC:28973]
1414	0.430492747	0	aPSM-1	ARPC2	actin related protein 2/3 complex subunit 2 [Source:HGNC Symbol;Acc:HGNC:705]
1415	0.399737211	0	aPSM-1	RP11-834C11.6	NA
1416	0.268910305	1.33E-297	aPSM-1	TMSB10	thymosin beta 10 [Source:HGNC Symbol;Acc:HGNC:11879]
1417	0.36089357	1.26E-295	aPSM-1	SLC8A3	solute carrier family 8 member A3 [Source:HGNC Symbol;Acc:HGNC:11070]
1418	0.469840437	1.54E-295	aPSM-1	C20orf27	chromosome 20 open reading frame 27 [Source:HGNC Symbol;Acc:HGNC:15873]
1419	0.4281665	5.98E-288	aPSM-1	RELL1	RELT like 1 [Source:HGNC Symbol;Acc:HGNC:27379]
1420	0.497209151	9.87E-285	aPSM-1	HOXB8	homeobox B8 [Source:HGNC Symbol;Acc:HGNC:5119]
1421	0.466017887	5.46E-281	aPSM-1	SLC1A5	solute carrier family 1 member 5 [Source:HGNC Symbol;Acc:HGNC:10943]
1422	0.492608801	9.25E-279	aPSM-1	DUSP6	dual specificity phosphatase 6 [Source:HGNC Symbol;Acc:HGNC:3072]
1423	0.508475421	9.07E-273	aPSM-1	SLC7A8	solute carrier family 7 member 8 [Source:HGNC Symbol;Acc:HGNC:11066]
1424	0.497902007	1.14E-271	aPSM-1	FGF8	fibroblast growth factor 8 [Source:HGNC Symbol;Acc:HGNC:3686]
1425	0.507789644	2.36E-271	aPSM-1	GREB1L	GREB1 like retinoic acid receptor coactivator [Source:HGNC Symbol;Acc:HGNC:31042]
1426	0.436930129	1.04E-268	aPSM-1	TMEM132C	transmembrane protein 132C [Source:HGNC Symbol;Acc:HGNC:25436]
1427	0.529919577	5.38E-264	aPSM-1	GLTP	glycolipid transfer protein [Source:HGNC Symbol;Acc:HGNC:24867]
1428	0.441766819	3.97E-261	aPSM-1	SKAP2	src kinase associated phosphoprotein 2 [Source:HGNC Symbol;Acc:HGNC:15687]
1429	0.517640336	6.36E-260	aPSM-1	PTCH1	patched 1 [Source:HGNC Symbol;Acc:HGNC:9585]
1430	0.427447956	1.12E-252	aPSM-1	RP11-82L7.4	NA
1431	0.339165646	2.37E-244	aPSM-1	MTPN	myotrophin [Source:HGNC Symbol;Acc:HGNC:15667]
1432	0.41003883	3.30E-243	aPSM-1	DEFA6	defensin alpha 6 [Source:HGNC Symbol;Acc:HGNC:2765]
1433	0.296941423	7.69E-243	aPSM-1	VIM	vimentin [Source:HGNC Symbol;Acc:HGNC:12692]
1434	0.469793998	3.16E-239	aPSM-1	NKD1	NKD inhibitor of WNT signaling pathway 1 [Source:HGNC Symbol;Acc:HGNC:17045]
1435	0.308738154	4.36E-229	aPSM-1	VWA2	von Willebrand factor A domain containing 2 [Source:HGNC Symbol;Acc:HGNC:24709]
1436	0.292242244	1.64E-226	aPSM-1	PTMS	parathymosin [Source:HGNC Symbol;Acc:HGNC:9629]
1437	0.437580268	1.45E-221	aPSM-1	STRA6	stimulated by retinoic acid 6 [Source:HGNC Symbol;Acc:HGNC:30650]
1438	0.381478743	9.20E-216	aPSM-1	SMC6	structural maintenance of chromosomes 6 [Source:HGNC Symbol;Acc:HGNC:20466]
1439	0.36554884	6.46E-213	aPSM-1	EGFLAM	EGF like, fibronectin type III and laminin G domains [Source:HGNC Symbol;Acc:HGNC:26810]
1440	0.403958923	1.17E-211	aPSM-1	PCBP4	poly(rC) binding protein 4 [Source:HGNC Symbol;Acc:HGNC:8652]
1441	0.362899616	3.08E-211	aPSM-1	DCXR	dicarbonyl and L-xylulose reductase [Source:HGNC Symbol;Acc:HGNC:18985]
1442	0.354457684	5.53E-211	aPSM-1	ABHD12B	abhydrolase domain containing 12B [Source:HGNC Symbol;Acc:HGNC:19837]
1443	0.341065754	8.35E-210	aPSM-1	FREM2	FRAS1 related extracellular matrix 2 [Source:HGNC Symbol;Acc:HGNC:25396]
1444	0.293313344	8.75E-210	aPSM-1	TPM3	tropomyosin 3 [Source:HGNC Symbol;Acc:HGNC:12012]
1445	0.416729347	1.55E-207	aPSM-1	MLLT3	MLLT3 super elongation complex subunit [Source:HGNC Symbol;Acc:HGNC:7136]
1446	0.492577787	1.53E-202	aPSM-1	NTS	neurotensin [Source:HGNC Symbol;Acc:HGNC:8038]
1447	0.416695664	8.72E-200	aPSM-1	HOXB4	homeobox B4 [Source:HGNC Symbol;Acc:HGNC:5115]
1448	0.4222457	8.43E-196	aPSM-1	PEG10	paternally expressed 10 [Source:HGNC Symbol;Acc:HGNC:14005]
1449	0.391934914	9.13E-196	aPSM-1	TBX6	T-box transcription factor 6 [Source:HGNC Symbol;Acc:HGNC:11605]
1450	0.311448898	1.02E-195	aPSM-1	FMN1	formin 1 [Source:HGNC Symbol;Acc:HGNC:3768]
1451	0.290109531	1.11E-193	aPSM-1	C18orf42	NA
1452	0.348111666	1.39E-189	aPSM-1	NID1	nidogen 1 [Source:HGNC Symbol;Acc:HGNC:7821]
1453	0.365375796	8.76E-187	aPSM-1	RSPO3	R-spondin 3 [Source:HGNC Symbol;Acc:HGNC:20866]
1454	0.405660857	5.13E-186	aPSM-1	ASS1	argininosuccinate synthase 1 [Source:HGNC Symbol;Acc:HGNC:758]
1455	0.372282383	2.47E-185	aPSM-1	HAS2	hyaluronan synthase 2 [Source:HGNC Symbol;Acc:HGNC:4819]
1456	0.314648049	3.87E-180	aPSM-1	FGF9	fibroblast growth factor 9 [Source:HGNC Symbol;Acc:HGNC:3687]
1457	0.34875803	1.03E-176	aPSM-1	SEMA4D	semaphorin 4D [Source:HGNC Symbol;Acc:HGNC:10732]
1458	0.272091141	2.99E-176	aPSM-1	RP11-844P9.2	NA
1459	0.304992608	1.04E-172	aPSM-1	CHRNA3	cholinergic receptor nicotinic alpha 3 subunit [Source:HGNC Symbol;Acc:HGNC:1957]
1460	0.341903449	3.42E-171	aPSM-1	GPC3	glypican 3 [Source:HGNC Symbol;Acc:HGNC:4451]
1461	0.358402129	6.19E-170	aPSM-1	NDFIP2	Nedd4 family interacting protein 2 [Source:HGNC Symbol;Acc:HGNC:18537]
1462	0.290149532	1.84E-167	aPSM-1	COTL1	coactosin like F-actin binding protein 1 [Source:HGNC Symbol;Acc:HGNC:18304]
1463	0.327097284	1.30E-164	aPSM-1	NCAM1	neural cell adhesion molecule 1 [Source:HGNC Symbol;Acc:HGNC:7656]
1464	0.316044978	3.68E-163	aPSM-1	ST6GALNAC3	ST6 N-acetylgalactosaminide alpha-2,6-sialyltransferase 3 [Source:HGNC Symbol;Acc:HGNC:19343]
1465	0.406185086	1.35E-161	aPSM-1	HES7	hes family bHLH transcription factor 7 [Source:HGNC Symbol;Acc:HGNC:15977]
1466	0.373016336	4.02E-161	aPSM-1	IL17RD	interleukin 17 receptor D [Source:HGNC Symbol;Acc:HGNC:17616]
1467	0.357578731	7.32E-161	aPSM-1	FAM98A	family with sequence similarity 98 member A [Source:HGNC Symbol;Acc:HGNC:24520]
1468	0.353330626	1.89E-159	aPSM-1	TCHP	trichoplein keratin filament binding [Source:HGNC Symbol;Acc:HGNC:28135]
1469	0.367041467	2.12E-158	aPSM-1	DSG2	desmoglein 2 [Source:HGNC Symbol;Acc:HGNC:3049]
1470	0.338087429	1.61E-155	aPSM-1	HOXB1	homeobox B1 [Source:HGNC Symbol;Acc:HGNC:5111]
1471	0.259710844	8.26E-153	aPSM-1	KTN1	kinectin 1 [Source:HGNC Symbol;Acc:HGNC:6467]
1472	0.333549662	9.69E-152	aPSM-1	ROCK2	Rho associated coiled-coil containing protein kinase 2 [Source:HGNC Symbol;Acc:HGNC:10252]
1473	0.309131524	2.23E-150	aPSM-1	SEC24C	SEC24 homolog C, COPII coat complex component [Source:HGNC Symbol;Acc:HGNC:10705]
1474	0.263723159	4.98E-146	aPSM-1	CDV3	CDV3 homolog [Source:HGNC Symbol;Acc:HGNC:26928]
1475	0.299623369	9.30E-146	aPSM-1	IFT57	intraflagellar transport 57 [Source:HGNC Symbol;Acc:HGNC:17367]
1476	0.311057807	9.42E-146	aPSM-1	COLEC12	collectin subfamily member 12 [Source:HGNC Symbol;Acc:HGNC:16016]
1477	0.347659248	2.62E-145	aPSM-1	HOXB3	homeobox B3 [Source:HGNC Symbol;Acc:HGNC:5114]
1478	0.271730127	1.35E-142	aPSM-1	PCDH19	protocadherin 19 [Source:HGNC Symbol;Acc:HGNC:14270]
1479	0.31098887	5.75E-142	aPSM-1	ETV5	ETS variant 5 [Source:HGNC Symbol;Acc:HGNC:3494]
1480	0.355804436	1.80E-141	aPSM-1	SCRN1	secernin 1 [Source:HGNC Symbol;Acc:HGNC:22192]
1481	0.36281447	1.41E-139	aPSM-1	WWC2	WW and C2 domain containing 2 [Source:HGNC Symbol;Acc:HGNC:24148]
1482	0.34578827	5.48E-139	aPSM-1	CXCR4	C-X-C motif chemokine receptor 4 [Source:HGNC Symbol;Acc:HGNC:2561]
1483	0.322699383	3.57E-138	aPSM-1	TTC29	tetratricopeptide repeat domain 29 [Source:HGNC Symbol;Acc:HGNC:29936]
1484	0.266447655	1.45E-137	aPSM-1	S100A13	S100 calcium binding protein A13 [Source:HGNC Symbol;Acc:HGNC:10490]
1485	0.28994529	1.54E-134	aPSM-1	HOXA3	homeobox A3 [Source:HGNC Symbol;Acc:HGNC:5104]
1486	0.343376904	1.73E-131	aPSM-1	PALLD	palladin, cytoskeletal associated protein [Source:HGNC Symbol;Acc:HGNC:17068]
1487	0.251487888	6.43E-131	aPSM-1	CNBD2	cyclic nucleotide binding domain containing 2 [Source:HGNC Symbol;Acc:HGNC:16145]
1488	0.325124639	1.26E-130	aPSM-1	RND3	Rho family GTPase 3 [Source:HGNC Symbol;Acc:HGNC:671]
1489	0.338234801	1.27E-127	aPSM-1	PLS3	plastin 3 [Source:HGNC Symbol;Acc:HGNC:9091]
1490	0.301805491	2.80E-126	aPSM-1	ENPP2	ectonucleotide pyrophosphatase/phosphodiesterase 2 [Source:HGNC Symbol;Acc:HGNC:3357]
1491	0.25356186	2.88E-125	aPSM-1	S100A6	S100 calcium binding protein A6 [Source:HGNC Symbol;Acc:HGNC:10496]
1492	0.318209664	3.91E-125	aPSM-1	ATP1A1	ATPase Na+/K+ transporting subunit alpha 1 [Source:HGNC Symbol;Acc:HGNC:799]
1493	0.280475481	1.61E-123	aPSM-1	TIMM50	translocase of inner mitochondrial membrane 50 [Source:HGNC Symbol;Acc:HGNC:23656]
1494	0.256892173	1.58E-122	aPSM-1	RALGPS2	Ral GEF with PH domain and SH3 binding motif 2 [Source:HGNC Symbol;Acc:HGNC:30279]
1495	0.299945463	7.04E-122	aPSM-1	HOTAIRM1	HOXA transcript antisense RNA, myeloid-specific 1 [Source:HGNC Symbol;Acc:HGNC:37117]
1496	0.348946706	1.34E-121	aPSM-1	PPFIBP1	PPFIA binding protein 1 [Source:HGNC Symbol;Acc:HGNC:9249]
1497	0.275278063	5.31E-120	aPSM-1	PRSS23	serine protease 23 [Source:HGNC Symbol;Acc:HGNC:14370]
1498	0.293143336	2.50E-117	aPSM-1	MAGI1	membrane associated guanylate kinase, WW and PDZ domain containing 1 [Source:HGNC Symbol;Acc:HGNC:946]
1499	0.250687196	1.34E-113	aPSM-1	E2F8	E2F transcription factor 8 [Source:HGNC Symbol;Acc:HGNC:24727]
1500	0.38042055	9.48E-112	aPSM-1	CTHRC1	collagen triple helix repeat containing 1 [Source:HGNC Symbol;Acc:HGNC:18831]
1501	0.316218705	8.00E-111	aPSM-1	ASPSCR1	ASPSCR1 tether for SLC2A4, UBX domain containing [Source:HGNC Symbol;Acc:HGNC:13825]
1502	0.300052766	2.73E-110	aPSM-1	SLC5A3	solute carrier family 5 member 3 [Source:HGNC Symbol;Acc:HGNC:11038]
1503	0.278295554	7.07E-110	aPSM-1	EXOC6B	exocyst complex component 6B [Source:HGNC Symbol;Acc:HGNC:17085]
1504	0.257793629	3.07E-109	aPSM-1	9-Sep	NA
1505	0.328010614	7.01E-107	aPSM-1	SACS	sacsin molecular chaperone [Source:HGNC Symbol;Acc:HGNC:10519]
1506	0.262815619	6.42E-104	aPSM-1	CDH11	cadherin 11 [Source:HGNC Symbol;Acc:HGNC:1750]
1507	0.339074193	7.21E-101	aPSM-1	FOXB1	forkhead box B1 [Source:HGNC Symbol;Acc:HGNC:3799]
1508	0.281042529	4.21E-99	aPSM-1	HMGCR	3-hydroxy-3-methylglutaryl-CoA reductase [Source:HGNC Symbol;Acc:HGNC:5006]
1509	0.304708767	3.81E-98	aPSM-1	RNF24	ring finger protein 24 [Source:HGNC Symbol;Acc:HGNC:13779]
1510	0.265299061	1.21E-97	aPSM-1	DCBLD1	discoidin, CUB and LCCL domain containing 1 [Source:HGNC Symbol;Acc:HGNC:21479]
1511	0.261621143	1.39E-94	aPSM-1	PYGL	glycogen phosphorylase L [Source:HGNC Symbol;Acc:HGNC:9725]
1512	0.26280369	2.76E-93	aPSM-1	MTIF3	mitochondrial translational initiation factor 3 [Source:HGNC Symbol;Acc:HGNC:29788]
1513	0.255101473	9.27E-93	aPSM-1	SV2A	synaptic vesicle glycoprotein 2A [Source:HGNC Symbol;Acc:HGNC:20566]
1514	0.266656137	4.46E-85	aPSM-1	PIK3R1	phosphoinositide-3-kinase regulatory subunit 1 [Source:HGNC Symbol;Acc:HGNC:8979]
1515	0.316775863	7.96E-84	aPSM-1	MT1X	metallothionein 1X [Source:HGNC Symbol;Acc:HGNC:7405]
1516	0.253700024	1.00E-83	aPSM-1	ACSS3	acyl-CoA synthetase short chain family member 3 [Source:HGNC Symbol;Acc:HGNC:24723]
1517	0.269248073	6.64E-79	aPSM-1	PTEN	phosphatase and tensin homolog [Source:HGNC Symbol;Acc:HGNC:9588]
1518	0.262247414	3.52E-66	aPSM-1	IGFBP4	insulin like growth factor binding protein 4 [Source:HGNC Symbol;Acc:HGNC:5473]
1519	0.252774087	3.21E-63	aPSM-1	PRCP	prolylcarboxypeptidase [Source:HGNC Symbol;Acc:HGNC:9344]
1520	0.252045491	9.03E-52	aPSM-1	CDX4	caudal type homeobox 4 [Source:HGNC Symbol;Acc:HGNC:1808]
1521	2.623016428	0	aPSM-2	DEFA5	defensin alpha 5 [Source:HGNC Symbol;Acc:HGNC:2764]
1522	1.750516545	0	aPSM-2	DEFA6	defensin alpha 6 [Source:HGNC Symbol;Acc:HGNC:2765]
1523	1.227888999	0	aPSM-2	SAT1	spermidine/spermine N1-acetyltransferase 1 [Source:HGNC Symbol;Acc:HGNC:10540]
1524	0.969567826	0	aPSM-2	RNASE1	ribonuclease A family member 1, pancreatic [Source:HGNC Symbol;Acc:HGNC:10044]
1525	0.745808313	0	aPSM-2	RP11-82L7.4	NA
1526	0.577600187	0	aPSM-2	RBP1	retinol binding protein 1 [Source:HGNC Symbol;Acc:HGNC:9919]
1527	0.519194288	0	aPSM-2	TRDC	T cell receptor delta constant [Source:HGNC Symbol;Acc:HGNC:12253]
1528	0.467833087	0	aPSM-2	ZAP70	zeta chain of T cell receptor associated protein kinase 70 [Source:HGNC Symbol;Acc:HGNC:12858]
1529	0.747554466	2.36E-301	aPSM-2	MEST	mesoderm specific transcript [Source:HGNC Symbol;Acc:HGNC:7028]
1530	0.352415484	7.59E-277	aPSM-2	GABRA2	gamma-aminobutyric acid type A receptor alpha2 subunit [Source:HGNC Symbol;Acc:HGNC:4076]
1531	0.506311416	5.82E-258	aPSM-2	FREM2	FRAS1 related extracellular matrix 2 [Source:HGNC Symbol;Acc:HGNC:25396]
1532	0.519523432	4.11E-257	aPSM-2	ARPC2	actin related protein 2/3 complex subunit 2 [Source:HGNC Symbol;Acc:HGNC:705]
1533	0.592474926	1.03E-254	aPSM-2	C3orf52	chromosome 3 open reading frame 52 [Source:HGNC Symbol;Acc:HGNC:26255]
1534	0.429560797	1.79E-245	aPSM-2	MUCL1	mucin like 1 [Source:HGNC Symbol;Acc:HGNC:30588]
1535	0.682970435	5.98E-241	aPSM-2	NKD1	NKD inhibitor of WNT signaling pathway 1 [Source:HGNC Symbol;Acc:HGNC:17045]
1536	0.544942492	1.50E-237	aPSM-2	NOTUM	notum, palmitoleoyl-protein carboxylesterase [Source:HGNC Symbol;Acc:HGNC:27106]
1537	0.618326511	3.64E-237	aPSM-2	PRTG	protogenin [Source:HGNC Symbol;Acc:HGNC:26373]
1538	0.611070289	8.45E-231	aPSM-2	GLUL	glutamate-ammonia ligase [Source:HGNC Symbol;Acc:HGNC:4341]
1539	0.549159914	8.41E-228	aPSM-2	FLJ12825	NA
1540	0.49972357	2.02E-225	aPSM-2	SMOC2	SPARC related modular calcium binding 2 [Source:HGNC Symbol;Acc:HGNC:20323]
1541	0.578194367	1.39E-223	aPSM-2	PCSK5	proprotein convertase subtilisin/kexin type 5 [Source:HGNC Symbol;Acc:HGNC:8747]
1542	0.535135	1.75E-223	aPSM-2	MLEC	malectin [Source:HGNC Symbol;Acc:HGNC:28973]
1543	0.500769797	1.55E-217	aPSM-2	ABHD12B	abhydrolase domain containing 12B [Source:HGNC Symbol;Acc:HGNC:19837]
1544	0.497195854	1.07E-214	aPSM-2	EGFLAM	EGF like, fibronectin type III and laminin G domains [Source:HGNC Symbol;Acc:HGNC:26810]
1545	0.587341735	1.61E-213	aPSM-2	HOXB4	homeobox B4 [Source:HGNC Symbol;Acc:HGNC:5115]
1546	0.459793265	7.82E-199	aPSM-2	FGF20	fibroblast growth factor 20 [Source:HGNC Symbol;Acc:HGNC:3677]
1547	0.420365733	1.22E-196	aPSM-2	C18orf42	NA
1548	0.532058206	8.40E-196	aPSM-2	BAALC	BAALC binder of MAP3K1 and KLF4 [Source:HGNC Symbol;Acc:HGNC:14333]
1549	0.474875951	1.09E-193	aPSM-2	RELL1	RELT like 1 [Source:HGNC Symbol;Acc:HGNC:27379]
1550	0.470822419	1.63E-193	aPSM-2	TMEM132C	transmembrane protein 132C [Source:HGNC Symbol;Acc:HGNC:25436]
1551	0.546425886	2.14E-193	aPSM-2	SLC1A5	solute carrier family 1 member 5 [Source:HGNC Symbol;Acc:HGNC:10943]
1552	0.396650851	2.39E-188	aPSM-2	OTUD7A	OTU deubiquitinase 7A [Source:HGNC Symbol;Acc:HGNC:20718]
1553	0.501928151	1.13E-186	aPSM-2	MME	membrane metalloendopeptidase [Source:HGNC Symbol;Acc:HGNC:7154]
1554	0.500951891	3.62E-186	aPSM-2	S1PR3	sphingosine-1-phosphate receptor 3 [Source:HGNC Symbol;Acc:HGNC:3167]
1555	0.557350022	1.44E-184	aPSM-2	HOXA-AS3	HOXA cluster antisense RNA 3 [Source:HGNC Symbol;Acc:HGNC:43748]
1556	0.458200136	2.85E-184	aPSM-2	ABCG1	ATP binding cassette subfamily G member 1 [Source:HGNC Symbol;Acc:HGNC:73]
1557	0.450192316	2.21E-183	aPSM-2	GTF3A	general transcription factor IIIA [Source:HGNC Symbol;Acc:HGNC:4662]
1558	0.571325931	2.21E-181	aPSM-2	SLC7A8	solute carrier family 7 member 8 [Source:HGNC Symbol;Acc:HGNC:11066]
1559	0.594730605	3.01E-181	aPSM-2	CLDN11	claudin 11 [Source:HGNC Symbol;Acc:HGNC:8514]
1560	0.280704405	2.58E-174	aPSM-2	TMSB10	thymosin beta 10 [Source:HGNC Symbol;Acc:HGNC:11879]
1561	0.586531502	5.32E-173	aPSM-2	PTCH1	patched 1 [Source:HGNC Symbol;Acc:HGNC:9585]
1562	0.568308466	2.06E-171	aPSM-2	URAD	ureidoimidazoline (2-oxo-4-hydroxy-4-carboxy-5-) decarboxylase [Source:HGNC Symbol;Acc:HGNC:17785]
1563	0.266463348	4.59E-171	aPSM-2	GNAS	GNAS complex locus [Source:HGNC Symbol;Acc:HGNC:4392]
1564	0.415894779	6.61E-170	aPSM-2	FMN1	formin 1 [Source:HGNC Symbol;Acc:HGNC:3768]
1565	0.350104506	7.19E-168	aPSM-2	RP11-834C11.6	NA
1566	0.579511442	1.68E-167	aPSM-2	ASS1	argininosuccinate synthase 1 [Source:HGNC Symbol;Acc:HGNC:758]
1567	0.353589353	3.41E-167	aPSM-2	RP11-844P9.2	NA
1568	0.49563731	4.61E-167	aPSM-2	LEF1	lymphoid enhancer binding factor 1 [Source:HGNC Symbol;Acc:HGNC:6551]
1569	0.480229579	1.39E-166	aPSM-2	CDX1	caudal type homeobox 1 [Source:HGNC Symbol;Acc:HGNC:1805]
1570	0.361625855	7.16E-166	aPSM-2	VIM	vimentin [Source:HGNC Symbol;Acc:HGNC:12692]
1571	0.371146516	2.62E-165	aPSM-2	VWA2	von Willebrand factor A domain containing 2 [Source:HGNC Symbol;Acc:HGNC:24709]
1572	0.550054784	1.50E-158	aPSM-2	ARHGAP11B	Rho GTPase activating protein 11B [Source:HGNC Symbol;Acc:HGNC:15782]
1573	0.251022802	2.56E-154	aPSM-2	ATP5E	NA
1574	0.413090304	5.88E-150	aPSM-2	COTL1	coactosin like F-actin binding protein 1 [Source:HGNC Symbol;Acc:HGNC:18304]
1575	0.473188101	6.98E-145	aPSM-2	HOXB3	homeobox B3 [Source:HGNC Symbol;Acc:HGNC:5114]
1576	0.363004308	2.23E-143	aPSM-2	AFAP1L2	actin filament associated protein 1 like 2 [Source:HGNC Symbol;Acc:HGNC:25901]
1577	0.376618424	2.90E-142	aPSM-2	E2F8	E2F transcription factor 8 [Source:HGNC Symbol;Acc:HGNC:24727]
1578	0.329390832	3.54E-141	aPSM-2	PARP1	poly(ADP-ribose) polymerase 1 [Source:HGNC Symbol;Acc:HGNC:270]
1579	0.491007625	1.07E-138	aPSM-2	DLL3	delta like canonical Notch ligand 3 [Source:HGNC Symbol;Acc:HGNC:2909]
1580	0.492938036	2.38E-138	aPSM-2	RND3	Rho family GTPase 3 [Source:HGNC Symbol;Acc:HGNC:671]
1581	0.469007063	2.22E-133	aPSM-2	TBX6	T-box transcription factor 6 [Source:HGNC Symbol;Acc:HGNC:11605]
1582	0.437407653	3.25E-132	aPSM-2	COLEC12	collectin subfamily member 12 [Source:HGNC Symbol;Acc:HGNC:16016]
1583	0.488612657	3.82E-132	aPSM-2	CTSZ	cathepsin Z [Source:HGNC Symbol;Acc:HGNC:2547]
1584	0.357929287	4.11E-131	aPSM-2	PVRL1	NA
1585	0.520822171	4.44E-130	aPSM-2	HES7	hes family bHLH transcription factor 7 [Source:HGNC Symbol;Acc:HGNC:15977]
1586	0.372099615	8.87E-130	aPSM-2	FILIP1L	filamin A interacting protein 1 like [Source:HGNC Symbol;Acc:HGNC:24589]
1587	0.432302369	4.20E-128	aPSM-2	PCBP4	poly(rC) binding protein 4 [Source:HGNC Symbol;Acc:HGNC:8652]
1588	0.426404778	7.12E-128	aPSM-2	NDFIP2	Nedd4 family interacting protein 2 [Source:HGNC Symbol;Acc:HGNC:18537]
1589	0.448988769	4.71E-125	aPSM-2	FOXB1	forkhead box B1 [Source:HGNC Symbol;Acc:HGNC:3799]
1590	0.270470832	4.21E-121	aPSM-2	XXbac-BPG32J3.19	NA
1591	0.328903478	7.10E-120	aPSM-2	MTPN	myotrophin [Source:HGNC Symbol;Acc:HGNC:15667]
1592	0.440896824	1.28E-118	aPSM-2	PROX1	prospero homeobox 1 [Source:HGNC Symbol;Acc:HGNC:9459]
1593	0.467037868	2.54E-116	aPSM-2	HOXB-AS3	HOXB cluster antisense RNA 3 [Source:HGNC Symbol;Acc:HGNC:40283]
1594	0.466971025	1.23E-115	aPSM-2	BMP4	bone morphogenetic protein 4 [Source:HGNC Symbol;Acc:HGNC:1071]
1595	0.32298079	1.42E-114	aPSM-2	FAM219A	family with sequence similarity 219 member A [Source:HGNC Symbol;Acc:HGNC:19920]
1596	0.275795437	4.25E-113	aPSM-2	PTMS	parathymosin [Source:HGNC Symbol;Acc:HGNC:9629]
1597	0.346327317	3.21E-112	aPSM-2	LINGO1	leucine rich repeat and Ig domain containing 1 [Source:HGNC Symbol;Acc:HGNC:21205]
1598	0.357142994	4.78E-112	aPSM-2	ST6GALNAC3	ST6 N-acetylgalactosaminide alpha-2,6-sialyltransferase 3 [Source:HGNC Symbol;Acc:HGNC:19343]
1599	0.279327022	2.01E-111	aPSM-2	MRPS6	mitochondrial ribosomal protein S6 [Source:HGNC Symbol;Acc:HGNC:14051]
1600	0.294731578	7.21E-109	aPSM-2	TPM3	tropomyosin 3 [Source:HGNC Symbol;Acc:HGNC:12012]
1601	0.411344481	8.00E-108	aPSM-2	FAM98A	family with sequence similarity 98 member A [Source:HGNC Symbol;Acc:HGNC:24520]
1602	0.380819739	3.76E-106	aPSM-2	MAGI1	membrane associated guanylate kinase, WW and PDZ domain containing 1 [Source:HGNC Symbol;Acc:HGNC:946]
1603	0.399433442	4.03E-106	aPSM-2	CCDC109B	NA
1604	0.40539809	4.42E-106	aPSM-2	TTC29	tetratricopeptide repeat domain 29 [Source:HGNC Symbol;Acc:HGNC:29936]
1605	0.390969933	1.78E-103	aPSM-2	ASPSCR1	ASPSCR1 tether for SLC2A4, UBX domain containing [Source:HGNC Symbol;Acc:HGNC:13825]
1606	0.336377009	1.25E-102	aPSM-2	CYP1B1	cytochrome P450 family 1 subfamily B member 1 [Source:HGNC Symbol;Acc:HGNC:2597]
1607	0.417135164	7.97E-102	aPSM-2	ATP1A1	ATPase Na+/K+ transporting subunit alpha 1 [Source:HGNC Symbol;Acc:HGNC:799]
1608	0.344899883	1.58E-100	aPSM-2	S100A6	S100 calcium binding protein A6 [Source:HGNC Symbol;Acc:HGNC:10496]
1609	0.362724818	4.96E-100	aPSM-2	DSP	desmoplakin [Source:HGNC Symbol;Acc:HGNC:3052]
1610	0.356718076	7.83E-100	aPSM-2	NCAM1	neural cell adhesion molecule 1 [Source:HGNC Symbol;Acc:HGNC:7656]
1611	0.337329121	3.29E-96	aPSM-2	CST6	cystatin E/M [Source:HGNC Symbol;Acc:HGNC:2478]
1612	0.428963042	1.94E-95	aPSM-2	PEG10	paternally expressed 10 [Source:HGNC Symbol;Acc:HGNC:14005]
1613	0.315083707	3.42E-94	aPSM-2	FBLN1	fibulin 1 [Source:HGNC Symbol;Acc:HGNC:3600]
1614	0.258003474	1.68E-93	aPSM-2	PDP1	pyruvate dehyrogenase phosphatase catalytic subunit 1 [Source:HGNC Symbol;Acc:HGNC:9279]
1615	0.421583577	3.63E-93	aPSM-2	LGALS1	galectin 1 [Source:HGNC Symbol;Acc:HGNC:6561]
1616	0.337973488	4.48E-93	aPSM-2	ADA	adenosine deaminase [Source:HGNC Symbol;Acc:HGNC:186]
1617	0.35473718	9.10E-93	aPSM-2	MLLT3	MLLT3 super elongation complex subunit [Source:HGNC Symbol;Acc:HGNC:7136]
1618	0.275520753	2.62E-92	aPSM-2	SCAND1	SCAN domain containing 1 [Source:HGNC Symbol;Acc:HGNC:10566]
1619	0.350348049	3.44E-91	aPSM-2	HAS2	hyaluronan synthase 2 [Source:HGNC Symbol;Acc:HGNC:4819]
1620	0.365860046	1.93E-90	aPSM-2	TTN	titin [Source:HGNC Symbol;Acc:HGNC:12403]
1621	0.313162223	4.83E-89	aPSM-2	DCXR	dicarbonyl and L-xylulose reductase [Source:HGNC Symbol;Acc:HGNC:18985]
1622	0.330927682	1.04E-87	aPSM-2	RALGPS2	Ral GEF with PH domain and SH3 binding motif 2 [Source:HGNC Symbol;Acc:HGNC:30279]
1623	0.359900671	1.59E-87	aPSM-2	STRA6	stimulated by retinoic acid 6 [Source:HGNC Symbol;Acc:HGNC:30650]
1624	0.300173515	4.12E-87	aPSM-2	RASGRP3	RAS guanyl releasing protein 3 [Source:HGNC Symbol;Acc:HGNC:14545]
1625	0.356409658	4.80E-87	aPSM-2	SV2A	synaptic vesicle glycoprotein 2A [Source:HGNC Symbol;Acc:HGNC:20566]
1626	0.362834982	4.27E-86	aPSM-2	PLS3	plastin 3 [Source:HGNC Symbol;Acc:HGNC:9091]
1627	0.357265909	6.80E-86	aPSM-2	VAMP5	vesicle associated membrane protein 5 [Source:HGNC Symbol;Acc:HGNC:12646]
1628	0.321411978	9.93E-86	aPSM-2	ETV5	ETS variant 5 [Source:HGNC Symbol;Acc:HGNC:3494]
1629	0.394917214	1.44E-85	aPSM-2	GLTP	glycolipid transfer protein [Source:HGNC Symbol;Acc:HGNC:24867]
1630	0.414659895	3.98E-85	aPSM-2	PPFIBP1	PPFIA binding protein 1 [Source:HGNC Symbol;Acc:HGNC:9249]
1631	0.263116637	4.94E-85	aPSM-2	RCN2	reticulocalbin 2 [Source:HGNC Symbol;Acc:HGNC:9935]
1632	0.293723504	2.18E-84	aPSM-2	CHRNA3	cholinergic receptor nicotinic alpha 3 subunit [Source:HGNC Symbol;Acc:HGNC:1957]
1633	0.285317961	2.59E-83	aPSM-2	S100A13	S100 calcium binding protein A13 [Source:HGNC Symbol;Acc:HGNC:10490]
1634	0.339839178	1.03E-82	aPSM-2	ACSS3	acyl-CoA synthetase short chain family member 3 [Source:HGNC Symbol;Acc:HGNC:24723]
1635	0.327577409	1.36E-82	aPSM-2	MGST2	microsomal glutathione S-transferase 2 [Source:HGNC Symbol;Acc:HGNC:7063]
1636	0.308260654	4.41E-82	aPSM-2	CD99	CD99 molecule (Xg blood group) [Source:HGNC Symbol;Acc:HGNC:7082]
1637	0.354771898	1.28E-81	aPSM-2	ROCK2	Rho associated coiled-coil containing protein kinase 2 [Source:HGNC Symbol;Acc:HGNC:10252]
1638	0.297790738	1.97E-80	aPSM-2	SEC24C	SEC24 homolog C, COPII coat complex component [Source:HGNC Symbol;Acc:HGNC:10705]
1639	0.263010906	4.90E-80	aPSM-2	KTN1	kinectin 1 [Source:HGNC Symbol;Acc:HGNC:6467]
1640	0.310850005	7.21E-78	aPSM-2	TMEM178A	transmembrane protein 178A [Source:HGNC Symbol;Acc:HGNC:28517]
1641	0.298713903	5.08E-77	aPSM-2	RORA	RAR related orphan receptor A [Source:HGNC Symbol;Acc:HGNC:10258]
1642	0.317909003	2.48E-76	aPSM-2	TMEM123	transmembrane protein 123 [Source:HGNC Symbol;Acc:HGNC:30138]
1643	0.30807267	1.12E-75	aPSM-2	C18orf54	chromosome 18 open reading frame 54 [Source:HGNC Symbol;Acc:HGNC:13796]
1644	0.32427575	4.90E-75	aPSM-2	RAP2B	RAP2B, member of RAS oncogene family [Source:HGNC Symbol;Acc:HGNC:9862]
1645	0.303331962	1.43E-74	aPSM-2	DCBLD1	discoidin, CUB and LCCL domain containing 1 [Source:HGNC Symbol;Acc:HGNC:21479]
1646	0.327109999	1.04E-72	aPSM-2	DUSP6	dual specificity phosphatase 6 [Source:HGNC Symbol;Acc:HGNC:3072]
1647	0.317016976	2.94E-72	aPSM-2	APCDD1	APC down-regulated 1 [Source:HGNC Symbol;Acc:HGNC:15718]
1648	0.287857471	3.67E-72	aPSM-2	EXOC6B	exocyst complex component 6B [Source:HGNC Symbol;Acc:HGNC:17085]
1649	0.309141676	3.20E-71	aPSM-2	ARID3A	AT-rich interaction domain 3A [Source:HGNC Symbol;Acc:HGNC:3031]
1650	0.324271203	3.08E-70	aPSM-2	CXCR4	C-X-C motif chemokine receptor 4 [Source:HGNC Symbol;Acc:HGNC:2561]
1651	0.348946113	5.66E-70	aPSM-2	PIK3R1	phosphoinositide-3-kinase regulatory subunit 1 [Source:HGNC Symbol;Acc:HGNC:8979]
1652	0.254052475	6.63E-70	aPSM-2	COL1A2	collagen type I alpha 2 chain [Source:HGNC Symbol;Acc:HGNC:2198]
1653	0.289739779	1.25E-69	aPSM-2	SEMA4D	semaphorin 4D [Source:HGNC Symbol;Acc:HGNC:10732]
1654	0.274926893	2.74E-69	aPSM-2	IL13RA1	interleukin 13 receptor subunit alpha 1 [Source:HGNC Symbol;Acc:HGNC:5974]
1655	0.304091144	1.12E-68	aPSM-2	FGF17	fibroblast growth factor 17 [Source:HGNC Symbol;Acc:HGNC:3673]
1656	0.352565092	8.58E-68	aPSM-2	TCHP	trichoplein keratin filament binding [Source:HGNC Symbol;Acc:HGNC:28135]
1657	0.318637213	2.16E-67	aPSM-2	EML4	EMAP like 4 [Source:HGNC Symbol;Acc:HGNC:1316]
1658	0.286406706	2.37E-66	aPSM-2	RAB30	RAB30, member RAS oncogene family [Source:HGNC Symbol;Acc:HGNC:9770]
1659	0.312731513	1.10E-65	aPSM-2	MLXIP	MLX interacting protein [Source:HGNC Symbol;Acc:HGNC:17055]
1660	0.271015726	1.23E-65	aPSM-2	PYGL	glycogen phosphorylase L [Source:HGNC Symbol;Acc:HGNC:9725]
1661	0.331178492	2.36E-65	aPSM-2	WWC2	WW and C2 domain containing 2 [Source:HGNC Symbol;Acc:HGNC:24148]
1662	0.306678055	1.15E-64	aPSM-2	RNF24	ring finger protein 24 [Source:HGNC Symbol;Acc:HGNC:13779]
1663	0.317683151	1.43E-64	aPSM-2	SLC5A3	solute carrier family 5 member 3 [Source:HGNC Symbol;Acc:HGNC:11038]
1664	0.273648325	2.72E-64	aPSM-2	MAP1B	microtubule associated protein 1B [Source:HGNC Symbol;Acc:HGNC:6836]
1665	0.270504323	5.02E-64	aPSM-2	FGF8	fibroblast growth factor 8 [Source:HGNC Symbol;Acc:HGNC:3686]
1666	0.265502455	7.37E-63	aPSM-2	EOGT	EGF domain specific O-linked N-acetylglucosamine transferase [Source:HGNC Symbol;Acc:HGNC:28526]
1667	0.28697692	7.39E-63	aPSM-2	C20orf27	chromosome 20 open reading frame 27 [Source:HGNC Symbol;Acc:HGNC:15873]
1668	0.286025155	9.00E-62	aPSM-2	MSX1	msh homeobox 1 [Source:HGNC Symbol;Acc:HGNC:7391]
1669	0.269340441	4.87E-61	aPSM-2	SHISA6	shisa family member 6 [Source:HGNC Symbol;Acc:HGNC:34491]
1670	0.256685231	5.54E-61	aPSM-2	HES6	hes family bHLH transcription factor 6 [Source:HGNC Symbol;Acc:HGNC:18254]
1671	0.278852192	6.86E-61	aPSM-2	SMC6	structural maintenance of chromosomes 6 [Source:HGNC Symbol;Acc:HGNC:20466]
1672	0.260091241	6.02E-59	aPSM-2	NOTCH1	notch receptor 1 [Source:HGNC Symbol;Acc:HGNC:7881]
1673	0.349625153	1.47E-57	aPSM-2	CTHRC1	collagen triple helix repeat containing 1 [Source:HGNC Symbol;Acc:HGNC:18831]
1674	0.257381655	1.47E-57	aPSM-2	FZD10	frizzled class receptor 10 [Source:HGNC Symbol;Acc:HGNC:4039]
1675	0.288795041	7.12E-57	aPSM-2	FOXC1	forkhead box C1 [Source:HGNC Symbol;Acc:HGNC:3800]
1676	0.307934233	1.54E-56	aPSM-2	CITED1	Cbp/p300 interacting transactivator with Glu/Asp rich carboxy-terminal domain 1 [Source:HGNC Symbol;Acc:HGNC:1986]
1677	0.285323263	2.74E-56	aPSM-2	FZD7	frizzled class receptor 7 [Source:HGNC Symbol;Acc:HGNC:4045]
1678	0.255868961	3.96E-56	aPSM-2	FAM89A	family with sequence similarity 89 member A [Source:HGNC Symbol;Acc:HGNC:25057]
1679	0.269086719	4.32E-56	aPSM-2	TMEM2	NA
1680	0.278814552	1.08E-54	aPSM-2	FBXW4	F-box and WD repeat domain containing 4 [Source:HGNC Symbol;Acc:HGNC:10847]
1681	0.253076498	2.19E-53	aPSM-2	9-Sep	NA
1682	0.284107971	9.29E-53	aPSM-2	SKAP2	src kinase associated phosphoprotein 2 [Source:HGNC Symbol;Acc:HGNC:15687]
1683	0.264551867	3.81E-52	aPSM-2	HOXB1	homeobox B1 [Source:HGNC Symbol;Acc:HGNC:5111]
1684	0.288708011	2.73E-51	aPSM-2	ITM2A	integral membrane protein 2A [Source:HGNC Symbol;Acc:HGNC:6173]
1685	0.259117159	1.70E-50	aPSM-2	PALLD	palladin, cytoskeletal associated protein [Source:HGNC Symbol;Acc:HGNC:17068]
1686	0.269907211	2.13E-50	aPSM-2	LINC00657	NA
1687	0.256825121	1.36E-49	aPSM-2	AIG1	androgen induced 1 [Source:HGNC Symbol;Acc:HGNC:21607]
1688	0.256482593	1.41E-49	aPSM-2	CYB5A	cytochrome b5 type A [Source:HGNC Symbol;Acc:HGNC:2570]
1689	0.275770561	7.76E-49	aPSM-2	PTEN	phosphatase and tensin homolog [Source:HGNC Symbol;Acc:HGNC:9588]
1690	0.271221704	2.15E-48	aPSM-2	DMRTA1	DMRT like family A1 [Source:HGNC Symbol;Acc:HGNC:13826]
1691	0.283268369	3.33E-46	aPSM-2	PRKAR1A	protein kinase cAMP-dependent type I regulatory subunit alpha [Source:HGNC Symbol;Acc:HGNC:9388]
1692	0.252685276	4.78E-45	aPSM-2	SERINC5	serine incorporator 5 [Source:HGNC Symbol;Acc:HGNC:18825]
1693	0.255318541	1.02E-44	aPSM-2	OLFML3	olfactomedin like 3 [Source:HGNC Symbol;Acc:HGNC:24956]
1694	0.26931175	2.18E-44	aPSM-2	IL17RD	interleukin 17 receptor D [Source:HGNC Symbol;Acc:HGNC:17616]
1695	0.260643439	2.13E-42	aPSM-2	DDAH1	dimethylarginine dimethylaminohydrolase 1 [Source:HGNC Symbol;Acc:HGNC:2715]
1696	0.25774752	6.52E-41	aPSM-2	LINC00667	long intergenic non-protein coding RNA 667 [Source:HGNC Symbol;Acc:HGNC:27906]
1697	0.250459449	1.03E-38	aPSM-2	FADS2	fatty acid desaturase 2 [Source:HGNC Symbol;Acc:HGNC:3575]
1698	0.254253208	4.51E-36	aPSM-2	NUFIP1	nuclear FMR1 interacting protein 1 [Source:HGNC Symbol;Acc:HGNC:8057]
1699	0.256946405	1.87E-34	aPSM-2	OPN3	opsin 3 [Source:HGNC Symbol;Acc:HGNC:14007]
1700	0.278024802	3.27E-25	aPSM-2	MT1X	metallothionein 1X [Source:HGNC Symbol;Acc:HGNC:7405]
1701	1.08642426	0	aPSM-3	HOXA-AS3	HOXA cluster antisense RNA 3 [Source:HGNC Symbol;Acc:HGNC:43748]
1702	1.001240021	0	aPSM-3	HIST1H1E	histone cluster 1 H1 family member e [Source:HGNC Symbol;Acc:HGNC:4718]
1703	0.94098894	0	aPSM-3	HIST1H1B	histone cluster 1 H1 family member b [Source:HGNC Symbol;Acc:HGNC:4719]
1704	0.925729071	0	aPSM-3	HIST1H4C	histone cluster 1 H4 family member c [Source:HGNC Symbol;Acc:HGNC:4787]
1705	0.822933	0	aPSM-3	HIST1H3B	histone cluster 1 H3 family member b [Source:HGNC Symbol;Acc:HGNC:4776]
1706	0.760475349	0	aPSM-3	ARHGAP11B	Rho GTPase activating protein 11B [Source:HGNC Symbol;Acc:HGNC:15782]
1707	0.711665342	0	aPSM-3	C3orf52	chromosome 3 open reading frame 52 [Source:HGNC Symbol;Acc:HGNC:26255]
1708	0.566245713	0	aPSM-3	OTUD7A	OTU deubiquitinase 7A [Source:HGNC Symbol;Acc:HGNC:20718]
1709	0.714246452	3.28E-287	aPSM-3	MEST	mesoderm specific transcript [Source:HGNC Symbol;Acc:HGNC:7028]
1710	0.789185559	2.53E-281	aPSM-3	RNASE1	ribonuclease A family member 1, pancreatic [Source:HGNC Symbol;Acc:HGNC:10044]
1711	0.579707855	3.08E-276	aPSM-3	ABCG1	ATP binding cassette subfamily G member 1 [Source:HGNC Symbol;Acc:HGNC:73]
1712	0.729257485	3.83E-274	aPSM-3	HIST1H3G	histone cluster 1 H3 family member g [Source:HGNC Symbol;Acc:HGNC:4772]
1713	0.780591109	3.08E-271	aPSM-3	HIST1H1C	histone cluster 1 H1 family member c [Source:HGNC Symbol;Acc:HGNC:4716]
1714	0.471642213	8.80E-271	aPSM-3	RBP1	retinol binding protein 1 [Source:HGNC Symbol;Acc:HGNC:9919]
1715	0.596814302	4.60E-270	aPSM-3	FLJ12825	NA
1716	0.735767507	2.98E-268	aPSM-3	HIST1H4H	histone cluster 1 H4 family member h [Source:HGNC Symbol;Acc:HGNC:4788]
1717	0.776908704	1.67E-265	aPSM-3	SAT1	spermidine/spermine N1-acetyltransferase 1 [Source:HGNC Symbol;Acc:HGNC:10540]
1718	0.546742834	1.04E-248	aPSM-3	HIST1H3J	histone cluster 1 H3 family member j [Source:HGNC Symbol;Acc:HGNC:4774]
1719	0.575372801	6.39E-248	aPSM-3	HIST1H2AE	histone cluster 1 H2A family member e [Source:HGNC Symbol;Acc:HGNC:4724]
1720	0.542848403	2.83E-239	aPSM-3	GTF3A	general transcription factor IIIA [Source:HGNC Symbol;Acc:HGNC:4662]
1721	0.582883474	4.55E-235	aPSM-3	PCSK5	proprotein convertase subtilisin/kexin type 5 [Source:HGNC Symbol;Acc:HGNC:8747]
1722	0.747929338	1.00E-232	aPSM-3	HOXB-AS3	HOXB cluster antisense RNA 3 [Source:HGNC Symbol;Acc:HGNC:40283]
1723	0.830172884	2.72E-221	aPSM-3	HIST1H1D	histone cluster 1 H1 family member d [Source:HGNC Symbol;Acc:HGNC:4717]
1724	0.609893862	2.76E-218	aPSM-3	HIST1H2AH	histone cluster 1 H2A family member h [Source:HGNC Symbol;Acc:HGNC:13671]
1725	0.597261902	7.58E-218	aPSM-3	GLUL	glutamate-ammonia ligase [Source:HGNC Symbol;Acc:HGNC:4341]
1726	0.426827182	1.34E-216	aPSM-3	SLC8A3	solute carrier family 8 member A3 [Source:HGNC Symbol;Acc:HGNC:11070]
1727	0.511136855	9.00E-216	aPSM-3	TMEM132C	transmembrane protein 132C [Source:HGNC Symbol;Acc:HGNC:25436]
1728	0.532330859	2.28E-213	aPSM-3	HIST1H3F	histone cluster 1 H3 family member f [Source:HGNC Symbol;Acc:HGNC:4773]
1729	0.559187398	1.60E-200	aPSM-3	LEF1	lymphoid enhancer binding factor 1 [Source:HGNC Symbol;Acc:HGNC:6551]
1730	0.260626021	2.90E-199	aPSM-3	XIRP2	xin actin binding repeat containing 2 [Source:HGNC Symbol;Acc:HGNC:14303]
1731	0.524754613	4.00E-198	aPSM-3	MME	membrane metalloendopeptidase [Source:HGNC Symbol;Acc:HGNC:7154]
1732	0.503103835	5.19E-189	aPSM-3	HIST1H3H	histone cluster 1 H3 family member h [Source:HGNC Symbol;Acc:HGNC:4775]
1733	0.518318892	1.87E-187	aPSM-3	CDX1	caudal type homeobox 1 [Source:HGNC Symbol;Acc:HGNC:1805]
1734	0.386058427	1.20E-186	aPSM-3	VWA2	von Willebrand factor A domain containing 2 [Source:HGNC Symbol;Acc:HGNC:24709]
1735	0.464419641	1.73E-183	aPSM-3	MLEC	malectin [Source:HGNC Symbol;Acc:HGNC:28973]
1736	0.395126767	8.66E-179	aPSM-3	RP11-844P9.2	NA
1737	0.515424256	1.66E-178	aPSM-3	PRTG	protogenin [Source:HGNC Symbol;Acc:HGNC:26373]
1738	0.498134808	2.82E-175	aPSM-3	STRA6	stimulated by retinoic acid 6 [Source:HGNC Symbol;Acc:HGNC:30650]
1739	0.428155658	2.82E-175	aPSM-3	HIST1H2AB	histone cluster 1 H2A family member b [Source:HGNC Symbol;Acc:HGNC:4734]
1740	0.466527961	1.53E-171	aPSM-3	RELL1	RELT like 1 [Source:HGNC Symbol;Acc:HGNC:27379]
1741	0.481776322	4.19E-171	aPSM-3	RP11-82L7.4	NA
1742	0.564287393	4.37E-171	aPSM-3	DLL3	delta like canonical Notch ligand 3 [Source:HGNC Symbol;Acc:HGNC:2909]
1743	0.5432134	2.50E-167	aPSM-3	GREB1L	GREB1 like retinoic acid receptor coactivator [Source:HGNC Symbol;Acc:HGNC:31042]
1744	0.535055342	3.41E-167	aPSM-3	HIST1H2AG	histone cluster 1 H2A family member g [Source:HGNC Symbol;Acc:HGNC:4737]
1745	0.531787183	1.59E-166	aPSM-3	URAD	ureidoimidazoline (2-oxo-4-hydroxy-4-carboxy-5-) decarboxylase [Source:HGNC Symbol;Acc:HGNC:17785]
1746	0.454605316	4.13E-166	aPSM-3	BAALC	BAALC binder of MAP3K1 and KLF4 [Source:HGNC Symbol;Acc:HGNC:14333]
1747	0.407453286	1.37E-163	aPSM-3	FREM2	FRAS1 related extracellular matrix 2 [Source:HGNC Symbol;Acc:HGNC:25396]
1748	0.414224192	2.98E-160	aPSM-3	ABHD12B	abhydrolase domain containing 12B [Source:HGNC Symbol;Acc:HGNC:19837]
1749	0.507545117	2.26E-158	aPSM-3	SLC7A8	solute carrier family 7 member 8 [Source:HGNC Symbol;Acc:HGNC:11066]
1750	0.558440511	9.65E-158	aPSM-3	PEG10	paternally expressed 10 [Source:HGNC Symbol;Acc:HGNC:14005]
1751	0.411246909	5.29E-157	aPSM-3	NOTUM	notum, palmitoleoyl-protein carboxylesterase [Source:HGNC Symbol;Acc:HGNC:27106]
1752	0.453155733	1.25E-156	aPSM-3	DEFA6	defensin alpha 6 [Source:HGNC Symbol;Acc:HGNC:2765]
1753	0.398211683	2.59E-156	aPSM-3	ARPC2	actin related protein 2/3 complex subunit 2 [Source:HGNC Symbol;Acc:HGNC:705]
1754	0.545011847	1.43E-154	aPSM-3	HIST2H2AC	histone cluster 2 H2A family member c [Source:HGNC Symbol;Acc:HGNC:4738]
1755	0.522530781	4.04E-154	aPSM-3	DUSP6	dual specificity phosphatase 6 [Source:HGNC Symbol;Acc:HGNC:3072]
1756	0.395838829	1.19E-153	aPSM-3	HIST1H4D	histone cluster 1 H4 family member d [Source:HGNC Symbol;Acc:HGNC:4782]
1757	0.534102444	2.66E-148	aPSM-3	TCHP	trichoplein keratin filament binding [Source:HGNC Symbol;Acc:HGNC:28135]
1758	0.25574035	6.93E-148	aPSM-3	TMSB10	thymosin beta 10 [Source:HGNC Symbol;Acc:HGNC:11879]
1759	0.554817621	1.37E-146	aPSM-3	HES7	hes family bHLH transcription factor 7 [Source:HGNC Symbol;Acc:HGNC:15977]
1760	0.416883552	1.47E-143	aPSM-3	S1PR3	sphingosine-1-phosphate receptor 3 [Source:HGNC Symbol;Acc:HGNC:3167]
1761	0.30337039	1.73E-143	aPSM-3	HIST1H2BO	histone cluster 1 H2B family member o [Source:HGNC Symbol;Acc:HGNC:4758]
1762	0.464968738	3.39E-141	aPSM-3	TBX6	T-box transcription factor 6 [Source:HGNC Symbol;Acc:HGNC:11605]
1763	0.41345175	6.25E-140	aPSM-3	HIST1H2BC	histone cluster 1 H2B family member c [Source:HGNC Symbol;Acc:HGNC:4757]
1764	0.399407967	6.58E-140	aPSM-3	NID1	nidogen 1 [Source:HGNC Symbol;Acc:HGNC:7821]
1765	0.460390342	1.03E-139	aPSM-3	FGF8	fibroblast growth factor 8 [Source:HGNC Symbol;Acc:HGNC:3686]
1766	0.472315381	4.45E-137	aPSM-3	FGF17	fibroblast growth factor 17 [Source:HGNC Symbol;Acc:HGNC:3673]
1767	0.433621265	4.09E-133	aPSM-3	HOXB3	homeobox B3 [Source:HGNC Symbol;Acc:HGNC:5114]
1768	0.3088545	4.34E-132	aPSM-3	C18orf42	NA
1769	0.4275354	1.21E-131	aPSM-3	C20orf27	chromosome 20 open reading frame 27 [Source:HGNC Symbol;Acc:HGNC:15873]
1770	0.355375128	3.78E-131	aPSM-3	HIST2H2AA4	histone cluster 2 H2A family member a4 [Source:HGNC Symbol;Acc:HGNC:29668]
1771	0.330382716	5.96E-131	aPSM-3	TPM3	tropomyosin 3 [Source:HGNC Symbol;Acc:HGNC:12012]
1772	0.471702692	5.35E-130	aPSM-3	NKD1	NKD inhibitor of WNT signaling pathway 1 [Source:HGNC Symbol;Acc:HGNC:17045]
1773	0.297480871	7.90E-129	aPSM-3	TNFRSF11A	TNF receptor superfamily member 11a [Source:HGNC Symbol;Acc:HGNC:11908]
1774	0.393769936	1.42E-126	aPSM-3	MAGI1	membrane associated guanylate kinase, WW and PDZ domain containing 1 [Source:HGNC Symbol;Acc:HGNC:946]
1775	0.480203434	6.98E-123	aPSM-3	GLTP	glycolipid transfer protein [Source:HGNC Symbol;Acc:HGNC:24867]
1776	0.347129175	1.49E-122	aPSM-3	RASGRP3	RAS guanyl releasing protein 3 [Source:HGNC Symbol;Acc:HGNC:14545]
1777	0.309676229	2.40E-122	aPSM-3	CBX5	chromobox 5 [Source:HGNC Symbol;Acc:HGNC:1555]
1778	0.46842091	1.40E-120	aPSM-3	CITED1	Cbp/p300 interacting transactivator with Glu/Asp rich carboxy-terminal domain 1 [Source:HGNC Symbol;Acc:HGNC:1986]
1779	0.349615367	1.41E-118	aPSM-3	HOXA3	homeobox A3 [Source:HGNC Symbol;Acc:HGNC:5104]
1780	0.410570468	2.20E-116	aPSM-3	MLLT3	MLLT3 super elongation complex subunit [Source:HGNC Symbol;Acc:HGNC:7136]
1781	0.321727072	2.24E-116	aPSM-3	FAM219A	family with sequence similarity 219 member A [Source:HGNC Symbol;Acc:HGNC:19920]
1782	0.368786559	6.47E-115	aPSM-3	ENPP2	ectonucleotide pyrophosphatase/phosphodiesterase 2 [Source:HGNC Symbol;Acc:HGNC:3357]
1783	0.422042391	7.98E-114	aPSM-3	ROCK2	Rho associated coiled-coil containing protein kinase 2 [Source:HGNC Symbol;Acc:HGNC:10252]
1784	0.367787244	2.01E-113	aPSM-3	ST6GALNAC3	ST6 N-acetylgalactosaminide alpha-2,6-sialyltransferase 3 [Source:HGNC Symbol;Acc:HGNC:19343]
1785	0.391081044	4.15E-113	aPSM-3	SLC1A5	solute carrier family 1 member 5 [Source:HGNC Symbol;Acc:HGNC:10943]
1786	0.457871271	9.23E-113	aPSM-3	ASS1	argininosuccinate synthase 1 [Source:HGNC Symbol;Acc:HGNC:758]
1787	0.463053898	2.14E-112	aPSM-3	PTCH1	patched 1 [Source:HGNC Symbol;Acc:HGNC:9585]
1788	0.346196646	3.70E-109	aPSM-3	DCXR	dicarbonyl and L-xylulose reductase [Source:HGNC Symbol;Acc:HGNC:18985]
1789	0.303181404	5.12E-108	aPSM-3	HIST1H4E	histone cluster 1 H4 family member e [Source:HGNC Symbol;Acc:HGNC:4790]
1790	0.269595057	3.04E-106	aPSM-3	VIM	vimentin [Source:HGNC Symbol;Acc:HGNC:12692]
1791	0.315355954	1.04E-105	aPSM-3	FMN1	formin 1 [Source:HGNC Symbol;Acc:HGNC:3768]
1792	0.32329266	1.40E-104	aPSM-3	PCDH19	protocadherin 19 [Source:HGNC Symbol;Acc:HGNC:14270]
1793	0.302955717	8.60E-104	aPSM-3	MTPN	myotrophin [Source:HGNC Symbol;Acc:HGNC:15667]
1794	0.365393416	4.04E-103	aPSM-3	HIST1H2AC	histone cluster 1 H2A family member c [Source:HGNC Symbol;Acc:HGNC:4733]
1795	0.357283899	1.86E-102	aPSM-3	EXOC6B	exocyst complex component 6B [Source:HGNC Symbol;Acc:HGNC:17085]
1796	0.331338415	1.77E-101	aPSM-3	HOXB8	homeobox B8 [Source:HGNC Symbol;Acc:HGNC:5119]
1797	0.350346689	2.45E-100	aPSM-3	SMC6	structural maintenance of chromosomes 6 [Source:HGNC Symbol;Acc:HGNC:20466]
1798	0.302580574	4.31E-100	aPSM-3	SMOC2	SPARC related modular calcium binding 2 [Source:HGNC Symbol;Acc:HGNC:20323]
1799	0.388617529	5.60E-100	aPSM-3	CXCR4	C-X-C motif chemokine receptor 4 [Source:HGNC Symbol;Acc:HGNC:2561]
1800	0.350630931	7.02E-100	aPSM-3	HIST1H4I	histone cluster 1 H4 family member i [Source:HGNC Symbol;Acc:HGNC:4793]
1801	0.398935521	1.30E-98	aPSM-3	WWC2	WW and C2 domain containing 2 [Source:HGNC Symbol;Acc:HGNC:24148]
1802	0.309183671	6.62E-98	aPSM-3	EGFLAM	EGF like, fibronectin type III and laminin G domains [Source:HGNC Symbol;Acc:HGNC:26810]
1803	0.366069101	2.50E-97	aPSM-3	NDFIP2	Nedd4 family interacting protein 2 [Source:HGNC Symbol;Acc:HGNC:18537]
1804	0.275174206	4.81E-97	aPSM-3	RP11-834C11.6	NA
1805	0.333091445	1.77E-94	aPSM-3	PRSS23	serine protease 23 [Source:HGNC Symbol;Acc:HGNC:14370]
1806	0.381010236	5.78E-94	aPSM-3	RNF24	ring finger protein 24 [Source:HGNC Symbol;Acc:HGNC:13779]
1807	0.367179293	9.80E-94	aPSM-3	HOXB4	homeobox B4 [Source:HGNC Symbol;Acc:HGNC:5115]
1808	0.353284124	1.03E-93	aPSM-3	GPC3	glypican 3 [Source:HGNC Symbol;Acc:HGNC:4451]
1809	0.256782823	2.96E-93	aPSM-3	ZAP70	zeta chain of T cell receptor associated protein kinase 70 [Source:HGNC Symbol;Acc:HGNC:12858]
1810	0.268084917	7.77E-92	aPSM-3	HOXC4	homeobox C4 [Source:HGNC Symbol;Acc:HGNC:5126]
1811	0.330591878	1.34E-91	aPSM-3	CHRNA3	cholinergic receptor nicotinic alpha 3 subunit [Source:HGNC Symbol;Acc:HGNC:1957]
1812	0.295398945	3.98E-90	aPSM-3	HIST2H2BF	histone cluster 2 H2B family member f [Source:HGNC Symbol;Acc:HGNC:24700]
1813	0.326623223	5.99E-89	aPSM-3	HIST1H2BJ	histone cluster 1 H2B family member j [Source:HGNC Symbol;Acc:HGNC:4761]
1814	0.338510441	3.54E-88	aPSM-3	PCBP4	poly(rC) binding protein 4 [Source:HGNC Symbol;Acc:HGNC:8652]
1815	0.306000928	1.34E-87	aPSM-3	ETV5	ETS variant 5 [Source:HGNC Symbol;Acc:HGNC:3494]
1816	0.282146305	1.70E-87	aPSM-3	COTL1	coactosin like F-actin binding protein 1 [Source:HGNC Symbol;Acc:HGNC:18304]
1817	0.291838953	6.60E-86	aPSM-3	C18orf54	chromosome 18 open reading frame 54 [Source:HGNC Symbol;Acc:HGNC:13796]
1818	0.252183893	4.37E-83	aPSM-3	HIST2H4B	histone cluster 2 H4 family member b [Source:HGNC Symbol;Acc:HGNC:29607]
1819	0.310832456	5.17E-82	aPSM-3	SEMA4D	semaphorin 4D [Source:HGNC Symbol;Acc:HGNC:10732]
1820	0.336856585	7.54E-81	aPSM-3	HAS2	hyaluronan synthase 2 [Source:HGNC Symbol;Acc:HGNC:4819]
1821	0.296964537	1.13E-79	aPSM-3	SQLE	squalene epoxidase [Source:HGNC Symbol;Acc:HGNC:11279]
1822	0.261705408	3.94E-79	aPSM-3	LINC00540	NA
1823	0.318372192	4.64E-79	aPSM-3	NCAM1	neural cell adhesion molecule 1 [Source:HGNC Symbol;Acc:HGNC:7656]
1824	0.339401992	8.38E-79	aPSM-3	SCRN1	secernin 1 [Source:HGNC Symbol;Acc:HGNC:22192]
1825	0.394470301	2.73E-77	aPSM-3	PPFIBP1	PPFIA binding protein 1 [Source:HGNC Symbol;Acc:HGNC:9249]
1826	0.297684242	9.41E-76	aPSM-3	TYMS	thymidylate synthetase [Source:HGNC Symbol;Acc:HGNC:12441]
1827	0.288033552	3.92E-75	aPSM-3	EOGT	EGF domain specific O-linked N-acetylglucosamine transferase [Source:HGNC Symbol;Acc:HGNC:28526]
1828	0.334693548	8.17E-75	aPSM-3	PLS3	plastin 3 [Source:HGNC Symbol;Acc:HGNC:9091]
1829	0.315878971	4.40E-74	aPSM-3	CDH11	cadherin 11 [Source:HGNC Symbol;Acc:HGNC:1750]
1830	0.30208314	4.65E-74	aPSM-3	TIMM50	translocase of inner mitochondrial membrane 50 [Source:HGNC Symbol;Acc:HGNC:23656]
1831	0.25660369	4.03E-73	aPSM-3	KTN1	kinectin 1 [Source:HGNC Symbol;Acc:HGNC:6467]
1832	0.33355224	6.93E-73	aPSM-3	MPDZ	multiple PDZ domain crumbs cell polarity complex component [Source:HGNC Symbol;Acc:HGNC:7208]
1833	0.332121467	3.69E-72	aPSM-3	IL17RD	interleukin 17 receptor D [Source:HGNC Symbol;Acc:HGNC:17616]
1834	0.334322253	5.39E-72	aPSM-3	PALLD	palladin, cytoskeletal associated protein [Source:HGNC Symbol;Acc:HGNC:17068]
1835	0.314352682	2.65E-71	aPSM-3	SYT1	synaptotagmin 1 [Source:HGNC Symbol;Acc:HGNC:11509]
1836	0.320517537	6.82E-71	aPSM-3	FAM98A	family with sequence similarity 98 member A [Source:HGNC Symbol;Acc:HGNC:24520]
1837	0.268061118	8.52E-71	aPSM-3	E2F8	E2F transcription factor 8 [Source:HGNC Symbol;Acc:HGNC:24727]
1838	0.317750705	3.63E-70	aPSM-3	LMO2	LIM domain only 2 [Source:HGNC Symbol;Acc:HGNC:6642]
1839	0.284406826	7.84E-70	aPSM-3	HOXB1	homeobox B1 [Source:HGNC Symbol;Acc:HGNC:5111]
1840	0.314226211	1.62E-68	aPSM-3	ASPSCR1	ASPSCR1 tether for SLC2A4, UBX domain containing [Source:HGNC Symbol;Acc:HGNC:13825]
1841	0.278102801	5.01E-68	aPSM-3	AP1B1	adaptor related protein complex 1 subunit beta 1 [Source:HGNC Symbol;Acc:HGNC:554]
1842	0.258066063	1.01E-66	aPSM-3	S100A13	S100 calcium binding protein A13 [Source:HGNC Symbol;Acc:HGNC:10490]
1843	0.368901535	2.02E-64	aPSM-3	NTS	neurotensin [Source:HGNC Symbol;Acc:HGNC:8038]
1844	0.302382481	3.37E-64	aPSM-3	ACSS3	acyl-CoA synthetase short chain family member 3 [Source:HGNC Symbol;Acc:HGNC:24723]
1845	0.296656808	6.49E-63	aPSM-3	CCDC186	coiled-coil domain containing 186 [Source:HGNC Symbol;Acc:HGNC:24349]
1846	0.254823107	1.71E-62	aPSM-3	BDNF	brain derived neurotrophic factor [Source:HGNC Symbol;Acc:HGNC:1033]
1847	0.277959688	1.98E-62	aPSM-3	SEC24C	SEC24 homolog C, COPII coat complex component [Source:HGNC Symbol;Acc:HGNC:10705]
1848	0.288432192	4.35E-62	aPSM-3	ARID3A	AT-rich interaction domain 3A [Source:HGNC Symbol;Acc:HGNC:3031]
1849	0.277634087	5.45E-62	aPSM-3	SCD	stearoyl-CoA desaturase [Source:HGNC Symbol;Acc:HGNC:10571]
1850	0.270904976	5.59E-62	aPSM-3	HES6	hes family bHLH transcription factor 6 [Source:HGNC Symbol;Acc:HGNC:18254]
1851	0.271915387	1.12E-61	aPSM-3	TTN	titin [Source:HGNC Symbol;Acc:HGNC:12403]
1852	0.276760826	2.32E-61	aPSM-3	RSPO3	R-spondin 3 [Source:HGNC Symbol;Acc:HGNC:20866]
1853	0.296908015	9.63E-61	aPSM-3	DSG2	desmoglein 2 [Source:HGNC Symbol;Acc:HGNC:3049]
1854	0.293737704	1.65E-60	aPSM-3	PHC2	polyhomeotic homolog 2 [Source:HGNC Symbol;Acc:HGNC:3183]
1855	0.282439972	3.34E-60	aPSM-3	PLXNA2	plexin A2 [Source:HGNC Symbol;Acc:HGNC:9100]
1856	0.27598434	6.11E-60	aPSM-3	MLXIP	MLX interacting protein [Source:HGNC Symbol;Acc:HGNC:17055]
1857	0.296817561	3.38E-59	aPSM-3	FOXB1	forkhead box B1 [Source:HGNC Symbol;Acc:HGNC:3799]
1858	0.27738953	3.45E-59	aPSM-3	TM9SF4	transmembrane 9 superfamily member 4 [Source:HGNC Symbol;Acc:HGNC:30797]
1859	0.303352494	6.99E-59	aPSM-3	SACS	sacsin molecular chaperone [Source:HGNC Symbol;Acc:HGNC:10519]
1860	0.273370599	1.32E-58	aPSM-3	PYGL	glycogen phosphorylase L [Source:HGNC Symbol;Acc:HGNC:9725]
1861	0.266280124	7.73E-58	aPSM-3	HIST1H2AL	histone cluster 1 H2A family member l [Source:HGNC Symbol;Acc:HGNC:4730]
1862	0.286111846	1.23E-56	aPSM-3	SV2A	synaptic vesicle glycoprotein 2A [Source:HGNC Symbol;Acc:HGNC:20566]
1863	0.297901496	1.47E-56	aPSM-3	IGFBP4	insulin like growth factor binding protein 4 [Source:HGNC Symbol;Acc:HGNC:5473]
1864	0.278704584	2.15E-55	aPSM-3	TMEM123	transmembrane protein 123 [Source:HGNC Symbol;Acc:HGNC:30138]
1865	0.273722753	6.35E-53	aPSM-3	SKAP2	src kinase associated phosphoprotein 2 [Source:HGNC Symbol;Acc:HGNC:15687]
1866	0.254610116	5.77E-52	aPSM-3	TMEM97	transmembrane protein 97 [Source:HGNC Symbol;Acc:HGNC:28106]
1867	0.269228943	6.63E-52	aPSM-3	COL18A1	collagen type XVIII alpha 1 chain [Source:HGNC Symbol;Acc:HGNC:2195]
1868	0.26881011	2.85E-51	aPSM-3	CCDC109B	NA
1869	0.258332292	3.09E-51	aPSM-3	COLEC12	collectin subfamily member 12 [Source:HGNC Symbol;Acc:HGNC:16016]
1870	0.267188938	4.61E-51	aPSM-3	FAM89A	family with sequence similarity 89 member A [Source:HGNC Symbol;Acc:HGNC:25057]
1871	0.258632771	6.30E-51	aPSM-3	TTC29	tetratricopeptide repeat domain 29 [Source:HGNC Symbol;Acc:HGNC:29936]
1872	0.277158636	1.39E-50	aPSM-3	BDP1	B double prime 1, subunit of RNA polymerase III transcription initiation factor IIIB [Source:HGNC Symbol;Acc:HGNC:13652]
1873	0.274890781	7.58E-50	aPSM-3	LINC00667	long intergenic non-protein coding RNA 667 [Source:HGNC Symbol;Acc:HGNC:27906]
1874	0.316465242	7.06E-48	aPSM-3	CTHRC1	collagen triple helix repeat containing 1 [Source:HGNC Symbol;Acc:HGNC:18831]
1875	0.26611186	1.52E-46	aPSM-3	ITM2A	integral membrane protein 2A [Source:HGNC Symbol;Acc:HGNC:6173]
1876	0.273367979	2.63E-44	aPSM-3	ADGRL2	adhesion G protein-coupled receptor L2 [Source:HGNC Symbol;Acc:HGNC:18582]
1877	0.252353025	4.34E-44	aPSM-3	ATP1A1	ATPase Na+/K+ transporting subunit alpha 1 [Source:HGNC Symbol;Acc:HGNC:799]
1878	0.254513301	3.18E-43	aPSM-3	HMGCR	3-hydroxy-3-methylglutaryl-CoA reductase [Source:HGNC Symbol;Acc:HGNC:5006]
1879	0.256920576	3.68E-33	aPSM-3	CDX4	caudal type homeobox 4 [Source:HGNC Symbol;Acc:HGNC:1808]
1880	1.689033379	0	aPSM-4	ANXA1	annexin A1 [Source:HGNC Symbol;Acc:HGNC:533]
1881	1.557756523	0	aPSM-4	FILIP1L	filamin A interacting protein 1 like [Source:HGNC Symbol;Acc:HGNC:24589]
1882	1.513779609	0	aPSM-4	CYP1B1	cytochrome P450 family 1 subfamily B member 1 [Source:HGNC Symbol;Acc:HGNC:2597]
1883	1.402253591	0	aPSM-4	PHLDA2	pleckstrin homology like domain family A member 2 [Source:HGNC Symbol;Acc:HGNC:12385]
1884	1.22055108	0	aPSM-4	TNNC1	troponin C1, slow skeletal and cardiac type [Source:HGNC Symbol;Acc:HGNC:11943]
1885	1.181593777	0	aPSM-4	LINC00152	NA
1886	1.055453328	0	aPSM-4	GLIPR1	GLI pathogenesis related 1 [Source:HGNC Symbol;Acc:HGNC:17001]
1887	0.890219453	0	aPSM-4	MIR4435-2HG	MIR4435-2 host gene [Source:HGNC Symbol;Acc:HGNC:35163]
1888	0.848986101	0	aPSM-4	PSTPIP1	proline-serine-threonine phosphatase interacting protein 1 [Source:HGNC Symbol;Acc:HGNC:9580]
1889	0.803216412	0	aPSM-4	MYL4	myosin light chain 4 [Source:HGNC Symbol;Acc:HGNC:7585]
1890	0.62293215	0	aPSM-4	WNT6	Wnt family member 6 [Source:HGNC Symbol;Acc:HGNC:12785]
1891	0.979620945	9.38E-300	aPSM-4	VIM	vimentin [Source:HGNC Symbol;Acc:HGNC:12692]
1892	1.671808718	1.48E-293	aPSM-4	KRT18	keratin 18 [Source:HGNC Symbol;Acc:HGNC:6430]
1893	0.431450249	3.41E-290	aPSM-4	NAV3	neuron navigator 3 [Source:HGNC Symbol;Acc:HGNC:15998]
1894	1.913260088	2.99E-285	aPSM-4	TAGLN	transgelin [Source:HGNC Symbol;Acc:HGNC:11553]
1895	1.106219244	1.51E-278	aPSM-4	ANXA2	annexin A2 [Source:HGNC Symbol;Acc:HGNC:537]
1896	1.236577561	5.81E-260	aPSM-4	CLDN11	claudin 11 [Source:HGNC Symbol;Acc:HGNC:8514]
1897	1.381979175	1.12E-259	aPSM-4	KRT8	keratin 8 [Source:HGNC Symbol;Acc:HGNC:6446]
1898	1.563515711	3.23E-259	aPSM-4	KRT19	keratin 19 [Source:HGNC Symbol;Acc:HGNC:6436]
1899	1.097087581	7.94E-257	aPSM-4	VAMP5	vesicle associated membrane protein 5 [Source:HGNC Symbol;Acc:HGNC:12646]
1900	1.197937846	3.58E-255	aPSM-4	MYL9	myosin light chain 9 [Source:HGNC Symbol;Acc:HGNC:15754]
1901	0.872657863	8.41E-254	aPSM-4	CNN1	calponin 1 [Source:HGNC Symbol;Acc:HGNC:2155]
1902	0.91179905	5.99E-240	aPSM-4	MT1E	metallothionein 1E [Source:HGNC Symbol;Acc:HGNC:7397]
1903	1.406093859	7.24E-235	aPSM-4	LGALS1	galectin 1 [Source:HGNC Symbol;Acc:HGNC:6561]
1904	0.714599695	1.01E-231	aPSM-4	OPTN	optineurin [Source:HGNC Symbol;Acc:HGNC:17142]
1905	0.524286722	1.24E-227	aPSM-4	IL32	interleukin 32 [Source:HGNC Symbol;Acc:HGNC:16830]
1906	0.571386145	2.10E-223	aPSM-4	ANKRD1	ankyrin repeat domain 1 [Source:HGNC Symbol;Acc:HGNC:15819]
1907	1.003991027	5.80E-223	aPSM-4	HES4	hes family bHLH transcription factor 4 [Source:HGNC Symbol;Acc:HGNC:24149]
1908	0.31432296	5.95E-222	aPSM-4	RP11-14N7.2	NA
1909	0.398713297	3.27E-221	aPSM-4	MRGPRF	MAS related GPR family member F [Source:HGNC Symbol;Acc:HGNC:24828]
1910	1.032382616	8.42E-218	aPSM-4	ARHGAP29	Rho GTPase activating protein 29 [Source:HGNC Symbol;Acc:HGNC:30207]
1911	0.752929856	5.32E-216	aPSM-4	RCN2	reticulocalbin 2 [Source:HGNC Symbol;Acc:HGNC:9935]
1912	0.343619893	9.69E-216	aPSM-4	PTRF	NA
1913	0.67570342	3.77E-215	aPSM-4	CLIC1	chloride intracellular channel 1 [Source:HGNC Symbol;Acc:HGNC:2062]
1914	0.896143163	2.41E-213	aPSM-4	TAGLN2	transgelin 2 [Source:HGNC Symbol;Acc:HGNC:11554]
1915	1.209662943	2.87E-213	aPSM-4	SAT1	spermidine/spermine N1-acetyltransferase 1 [Source:HGNC Symbol;Acc:HGNC:10540]
1916	0.799843387	1.02E-208	aPSM-4	COTL1	coactosin like F-actin binding protein 1 [Source:HGNC Symbol;Acc:HGNC:18304]
1917	0.348723559	1.40E-208	aPSM-4	C11orf87	chromosome 11 open reading frame 87 [Source:HGNC Symbol;Acc:HGNC:33788]
1918	0.507056804	1.60E-200	aPSM-4	MYL6	myosin light chain 6 [Source:HGNC Symbol;Acc:HGNC:7587]
1919	0.966439971	2.20E-200	aPSM-4	S100A6	S100 calcium binding protein A6 [Source:HGNC Symbol;Acc:HGNC:10496]
1920	0.866602847	1.71E-197	aPSM-4	RP11-82L7.4	NA
1921	0.667332259	3.72E-195	aPSM-4	TPM2	tropomyosin 2 [Source:HGNC Symbol;Acc:HGNC:12011]
1922	0.606116612	1.25E-191	aPSM-4	AHNAK	AHNAK nucleoprotein [Source:HGNC Symbol;Acc:HGNC:347]
1923	0.849232058	2.76E-189	aPSM-4	OLFML3	olfactomedin like 3 [Source:HGNC Symbol;Acc:HGNC:24956]
1924	1.158958155	1.62E-179	aPSM-4	MT2A	metallothionein 2A [Source:HGNC Symbol;Acc:HGNC:7406]
1925	0.326566437	3.58E-173	aPSM-4	MCAM	melanoma cell adhesion molecule [Source:HGNC Symbol;Acc:HGNC:6934]
1926	0.625762391	8.79E-173	aPSM-4	PMP22	peripheral myelin protein 22 [Source:HGNC Symbol;Acc:HGNC:9118]
1927	0.677155296	1.86E-167	aPSM-4	TPM4	tropomyosin 4 [Source:HGNC Symbol;Acc:HGNC:12013]
1928	0.622292919	3.54E-167	aPSM-4	DUSP5	dual specificity phosphatase 5 [Source:HGNC Symbol;Acc:HGNC:3071]
1929	0.913274578	4.54E-166	aPSM-4	BMP4	bone morphogenetic protein 4 [Source:HGNC Symbol;Acc:HGNC:1071]
1930	1.126581608	1.10E-165	aPSM-4	NEAT1	nuclear paraspeckle assembly transcript 1 [Source:HGNC Symbol;Acc:HGNC:30815]
1931	0.710224208	2.01E-165	aPSM-4	MYL7	myosin light chain 7 [Source:HGNC Symbol;Acc:HGNC:21719]
1932	0.600741669	9.62E-162	aPSM-4	S100A11	S100 calcium binding protein A11 [Source:HGNC Symbol;Acc:HGNC:10488]
1933	0.392865013	2.36E-161	aPSM-4	RBMS3	RNA binding motif single stranded interacting protein 3 [Source:HGNC Symbol;Acc:HGNC:13427]
1934	1.684457496	5.26E-160	aPSM-4	DEFA5	defensin alpha 5 [Source:HGNC Symbol;Acc:HGNC:2764]
1935	0.415928724	4.62E-159	aPSM-4	GNAS	GNAS complex locus [Source:HGNC Symbol;Acc:HGNC:4392]
1936	0.449919954	2.66E-158	aPSM-4	NPPB	natriuretic peptide B [Source:HGNC Symbol;Acc:HGNC:7940]
1937	0.751101873	2.41E-155	aPSM-4	S100A10	S100 calcium binding protein A10 [Source:HGNC Symbol;Acc:HGNC:10487]
1938	0.561229952	2.52E-154	aPSM-4	CCL26	C-C motif chemokine ligand 26 [Source:HGNC Symbol;Acc:HGNC:10625]
1939	0.516764505	4.41E-154	aPSM-4	RRAS	RAS related [Source:HGNC Symbol;Acc:HGNC:10447]
1940	0.689050064	4.45E-154	aPSM-4	JUN	Jun proto-oncogene, AP-1 transcription factor subunit [Source:HGNC Symbol;Acc:HGNC:6204]
1941	1.240799183	1.29E-152	aPSM-4	ACTC1	actin alpha cardiac muscle 1 [Source:HGNC Symbol;Acc:HGNC:143]
1942	0.406511458	1.81E-151	aPSM-4	CTGF	NA
1943	0.675398853	1.37E-150	aPSM-4	GADD45A	growth arrest and DNA damage inducible alpha [Source:HGNC Symbol;Acc:HGNC:4095]
1944	0.882128129	2.43E-148	aPSM-4	REG3A	regenerating family member 3 alpha [Source:HGNC Symbol;Acc:HGNC:8601]
1945	0.753986547	4.54E-147	aPSM-4	EMP3	epithelial membrane protein 3 [Source:HGNC Symbol;Acc:HGNC:3335]
1946	0.51665675	8.02E-146	aPSM-4	MTPN	myotrophin [Source:HGNC Symbol;Acc:HGNC:15667]
1947	0.520454461	5.11E-144	aPSM-4	ABHD12B	abhydrolase domain containing 12B [Source:HGNC Symbol;Acc:HGNC:19837]
1948	0.683327784	2.00E-143	aPSM-4	DSP	desmoplakin [Source:HGNC Symbol;Acc:HGNC:3052]
1949	0.594563595	8.41E-143	aPSM-4	STMN2	stathmin 2 [Source:HGNC Symbol;Acc:HGNC:10577]
1950	0.967127897	1.14E-142	aPSM-4	MT1X	metallothionein 1X [Source:HGNC Symbol;Acc:HGNC:7405]
1951	0.41159972	1.50E-142	aPSM-4	ACTB	actin beta [Source:HGNC Symbol;Acc:HGNC:132]
1952	0.405652345	3.27E-142	aPSM-4	HOXD1	homeobox D1 [Source:HGNC Symbol;Acc:HGNC:5132]
1953	0.565265875	2.10E-140	aPSM-4	MYL12A	myosin light chain 12A [Source:HGNC Symbol;Acc:HGNC:16701]
1954	0.646656024	8.53E-140	aPSM-4	PDLIM7	PDZ and LIM domain 7 [Source:HGNC Symbol;Acc:HGNC:22958]
1955	0.435472423	1.11E-139	aPSM-4	CD63	CD63 molecule [Source:HGNC Symbol;Acc:HGNC:1692]
1956	0.714863877	2.85E-139	aPSM-4	MEST	mesoderm specific transcript [Source:HGNC Symbol;Acc:HGNC:7028]
1957	0.64482291	8.21E-138	aPSM-4	PRKCDBP	NA
1958	0.704455449	2.37E-137	aPSM-4	NKD1	NKD inhibitor of WNT signaling pathway 1 [Source:HGNC Symbol;Acc:HGNC:17045]
1959	0.332511023	3.35E-137	aPSM-4	TGFBI	transforming growth factor beta induced [Source:HGNC Symbol;Acc:HGNC:11771]
1960	0.848719669	3.12E-136	aPSM-4	TNFRSF12A	TNF receptor superfamily member 12A [Source:HGNC Symbol;Acc:HGNC:18152]
1961	0.650203196	4.31E-135	aPSM-4	COLEC12	collectin subfamily member 12 [Source:HGNC Symbol;Acc:HGNC:16016]
1962	0.770563053	4.68E-133	aPSM-4	ARL4A	ADP ribosylation factor like GTPase 4A [Source:HGNC Symbol;Acc:HGNC:695]
1963	0.403184414	9.38E-129	aPSM-4	BMP3	bone morphogenetic protein 3 [Source:HGNC Symbol;Acc:HGNC:1070]
1964	0.655221729	2.98E-128	aPSM-4	TUBB6	tubulin beta 6 class V [Source:HGNC Symbol;Acc:HGNC:20776]
1965	0.614408596	1.23E-127	aPSM-4	NES	nestin [Source:HGNC Symbol;Acc:HGNC:7756]
1966	0.470175897	1.13E-126	aPSM-4	AFAP1L2	actin filament associated protein 1 like 2 [Source:HGNC Symbol;Acc:HGNC:25901]
1967	0.666356451	2.75E-126	aPSM-4	SQSTM1	sequestosome 1 [Source:HGNC Symbol;Acc:HGNC:11280]
1968	0.567967016	3.15E-126	aPSM-4	TIMP1	TIMP metallopeptidase inhibitor 1 [Source:HGNC Symbol;Acc:HGNC:11820]
1969	0.450416632	3.64E-126	aPSM-4	ARSI	arylsulfatase family member I [Source:HGNC Symbol;Acc:HGNC:32521]
1970	0.697536307	4.78E-126	aPSM-4	ASS1	argininosuccinate synthase 1 [Source:HGNC Symbol;Acc:HGNC:758]
1971	0.637422731	3.34E-125	aPSM-4	EML4	EMAP like 4 [Source:HGNC Symbol;Acc:HGNC:1316]
1972	0.732250792	6.53E-125	aPSM-4	CTSZ	cathepsin Z [Source:HGNC Symbol;Acc:HGNC:2547]
1973	0.516525335	2.50E-121	aPSM-4	TMEM50A	transmembrane protein 50A [Source:HGNC Symbol;Acc:HGNC:30590]
1974	0.479046422	3.86E-121	aPSM-4	MRPS6	mitochondrial ribosomal protein S6 [Source:HGNC Symbol;Acc:HGNC:14051]
1975	0.722936652	5.25E-121	aPSM-4	PALLD	palladin, cytoskeletal associated protein [Source:HGNC Symbol;Acc:HGNC:17068]
1976	0.348200843	3.12E-120	aPSM-4	GABRA2	gamma-aminobutyric acid type A receptor alpha2 subunit [Source:HGNC Symbol;Acc:HGNC:4076]
1977	0.539421462	8.75E-120	aPSM-4	PODXL	podocalyxin like [Source:HGNC Symbol;Acc:HGNC:9171]
1978	0.278930806	2.29E-117	aPSM-4	THBS1	thrombospondin 1 [Source:HGNC Symbol;Acc:HGNC:11785]
1979	0.40043258	1.23E-116	aPSM-4	COL1A1	collagen type I alpha 1 chain [Source:HGNC Symbol;Acc:HGNC:2197]
1980	1.096795227	3.03E-115	aPSM-4	SLC2A3	solute carrier family 2 member 3 [Source:HGNC Symbol;Acc:HGNC:11007]
1981	0.695176357	4.47E-115	aPSM-4	SVIL	supervillin [Source:HGNC Symbol;Acc:HGNC:11480]
1982	0.611922745	1.59E-114	aPSM-4	PERP	p53 apoptosis effector related to PMP22 [Source:HGNC Symbol;Acc:HGNC:17637]
1983	0.567561319	4.44E-114	aPSM-4	CD99	CD99 molecule (Xg blood group) [Source:HGNC Symbol;Acc:HGNC:7082]
1984	0.339007699	8.61E-114	aPSM-4	MT1F	metallothionein 1F [Source:HGNC Symbol;Acc:HGNC:7398]
1985	0.378448746	5.48E-111	aPSM-4	ACTG1	actin gamma 1 [Source:HGNC Symbol;Acc:HGNC:144]
1986	0.758698262	1.97E-110	aPSM-4	MSX1	msh homeobox 1 [Source:HGNC Symbol;Acc:HGNC:7391]
1987	0.385077484	4.21E-110	aPSM-4	ATF3	activating transcription factor 3 [Source:HGNC Symbol;Acc:HGNC:785]
1988	0.532348038	8.90E-110	aPSM-4	SDC2	syndecan 2 [Source:HGNC Symbol;Acc:HGNC:10659]
1989	0.546656674	7.83E-109	aPSM-4	PPP2R5C	protein phosphatase 2 regulatory subunit B'gamma [Source:HGNC Symbol;Acc:HGNC:9311]
1990	0.616481864	1.80E-108	aPSM-4	PPFIBP1	PPFIA binding protein 1 [Source:HGNC Symbol;Acc:HGNC:9249]
1991	0.651907645	1.21E-106	aPSM-4	ENC1	ectodermal-neural cortex 1 [Source:HGNC Symbol;Acc:HGNC:3345]
1992	0.744952313	2.91E-105	aPSM-4	VCL	vinculin [Source:HGNC Symbol;Acc:HGNC:12665]
1993	0.260439142	4.33E-105	aPSM-4	MSRB3	methionine sulfoxide reductase B3 [Source:HGNC Symbol;Acc:HGNC:27375]
1994	0.313609291	9.88E-105	aPSM-4	NOV	NA
1995	0.493208444	3.70E-104	aPSM-4	ADA	adenosine deaminase [Source:HGNC Symbol;Acc:HGNC:186]
1996	0.578486344	2.14E-103	aPSM-4	ACTN1	actinin alpha 1 [Source:HGNC Symbol;Acc:HGNC:163]
1997	0.8554606	3.09E-103	aPSM-4	RP3-512B11.3	NA
1998	0.439084923	1.18E-102	aPSM-4	NOTUM	notum, palmitoleoyl-protein carboxylesterase [Source:HGNC Symbol;Acc:HGNC:27106]
1999	0.466599388	1.38E-102	aPSM-4	CCBE1	collagen and calcium binding EGF domains 1 [Source:HGNC Symbol;Acc:HGNC:29426]
[truncated: 1,507 more rows]
